# Supplementary material for: H2O2-mediated oxidative formation of amides from aromatic amines and 1,3-diketones as acylation agents via C–C bond cleavage at room temperature in water under metal-free conditions
Source: Royal Society of Chemistry journal article supplement (doi:10.1039/c3gc41260a), 2013-01-01
Supplement: c3gc41260a.pdf [file c3gc41260a.pdf]

## *Supporting Information*

# **H<sub>2</sub>O<sub>2</sub>-Mediated Oxidative Formation of Amides from Aromatic Amines and 1,3-Diketones as Novel Acylation Agents via C–C Bond Cleavage at Room Temperature in Water under Metal-Free Conditions**

Xi Sun,<sup>[a]</sup> Min Wang,<sup>[b]</sup> Pinhua Li,<sup>[b]</sup> Xiuli Zhang,<sup>\*[a][c]</sup> and Lei Wang<sup>\*[b][c]</sup>

<sup>[a]</sup> Department of Chemistry, Anhui Agricultural University, Hefei, Anhui 230036, P R China

<sup>[b]</sup> Department of Chemistry, Huaibei Normal University, Huaibei, Anhui 235000, P R China; Tel: + 86-561-3802-069 Fax: + 86-561-3090-518 E-mail: leiwang@chnu.edu.cn

<sup>[c]</sup> State Key Laboratory of Organometallic Chemistry, Shanghai Institute of Organic Chemistry, Chinese Academy of Sciences, Shanghai 200032, P R China

### *Table of Contents for Supporting Information*

|                                                                                                         |    |
|---------------------------------------------------------------------------------------------------------|----|
| 1. General considerations.....                                                                          | 2  |
| 2. General procedures .....                                                                             | 2  |
| 3. Optimization of the solvent, and the concentration and amount of H <sub>2</sub> O <sub>2</sub> ..... | 3  |
| 4. Characterization data for all products.....                                                          | 4  |
| 5. <sup>1</sup> H, and <sup>13</sup> C NMR spectra of all products.....                                 | 15 |
| 6. References.....                                                                                      | 49 |

## 1. General considerations

All reagents were purchased from commercial suppliers and used without further purification. All the reactions were carried out under an air atmosphere.  $^1\text{H}$  NMR,  $^{13}\text{C}$  NMR spectra were measured on a Bruker Avance NMR spectrometer (400 MHz or 100MHz, respectively) with  $\text{CDCl}_3$  as solvent and recorded in ppm relative to internal tetramethylsilane standard. The peak patterns are indicated as follows: s, singlet; d, doublet; t, triplet; m, multiplet; q, quartet. The coupling constants, J, are reported in Hertz (Hz).

## 2. General procedure

A 10 mL of reaction tube was charged with aniline (0.50 mmol), 1,3-diketone (0.60 mmol) and  $\text{H}_2\text{O}_2$  (30%, aq., 1.5 mmol) in the air. After the reaction was carried out at room temperature (about 25 °C) for 8 h, it was extracted twice with EtOAc. The organic layers were combined, dried over  $\text{Na}_2\text{SO}_4$ , and concentrated to yield the crude product, which was further purified by flash chromatography on silica gel to give the desired product.

### 3. Optimization of the solvent, and the concentration and amount of H<sub>2</sub>O<sub>2</sub> in the reaction (Table S1)

**Table S1** Optimization of the solvent, and the concentration and amount of H<sub>2</sub>O<sub>2</sub> in the model reaction<sup>a</sup>

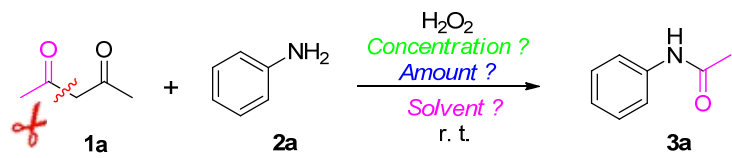

| Entry | H <sub>2</sub> O <sub>2</sub> (concentration, amount) | Solvent            | Yield (%) <sup>b</sup> |
|-------|-------------------------------------------------------|--------------------|------------------------|
| 1     | H <sub>2</sub> O <sub>2</sub> (30% aq., 3.0 eq.)      | Toluene            | 41                     |
| 2     | H <sub>2</sub> O <sub>2</sub> (30% aq., 3.0 eq.)      | DMF                | 0                      |
| 3     | H <sub>2</sub> O <sub>2</sub> (30% aq., 3.0 eq.)      | DMSO               | 0                      |
| 4     | H <sub>2</sub> O <sub>2</sub> (30% aq., 3.0 eq.)      | DME                | 0                      |
| 5     | H <sub>2</sub> O <sub>2</sub> (30% aq., 3.0 eq.)      | CH <sub>3</sub> CN | 0                      |
| 6     | H <sub>2</sub> O <sub>2</sub> (30% aq., 3.0 eq.)      | Dioxane            | 0                      |
| 7     | H <sub>2</sub> O <sub>2</sub> (30% aq., 3.0 eq.)      | THF                | 0                      |
| 8     | H <sub>2</sub> O <sub>2</sub> (30% aq., 5.0 eq.)      | Neat               | 88                     |
| 9     | H <sub>2</sub> O <sub>2</sub> (30% aq., 4.0 eq.)      | Neat               | 88                     |
| 10    | H <sub>2</sub> O <sub>2</sub> (30% aq., 3.0 eq.)      | Neat               | 88                     |
| 11    | H <sub>2</sub> O <sub>2</sub> (30% aq., 2.0 eq.)      | Neat               | 69                     |
| 12    | H <sub>2</sub> O <sub>2</sub> (30% aq., 1.0 eq.)      | Neat               | 37                     |
| 13    | H <sub>2</sub> O <sub>2</sub> (35% aq., 3.0 eq.)      | Neat               | 88                     |
| 14    | H <sub>2</sub> O <sub>2</sub> (25% aq., 3.0 eq.)      | Neat               | 82                     |
| 15    | H <sub>2</sub> O <sub>2</sub> (20% aq., 3.0 eq.)      | Neat               | 67                     |
| 16    | H <sub>2</sub> O <sub>2</sub> (15% aq., 3.0 eq.)      | Neat               | 56                     |
| 17    | H <sub>2</sub> O <sub>2</sub> (6.0% aq., 3.0 eq.)     | Neat               | 41                     |

<sup>a</sup> Reaction conditions: **1a** (0.50 mmol), **2a** (0.60 mmol), H<sub>2</sub>O<sub>2</sub> (aq. concentration, amount used in the reaction indicated in Table), solvent (2.0 mL) if needed, room temperature for 8 h. <sup>b</sup> Isolated yields.

#### 4. Characterization data for all products

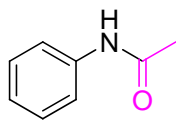

##### **N-Phenylacetamide.**<sup>[1]</sup>

**3a:** Colorless solid. <sup>1</sup>H NMR (400 MHz, CDCl<sub>3</sub>) δ: 7.78 (br, 1H), 7.52–7.50 (m, 2H), 7.32–7.28 (m, 2H), 7.12–7.08 (m, 1H), 2.16 (s, 3H); <sup>13</sup>C NMR (100 MHz, CDCl<sub>3</sub>) δ: 168.6, 137.9, 128.9, 124.2, 120.0, 24.5.

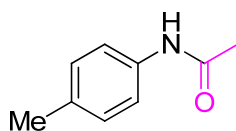

##### **N-(p-Tolyl)acetamide.**<sup>[2]</sup>

**3b:** Colorless solid. <sup>1</sup>H NMR (400 MHz, CDCl<sub>3</sub>) δ: 7.66 (br, 1H), 7.38 (d, *J* = 8.4 Hz, 2H), 7.10 (d, *J* = 8.4 Hz, 2H), 2.31 (s, 3H), 2.14 (s, 3H); <sup>13</sup>C NMR (100 MHz, CDCl<sub>3</sub>) δ: 168.5, 135.4, 133.9, 129.4, 120.1, 24.3, 20.8.

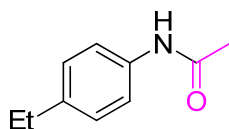

##### **N-(4-Ethylphenyl)acetamide.**<sup>[3]</sup>

**3c:** Colorless solid. <sup>1</sup>H NMR (400 MHz, CDCl<sub>3</sub>) δ: 8.00 (br, 1H), 7.41 (d, *J* = 8.0 Hz, 2H), 7.12 (d, *J* = 8.0 Hz, 2H), 2.61 (q, *J* = 7.6 Hz, 2H), 2.13 (s, 3H), 1.21 (t, *J* = 7.6 Hz, 3H); <sup>13</sup>C NMR (100 MHz, CDCl<sub>3</sub>) δ: 168.8, 140.2, 135.6, 128.1, 120.3, 28.2, 24.2, 15.5.

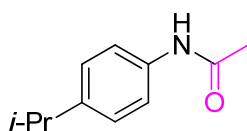

***N*-(4-*iso*-Propylphenyl)acetamide.**<sup>[3]</sup>

**3d:** Colorless solid. <sup>1</sup>H NMR (400 MHz, CDCl<sub>3</sub>) δ: 7.86 (br, 1H), 7.42 (d, *J* = 8.4 Hz, 2H), 7.16 (d, *J* = 8.4 Hz, 2H), 2.90–2.84 (m, 1H), 2.14 (s, 3H), 1.23 (d, *J* = 6.8 Hz, 6H); <sup>13</sup>C NMR (100 MHz, CDCl<sub>3</sub>) δ: 168.7, 144.9, 135.6, 126.7, 120.3, 33.5, 24.3, 23.9.

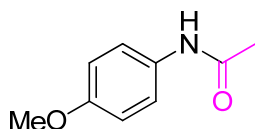

***N*-(4-Methoxyphenyl)acetamide.**<sup>[2]</sup>

**3e:** Colorless solid. <sup>1</sup>H NMR (400 MHz, CDCl<sub>3</sub>) δ: 8.21 (br, 1H), 7.38 (d, *J* = 8.8 Hz, 2H), 6.80 (d, *J* = 8.8 Hz, 2H), 3.75 (s, 3H), 2.09 (s, 3H); <sup>13</sup>C NMR (100 MHz, CDCl<sub>3</sub>) δ: 168.8, 156.3, 131.1, 122.0, 113.9, 55.3, 23.9.

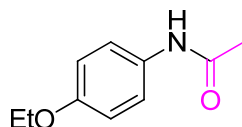

***N*-(4-Ethoxyphenyl)acetamide.**<sup>[4]</sup>

**3f:** Colorless solid. <sup>1</sup>H NMR (400 MHz, CDCl<sub>3</sub>) δ: 8.13 (br, 1H), 7.36 (d, *J* = 8.8 Hz, 2H), 6.79 (d, *J* = 8.8 Hz, 2H), 3.97 (q, *J* = 7.2 Hz, 2H), 2.09 (s, 3H), 1.38 (t, *J* = 6.8 Hz, 3H); <sup>13</sup>C NMR (100 MHz, CDCl<sub>3</sub>) δ: 168.8, 155.6, 131.0, 122.0, 114.6, 63.6, 24.0, 14.7.

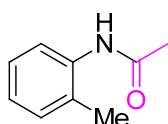

***N*-(*o*-Tolyl)acetamide.**<sup>[2]</sup>

**3g:** Colorless solid.  $^1\text{H}$  NMR (400 MHz,  $\text{CDCl}_3$ )  $\delta$ : 7.64–7.62 (m, 1H), 7.38 (br, 1H), 7.17–7.15 (m, 2H), 7.09–7.05 (m, 1H), 2.22 (s, 3H), 2.15 (s, 3H);  $^{13}\text{C}$  NMR (100 MHz,  $\text{CDCl}_3$ )  $\delta$ : 168.7, 135.6, 130.4, 130.0, 126.5, 125.4, 123.9, 23.9, 17.7.

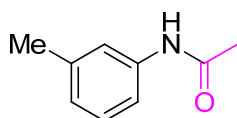

***N*-(*m*-Tolyl)acetamide.**<sup>[2]</sup>

**3h:** Colorless solid.  $^1\text{H}$  NMR (400 MHz,  $\text{CDCl}_3$ )  $\delta$ : 7.96 (br, 1H), 7.36 (s, 1H), 7.31–7.29 (m, 1H), 7.19–7.16 (m, 1H), 6.92–6.91 (m, 1H), 2.30 (s, 3H), 2.15 (s, 3H);  $^{13}\text{C}$  NMR (100 MHz,  $\text{CDCl}_3$ )  $\delta$ : 168.8, 138.7, 137.8, 128.6, 125.0, 120.7, 117.1, 24.4, 21.4.

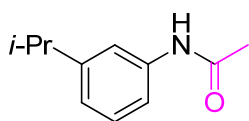

***N*-(3-*iso*-Propylphenyl)acetamide.**<sup>[5]</sup>

**3i:** Colorless solid.  $^1\text{H}$  NMR (400 MHz,  $\text{CDCl}_3$ )  $\delta$ : 7.48 (br, 1H), 7.36–7.35 (m, 2H), 7.26–7.22 (m, 1H), 6.99–6.97 (m, 1H), 2.91–2.84 (m, 1H), 2.17 (s, 3H), 1.24 (d,  $J = 6.8$  Hz, 6H);  $^{13}\text{C}$  NMR (100 MHz,  $\text{CDCl}_3$ )  $\delta$ : 168.6, 149.8, 137.9, 128.8, 122.4, 118.1, 117.5, 34.0, 24.4, 23.8.

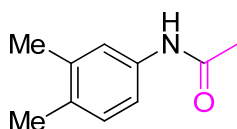

***N*-(3,4-Dimethylphenyl)acetamide.**<sup>[3]</sup>

**3j:** Colorless solid.  $^1\text{H}$  NMR (400 MHz,  $\text{CDCl}_3$ )  $\delta$ : 8.15 (br, 1H), 7.29–7.23 (m, 2H), 7.04–7.02 (m, 1H), 2.20 (s, 3H), 2.19 (s, 3H), 2.13 (s, 3H);  $^{13}\text{C}$

NMR (100 MHz, CDCl<sub>3</sub>)  $\delta$ : 168.8, 136.9, 135.7, 132.4, 129.7, 121.6, 117.7, 24.1, 19.7, 19.0.

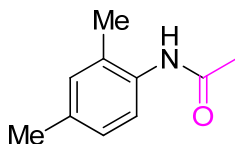

***N*-(2,4-Dimethylphenyl)acetamide.**<sup>[6]</sup>

**3k:** Colorless solid. <sup>1</sup>H NMR (400 MHz, CDCl<sub>3</sub>)  $\delta$ : 7.45–7.43 (m, 1H), 7.30 (br, 1H), 6.98–6.96 (m, 2H), 2.28 (s, 3H), 2.18 (s, 3H), 2.14 (s, 3H); <sup>13</sup>C NMR (100 MHz, CDCl<sub>3</sub>)  $\delta$ : 168.7, 135.2, 132.9, 131.0, 130.4, 127.0, 124.2, 23.8, 20.8, 17.6.

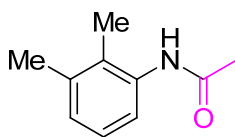

***N*-(2,3-Dimethylphenyl)acetamide.**<sup>[7]</sup>

**3l:** Colorless solid. <sup>1</sup>H NMR (400 MHz, CDCl<sub>3</sub>)  $\delta$ : 7.34–7.32 (m, 1H), 7.14 (br, 1H), 7.09–7.05 (m, 1H), 7.02–6.99 (m, 1H), 2.28 (s, 3H), 2.16 (s, 3H), 2.11 (s, 3H); <sup>13</sup>C NMR (100 MHz, CDCl<sub>3</sub>)  $\delta$ : 168.8, 137.4, 135.2, 130.1, 127.6, 125.7, 122.7, 23.8, 20.5, 13.8.

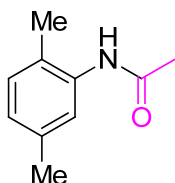

***N*-(2,5-Dimethylphenyl)acetamide.**<sup>[7]</sup>

**3m:** Colorless solid. <sup>1</sup>H NMR (400 MHz, CDCl<sub>3</sub>)  $\delta$ : 7.46 (s, 1H), 7.34 (br, 1H), 7.05–7.03 (m, 1H), 6.89–6.88 (m, 1H), 2.29 (s, 3H), 2.18 (s, 3H), 2.14

(s, 3H);  $^{13}\text{C}$  NMR (100 MHz,  $\text{CDCl}_3$ )  $\delta$ : 168.6, 136.2, 135.3, 130.1, 126.2, 124.5, 23.9, 20.9, 17.2.

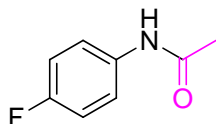

**N-(4-Fluorophenyl)acetamide.**<sup>[8]</sup>

**3n:** Colorless solid.  $^1\text{H}$  NMR (400 MHz,  $\text{CDCl}_3$ )  $\delta$ : 7.77 (br, 1H), 7.46–7.43 (m, 2H), 7.00–6.96 (m, 2H), 2.14 (s, 3H);  $^{13}\text{C}$  NMR (100 MHz,  $\text{CDCl}_3$ )  $\delta$ : 168.7, 159.4 (d,  $J_{\text{CF}} = 242.1$  Hz), 133.8 (d,  $J_{\text{CF}} = 2.8$  Hz), 121.9 (d,  $J_{\text{CF}} = 7.9$  Hz), 115.5 (d,  $J_{\text{CF}} = 22.4$  Hz), 24.2.

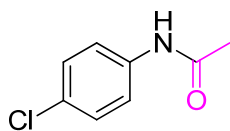

**N-(4-Chlorophenyl)acetamide.**<sup>[2]</sup>

**3o:** Colorless solid.  $^1\text{H}$  NMR (400 MHz,  $\text{CDCl}_3$ )  $\delta$ : 7.47–7.45 (m, 2H), 7.33 (br, 1H), 7.31–7.27 (m, 2H), 2.18 (s, 3H);  $^{13}\text{C}$  NMR (100 MHz,  $\text{CDCl}_3$ )  $\delta$ : 168.3, 136.4, 129.3, 129.0, 121.1, 24.5.

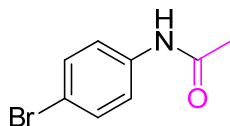

**N-(4-Bromophenyl)acetamide.**<sup>[8]</sup>

**3p:** Colorless solid.  $^1\text{H}$  NMR (400 MHz,  $\text{CDCl}_3$ )  $\delta$ : 7.59 (br, 1H), 7.47–7.41 (m, 4H), 2.16 (s, 3H);  $^{13}\text{C}$  NMR (100 MHz,  $\text{CDCl}_3$ )  $\delta$ : 168.4, 136.9, 131.9, 121.4, 116.9, 24.5.



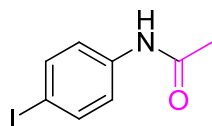

***N*-(4-Iodophenyl)acetamide.**<sup>[9]</sup>

**3q:** Colorless solid. <sup>1</sup>H NMR (400 MHz, CDCl<sub>3</sub>) δ: 7.61 (d, *J* = 8.8 Hz, 2H), 7.36 (br, 1H), 7.29 (d, *J* = 8.4 Hz, 2H), 2.17 (s, 3H); <sup>13</sup>C NMR (100 MHz, CDCl<sub>3</sub>) δ: 168.3, 137.9, 137.6, 121.6, 87.4, 24.6.

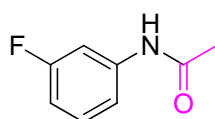

***N*-(3-Fluorophenyl)acetamide.**<sup>[8]</sup>

**3r:** Colorless solid. <sup>1</sup>H NMR (400 MHz, CDCl<sub>3</sub>) δ: 8.32 (br, 1H), 7.48–7.46 (m, 1H), 7.23–7.19 (m, 1H), 7.17–7.15 (m, 1H), 6.80–6.77 (m, 1H), 2.16 (s, 3H); <sup>13</sup>C NMR (100 MHz, CDCl<sub>3</sub>) δ: 169.3, 162.9 (d, *J*<sub>CF</sub> = 243.1 Hz), 139.5 (d, *J*<sub>CF</sub> = 10.8 Hz), 130.0 (d, *J*<sub>CF</sub> = 9.3 Hz), 115.3 (d, *J*<sub>CF</sub> = 2.8 Hz), 111.0 (d, *J*<sub>CF</sub> = 21.2 Hz), 107.5 (d, *J*<sub>CF</sub> = 25.9 Hz), 24.4.

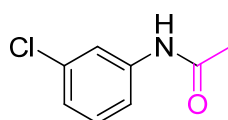

***N*-(3-Chlorophenyl)acetamide.**<sup>[8]</sup>

**3s:** Colorless solid. <sup>1</sup>H NMR (400 MHz, CDCl<sub>3</sub>) δ: 8.28 (br, 1H), 7.64 (s, 1H), 7.35–7.33 (m, 1H), 7.22–7.17 (m, 1H), 7.09–7.05 (m, 1H), 2.16 (s, 3H); <sup>13</sup>C NMR (100 MHz, CDCl<sub>3</sub>) δ: 169.2, 139.0, 134.4, 129.8, 124.3, 120.2, 118.0, 24.3.

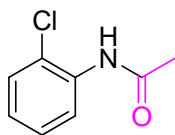

***N*-(2-Chlorophenyl)acetamide.**<sup>[8]</sup>

**3t:** Colorless solid. <sup>1</sup>H NMR (400 MHz, CDCl<sub>3</sub>) δ: 8.32–8.30 (m, 1H), 7.68 (br, 1H), 7.36–7.34 (m, 1H), 7.27–7.23 (m, 1H), 7.05–7.01 (m, 1H), 2.23 (s, 3H); <sup>13</sup>C NMR (100 MHz, CDCl<sub>3</sub>) δ: 168.3, 134.5, 128.9, 127.6, 124.6, 121.8, 121.1, 24.7.

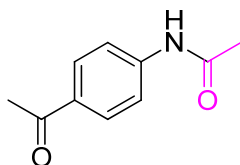

***N*-(4-Acetylphenyl)acetamide.**<sup>[3]</sup>

**3u:** Colorless solid. <sup>1</sup>H NMR (400 MHz, CDCl<sub>3</sub>) δ: 8.17 (br, 1H), 7.91 (d, *J* = 8.4 Hz, 2H), 7.64 (d, *J* = 8.4 Hz, 2H), 2.57 (s, 3H), 2.21 (s, 3H); <sup>13</sup>C NMR (100 MHz, CDCl<sub>3</sub>) δ: 197.3, 168.9, 142.5, 132.7, 129.7, 118.9, 26.4, 24.6.

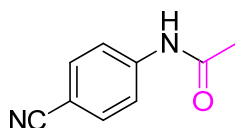

***N*-(4-Cyanophenyl)acetamide.**<sup>[8]</sup>

**3v:** Colorless solid. <sup>1</sup>H NMR (400 MHz, CD<sub>3</sub>COCD<sub>3</sub>) δ: 9.57 (br, 1H), 7.84 (d, *J* = 8.8 Hz, 2H), 7.69 (d, *J* = 8.8 Hz, 2H), 2.14 (s, 3H); <sup>13</sup>C NMR (100 MHz, CD<sub>3</sub>COCD<sub>3</sub>) δ: 168.8, 143.6, 132.9, 119.1, 118.6, 105.9, 23.5.

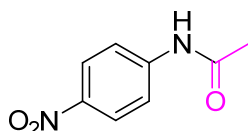

***N*-(4-Nitrophenyl)acetamide.**<sup>[10]</sup>

**3w:** Colorless solid. <sup>1</sup>H NMR (400 MHz, CD<sub>3</sub>COCD<sub>3</sub>) δ: 8.22 (br, 1H), 8.17 (d, *J* = 8.8 Hz, 2H), 7.88 (d, *J* = 8.8 Hz, 2H), 2.16 (s, 3H); <sup>13</sup>C NMR (100 MHz, CD<sub>3</sub>COCD<sub>3</sub>) δ: 169.4, 145.4, 142.7, 124.7, 118.6, 23.5.

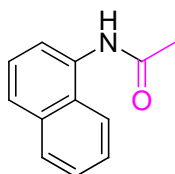

***N*-(Naphthalen-1-yl)acetamide.**<sup>[11]</sup>

**3x:** Colorless solid. <sup>1</sup>H NMR (400 MHz, CD<sub>3</sub>COCD<sub>3</sub>) δ: 9.22 (br, 1H), 8.15–8.13 (m, 1H), 7.91 (br, 2H), 7.72 (d, *J* = 8.0 Hz, 1H), 7.52–7.45 (m, 3H), 2.25 (s, 3H); <sup>13</sup>C NMR (100 MHz, CD<sub>3</sub>COCD<sub>3</sub>) δ: 168.5, 134.2, 133.9, 128.1, 127.6, 125.6, 125.5, 125.3, 124.8, 121.9, 120.7, 22.9.

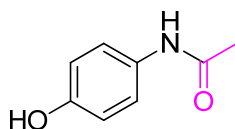

***N*-(4-Hydroxyphenyl)acetamide.**<sup>[10]</sup>

**3y:** Colorless solid. <sup>1</sup>H NMR (400 MHz, CD<sub>3</sub>COCD<sub>3</sub>) δ: 8.99 (br, 1H), 8.19 (s, 1H), 7.45 (d, *J* = 8.4 Hz, 2H), 6.76 (d, *J* = 8.4 Hz, 2H), 2.04 (s, 3H); <sup>13</sup>C NMR (100 MHz, CD<sub>3</sub>COCD<sub>3</sub>) δ: 167.4, 153.3, 131.7, 120.7, 114.9, 23.0.

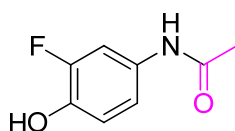

***N*-(3-Fluoro-4-hydroxyphenyl)acetamide.**<sup>[12]</sup>

**3z:** Colorless solid. <sup>1</sup>H NMR (400 MHz, CD<sub>3</sub>COCD<sub>3</sub>) δ: 9.18 (br, 1H), 8.49 (s, 1H), 7.64 (d, *J* = 13.2 Hz, 1H), 7.11 (d, *J* = 8.4 Hz, 1H), 6.93–6.88 (m,

1H), 2.06 (s, 3H);  $^{13}\text{C}$  NMR (100 MHz,  $\text{CD}_3\text{COCD}_3$ )  $\delta$ : 168.0, 150.7 (d,  $J_{\text{CF}} = 236.7$  Hz), 140.5 (d,  $J_{\text{CF}} = 13.1$  Hz), 132.0 (d,  $J_{\text{CF}} = 9.2$  Hz), 117.3 (d,  $J_{\text{CF}} = 3.5$  Hz), 115.2 (d,  $J_{\text{CF}} = 3.3$  Hz), 107.8 (d,  $J_{\text{CF}} = 23.1$  Hz), 23.0.

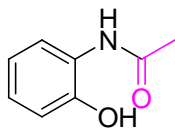

**N-(2-Hydroxyphenyl)acetamide.**<sup>[13]</sup>

**3aa:** Colorless solid.  $^1\text{H}$  NMR (400 MHz,  $\text{CD}_3\text{COCD}_3$ )  $\delta$ : 9.41 (s, 1H), 9.27 (br, 1H), 7.41 (d,  $J = 8.0$  Hz, 1H), 7.04–7.01 (m, 1H), 6.90 (d,  $J = 8.0$  Hz, 1H), 6.82–6.79 (m, 1H), 2.21 (s, 3H);  $^{13}\text{C}$  NMR (100 MHz,  $\text{CD}_3\text{COCD}_3$ )  $\delta$ : 170.2, 148.4, 126.7, 125.5, 121.8, 119.5, 117.9, 22.5.

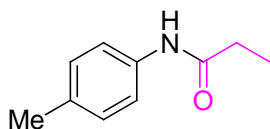

**N-(p-Tolyl)propionamide.**<sup>[14]</sup>

**3ab:** Colorless solid.  $^1\text{H}$  NMR (400 MHz,  $\text{CDCl}_3$ )  $\delta$ : 7.52 (br, 1H), 7.40 (d,  $J = 8.0$  Hz, 2H), 7.10 (d,  $J = 8.0$  Hz, 2H), 2.37 (q,  $J = 7.6$  Hz, 2H), 2.31 (s, 3H), 1.23 (t,  $J = 8.0$  Hz, 3H);  $^{13}\text{C}$  NMR (100 MHz,  $\text{CDCl}_3$ )  $\delta$ : 172.1, 135.4, 133.7, 129.4, 119.9, 30.6, 20.8, 9.7.

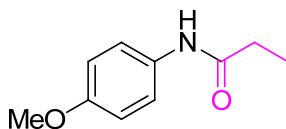

**N-(4-Methoxyphenyl)propionamide.**<sup>[14]</sup>

**3ac:** Colorless solid.  $^1\text{H}$  NMR (400 MHz,  $\text{CDCl}_3$ )  $\delta$ : 7.41 (d,  $J = 8.8$  Hz, 2H), 7.32 (br, 1H), 6.84 (d,  $J = 8.8$  Hz, 2H), 3.78 (s, 3H), 2.36 (q,  $J = 7.6$  Hz, 2H),

1.23 (t,  $J = 7.6$  Hz, 3H);  $^{13}\text{C}$  NMR (100 MHz,  $\text{CDCl}_3$ )  $\delta$ : 171.9, 156.3, 131.1, 121.8, 114.0, 55.4, 30.5, 9.7.

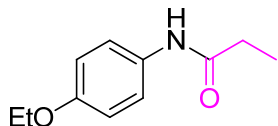

***N*-(4-Ethoxyphenyl)propionamide.**<sup>[15]</sup>

**3ad:** Colorless solid.  $^1\text{H}$  NMR (400 MHz,  $\text{CDCl}_3$ )  $\delta$ : 7.40 (d,  $J = 8.8$  Hz, 2H), 7.22 (br, 1H), 6.84 (d,  $J = 8.8$  Hz, 2H), 4.00 (q,  $J = 7.2$  Hz, 2H), 2.37 (q,  $J = 7.6$  Hz, 2H), 1.40 (t,  $J = 6.8$  Hz, 3H), 1.24 (t,  $J = 7.2$  Hz, 3H);  $^{13}\text{C}$  NMR (100 MHz,  $\text{CDCl}_3$ )  $\delta$ : 171.8, 155.7, 130.9, 121.7, 114.7, 63.7, 30.5, 14.8, 9.7.

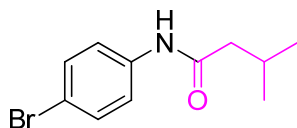

***N*-(4-Bromophenyl)-3-methylbutanamide.**<sup>[16]</sup>

**3ag:** Colorless solid.  $^1\text{H}$  NMR (400 MHz,  $\text{CDCl}_3$ )  $\delta$ : 7.48 (br, 1H), 7.44–7.39 (m, 4H), 2.21–2.16 (m, 3H), 1.00 (d,  $J = 6.0$  Hz, 6H);  $^{13}\text{C}$  NMR (100 MHz,  $\text{CDCl}_3$ )  $\delta$ : 171.0, 136.9, 131.9, 121.5, 116.7, 46.9, 26.2, 22.4.

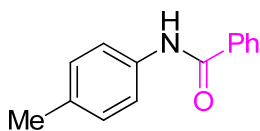

***N*-(*p*-Tolyl)benzamide.**<sup>[17]</sup>

**3ah:** Colorless solid.  $^1\text{H}$  NMR (400 MHz,  $\text{CDCl}_3$ )  $\delta$ : 8.17 (br, 1H), 7.85–7.84 (m, 2H), 7.55–7.51 (m, 2H), 7.49 (s, 1H), 7.43–7.40 (m, 2H), 7.15–7.13 (m, 2H), 2.34 (s, 3H);  $^{13}\text{C}$  NMR (100 MHz,  $\text{CDCl}_3$ )  $\delta$ : 165.8, 135.4, 134.9, 134.1, 131.5, 129.4, 128.5, 127.0, 120.5, 20.8.

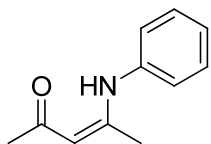

**4-(Phenylamino)pent-3-en-2-one.**<sup>[18]</sup>

**4a:** Yellow solid. <sup>1</sup>H NMR (400 MHz, CDCl<sub>3</sub>) δ: 12.48 (br, 1H), 7.35–7.32 (m, 2H), 7.20–7.17 (m, 1H), 7.11 (d, *J* = 7.6 Hz, 2H), 5.19 (s, 1H), 2.10 (s, 3H), 1.99 (s, 3H); <sup>13</sup>C NMR (100 MHz, CDCl<sub>3</sub>) δ: 196.1, 160.1, 138.7, 129.0, 125.5, 124.7, 97.6, 29.1, 19.7.

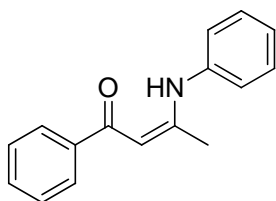

**3-Anilino-1-phenyl-2-buten-1-one.**<sup>[19]</sup>

**4k:** Yellow solid. <sup>1</sup>H NMR (400 MHz, CDCl<sub>3</sub>) δ: 13.13 (br, 1H), 7.94 (d, *J* = 7.2 Hz, 2H), 7.50–7.42 (m, 3H), 7.40–7.37 (m, 2H), 7.25–7.19 (m, 3H), 5.91 (s, 1H), 2.16 (s, 3H); <sup>13</sup>C NMR (100 MHz, CDCl<sub>3</sub>) δ: 188.6, 162.1, 139.9, 138.6, 130.8, 129.1, 128.2, 127.0, 125.7, 124.7, 94.2, 20.4.

## 5. $^1\text{H}$ and $^{13}\text{C}$ NMR spectra of all products

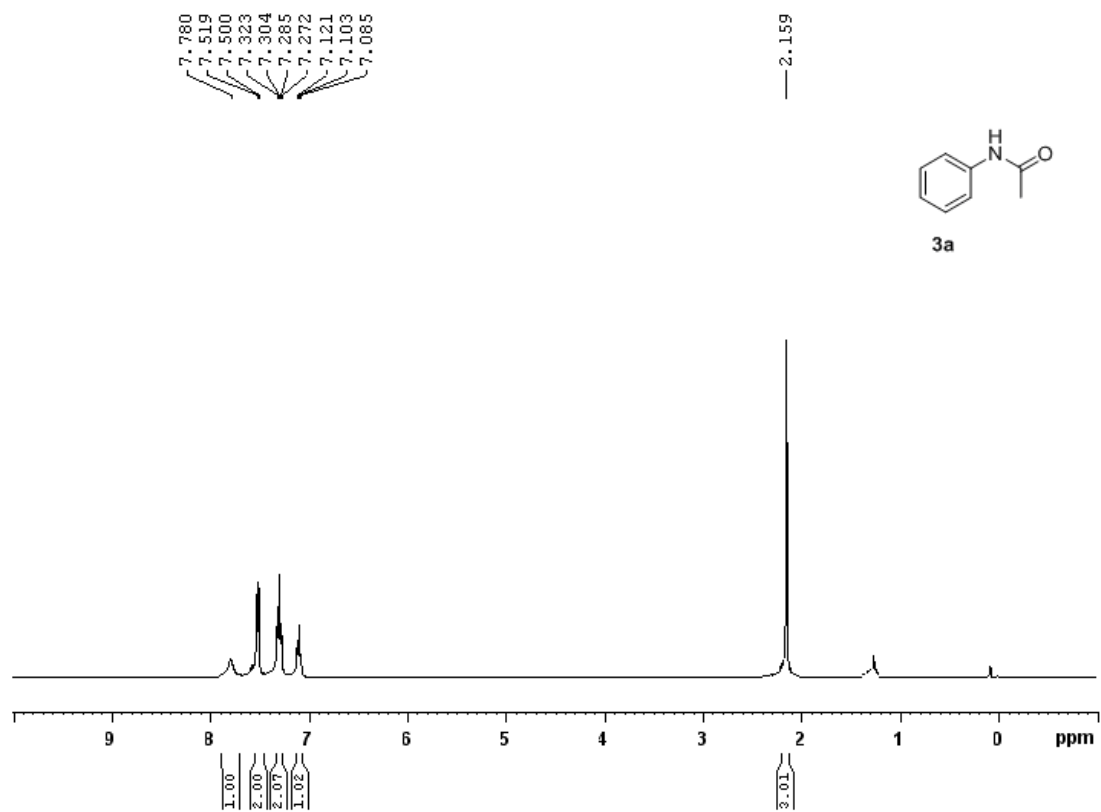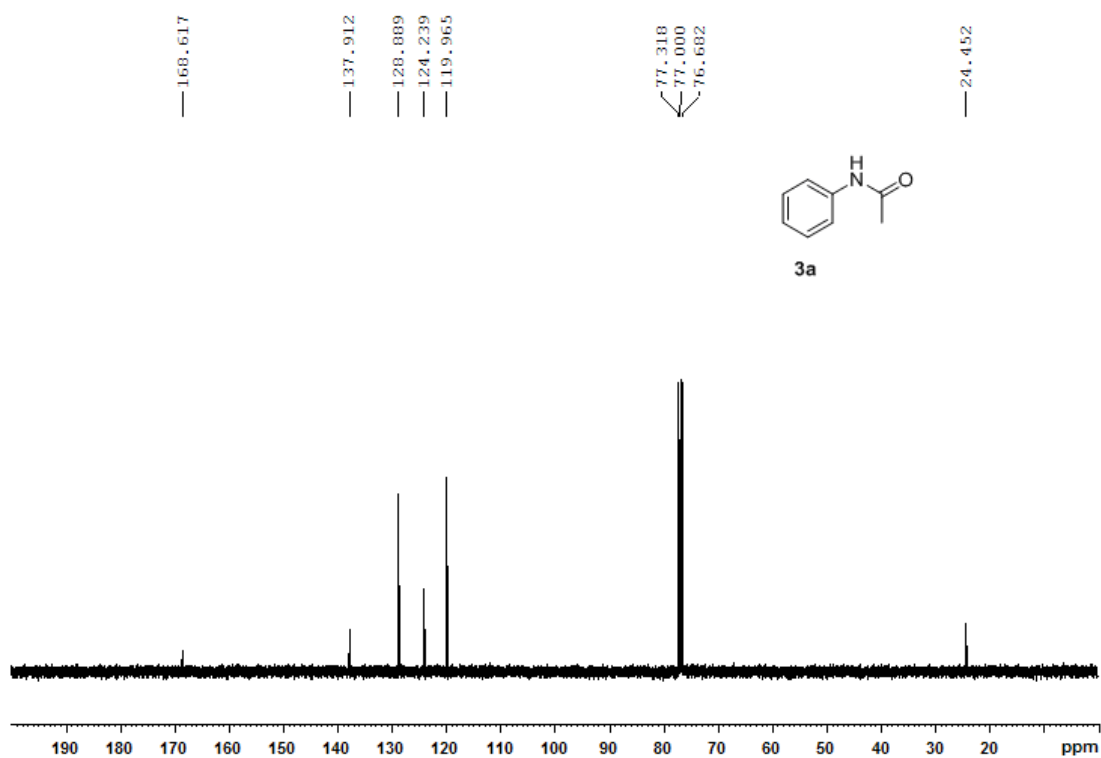

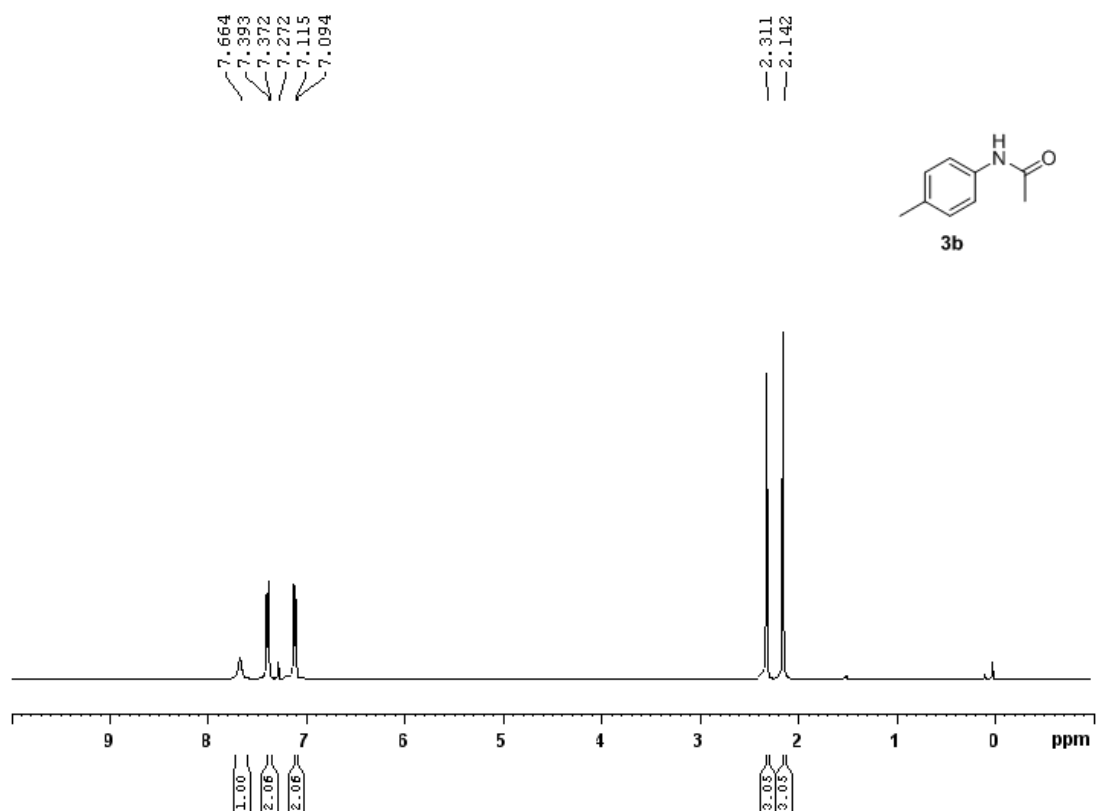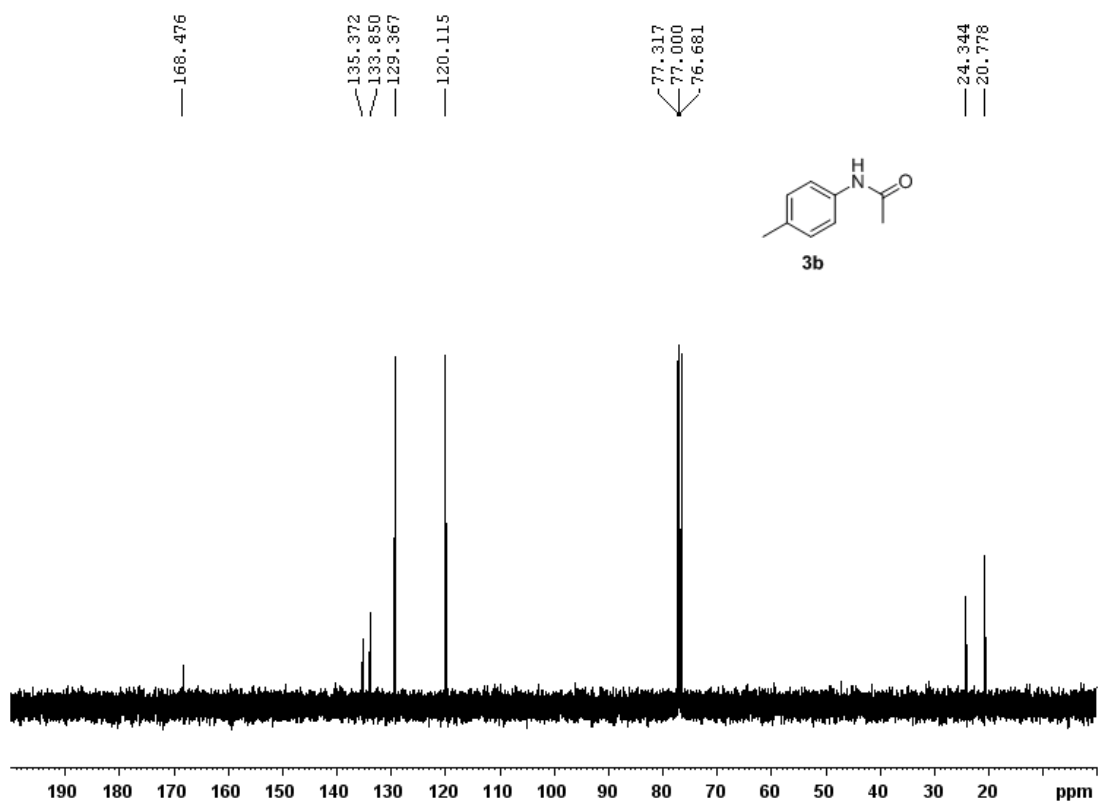



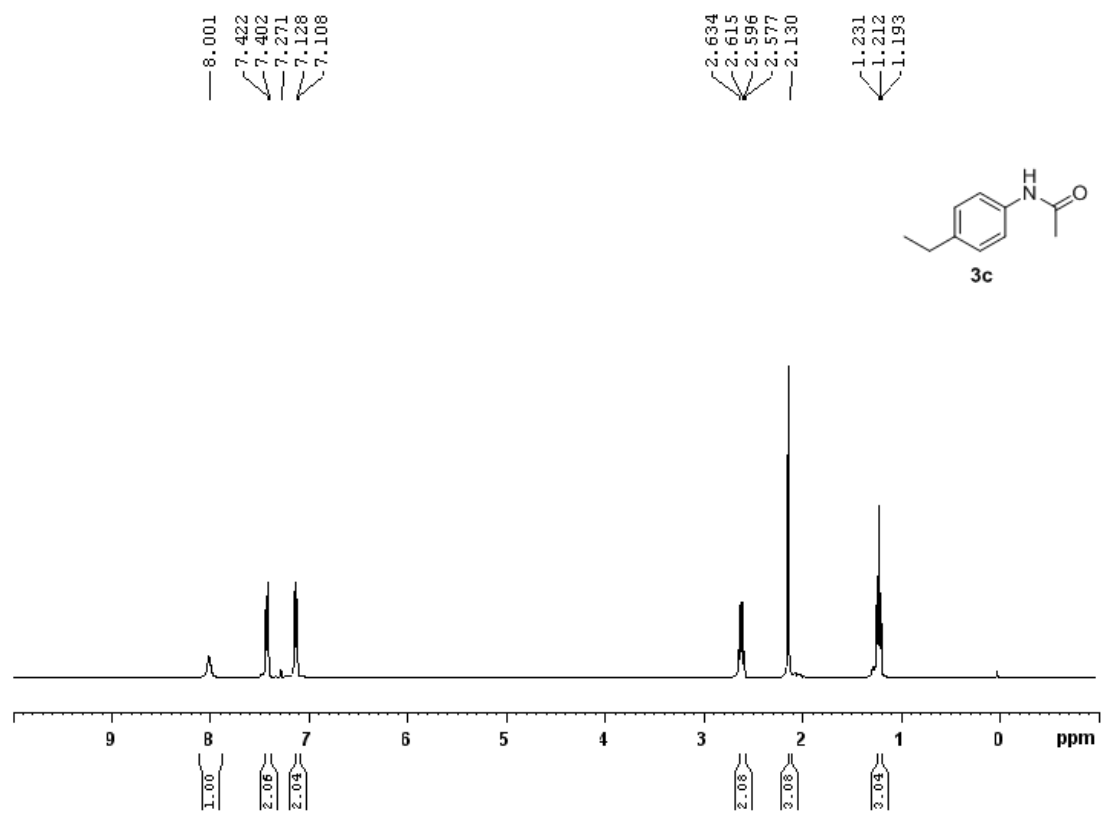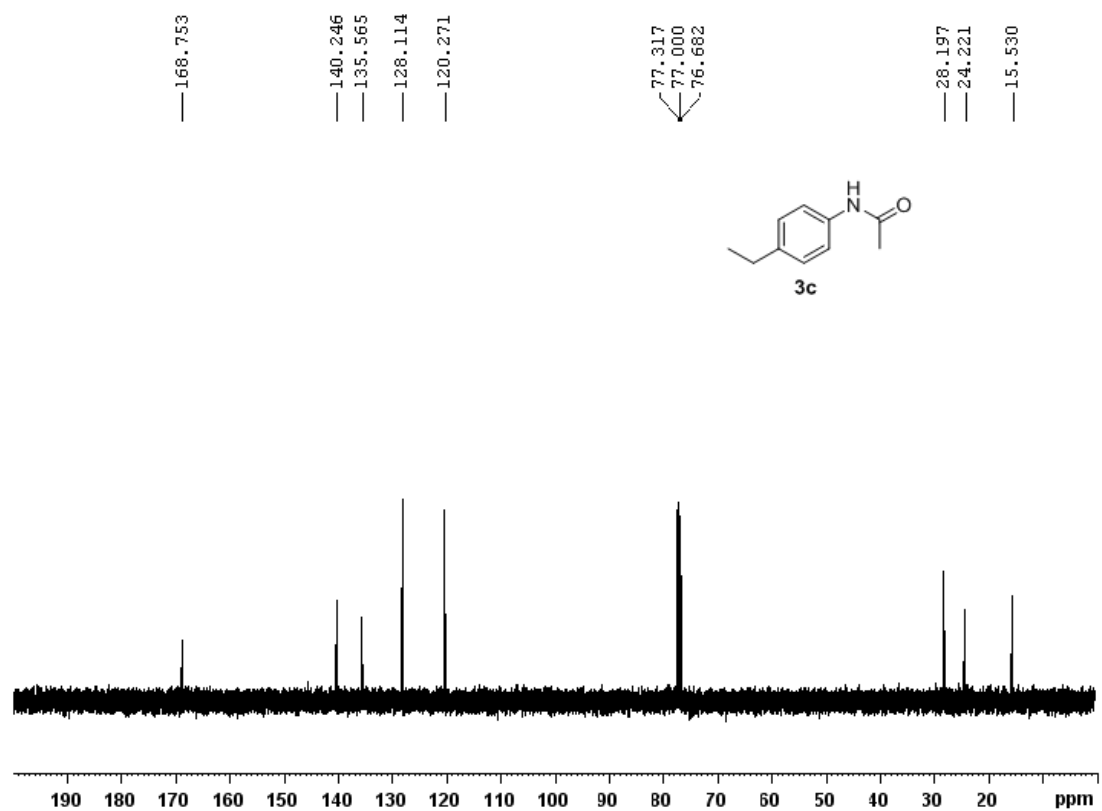

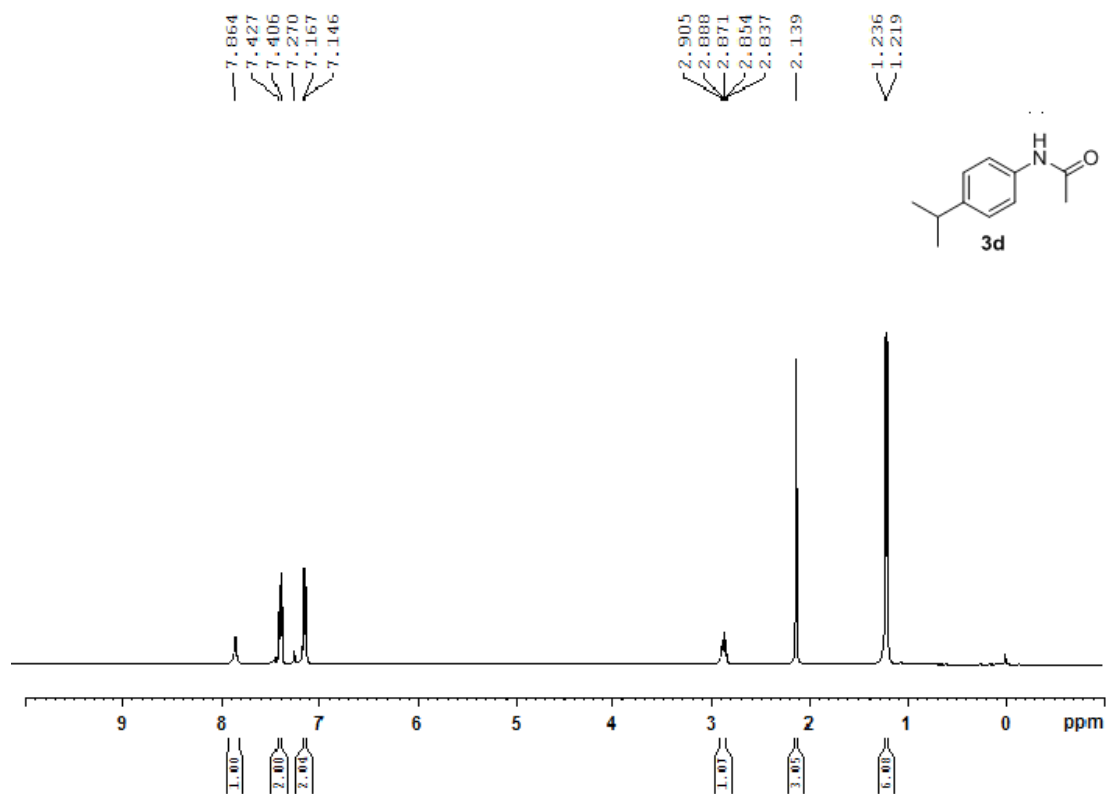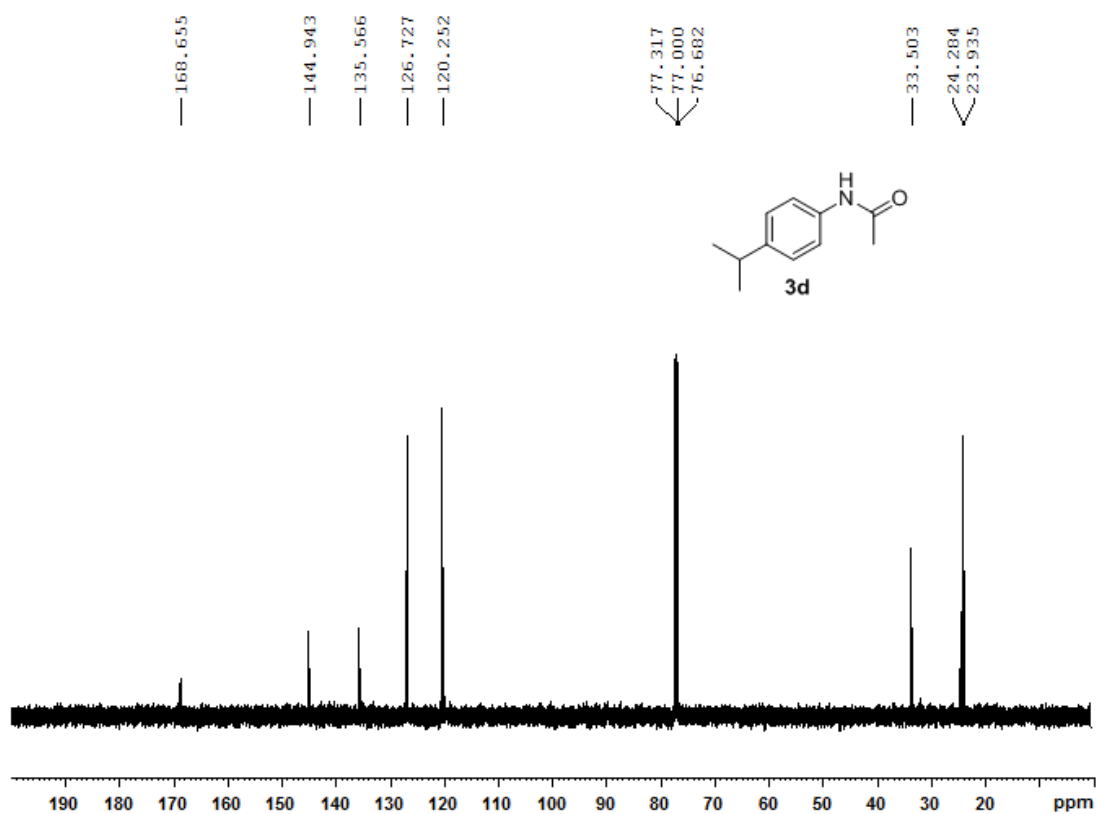

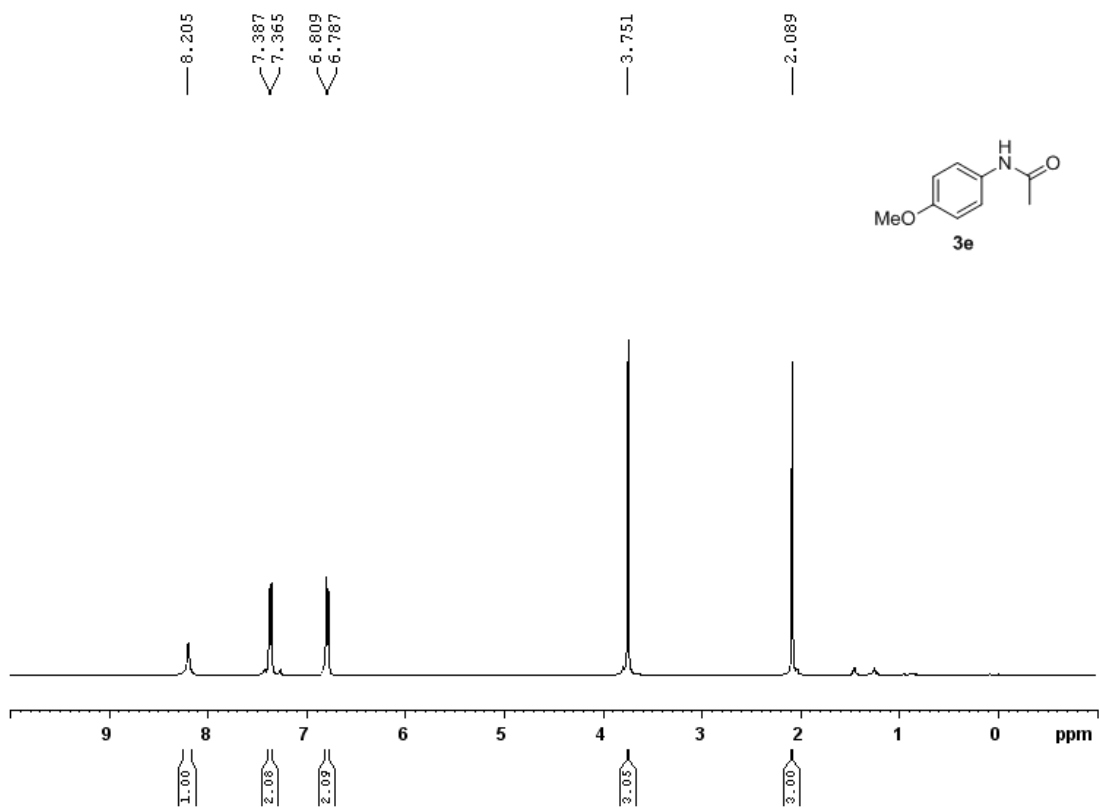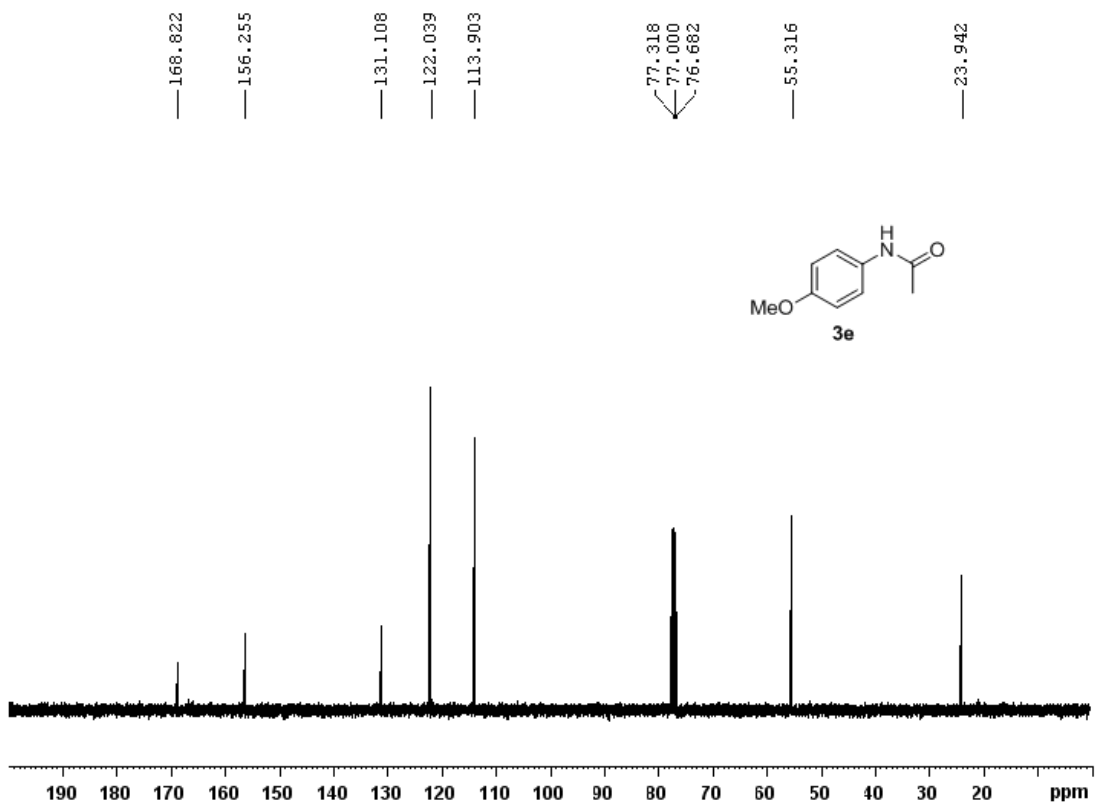

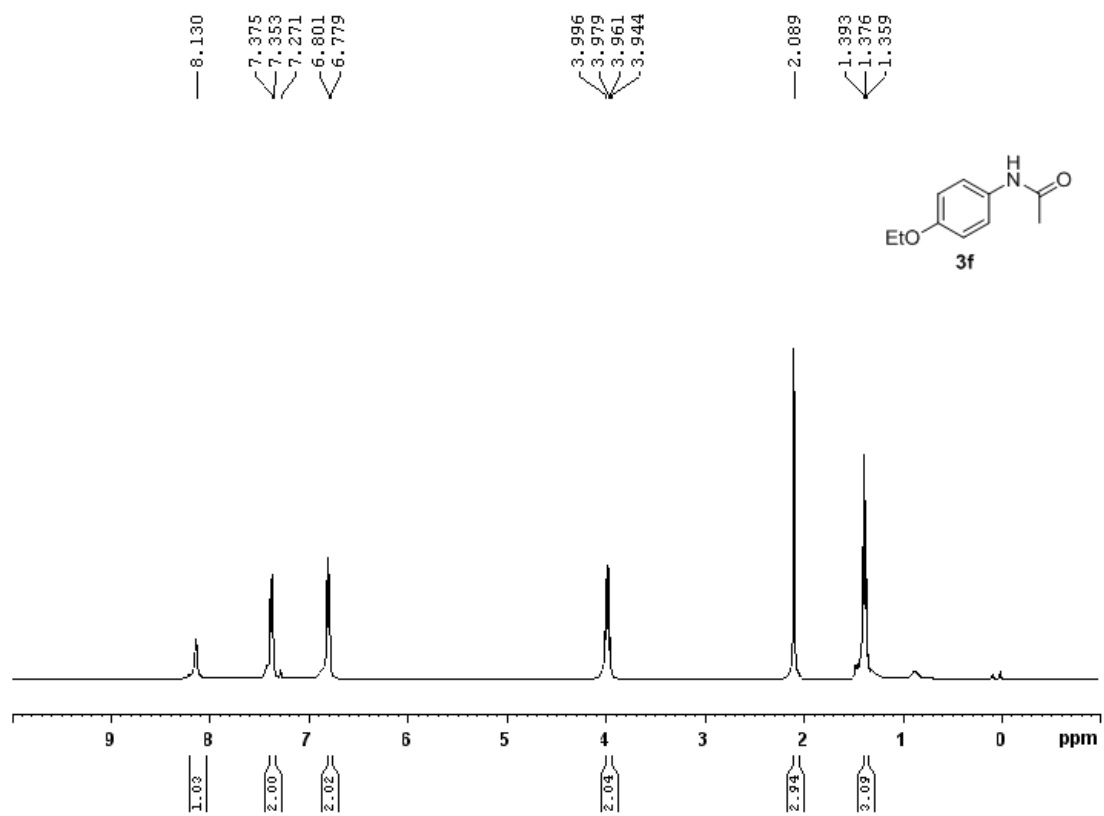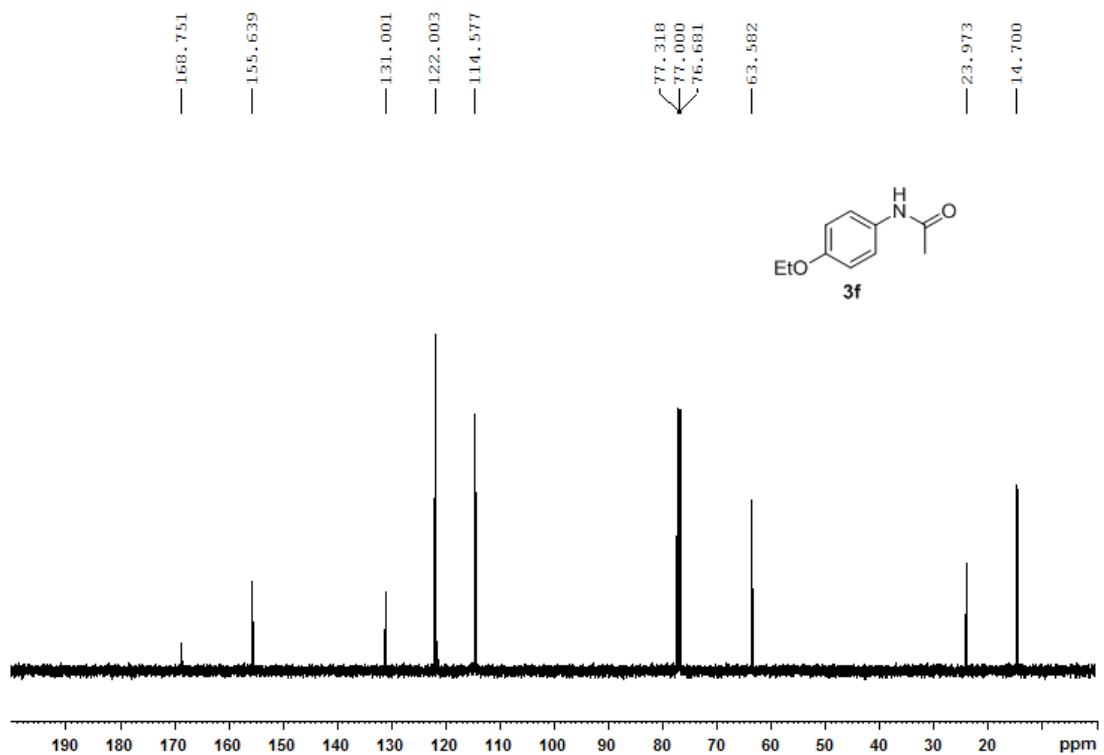

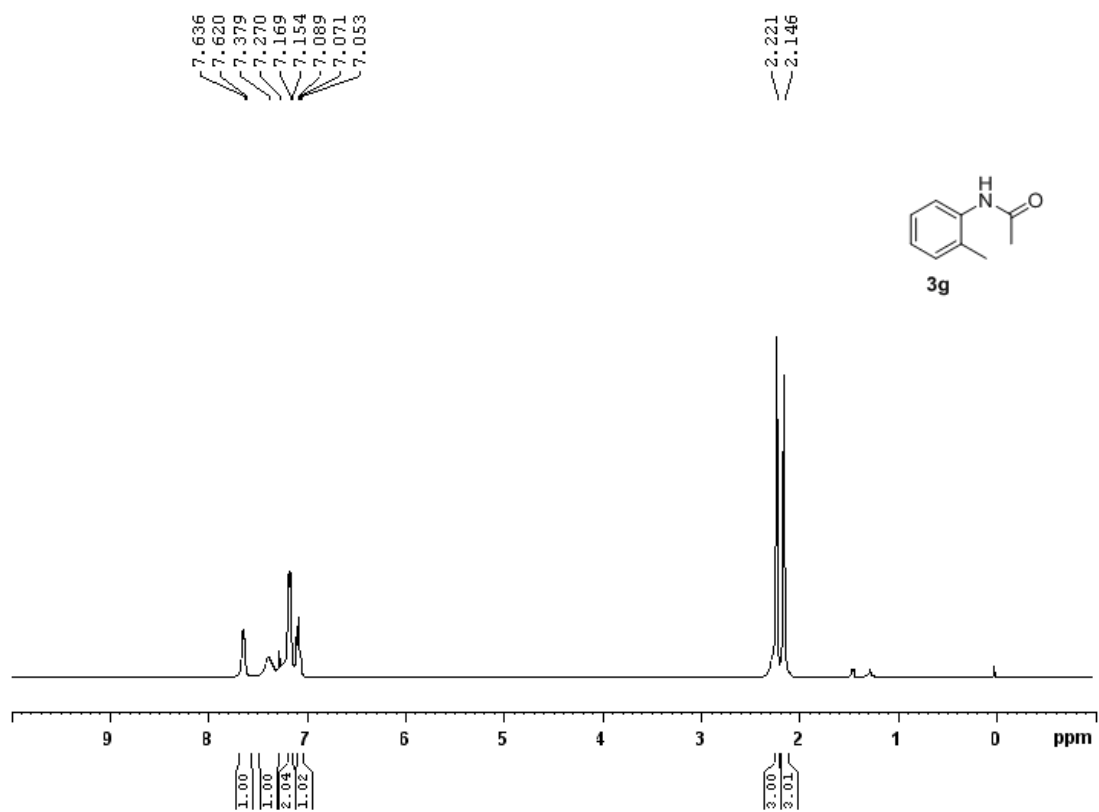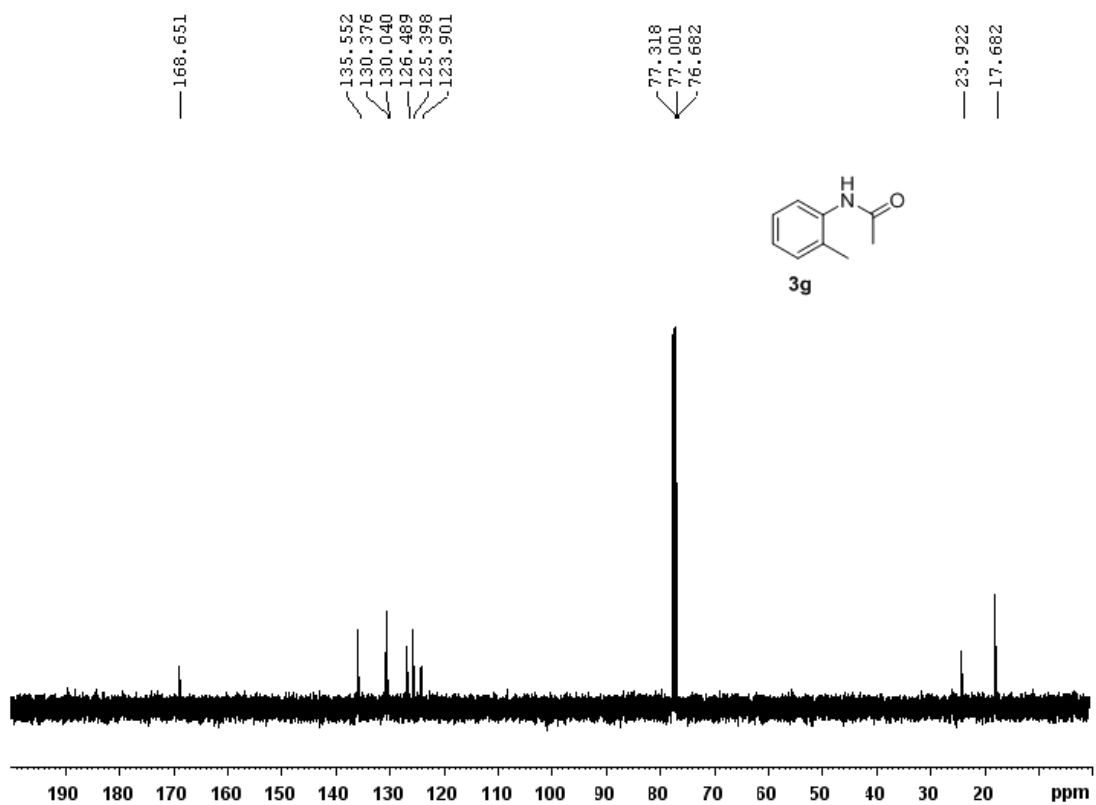

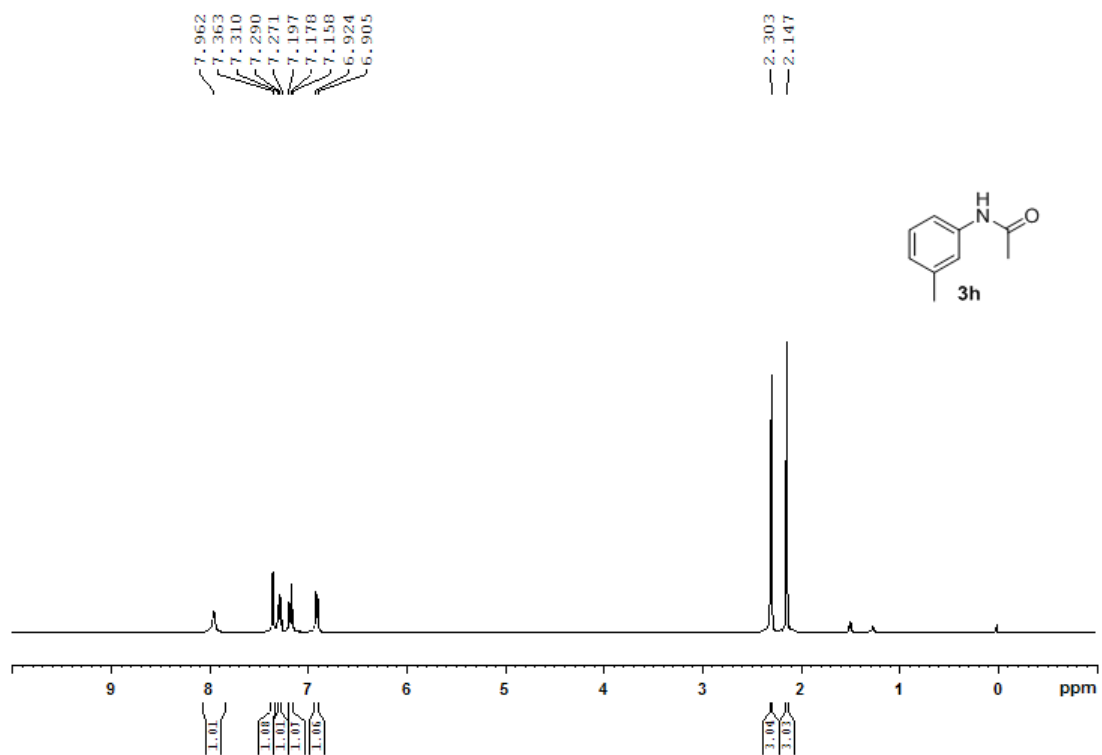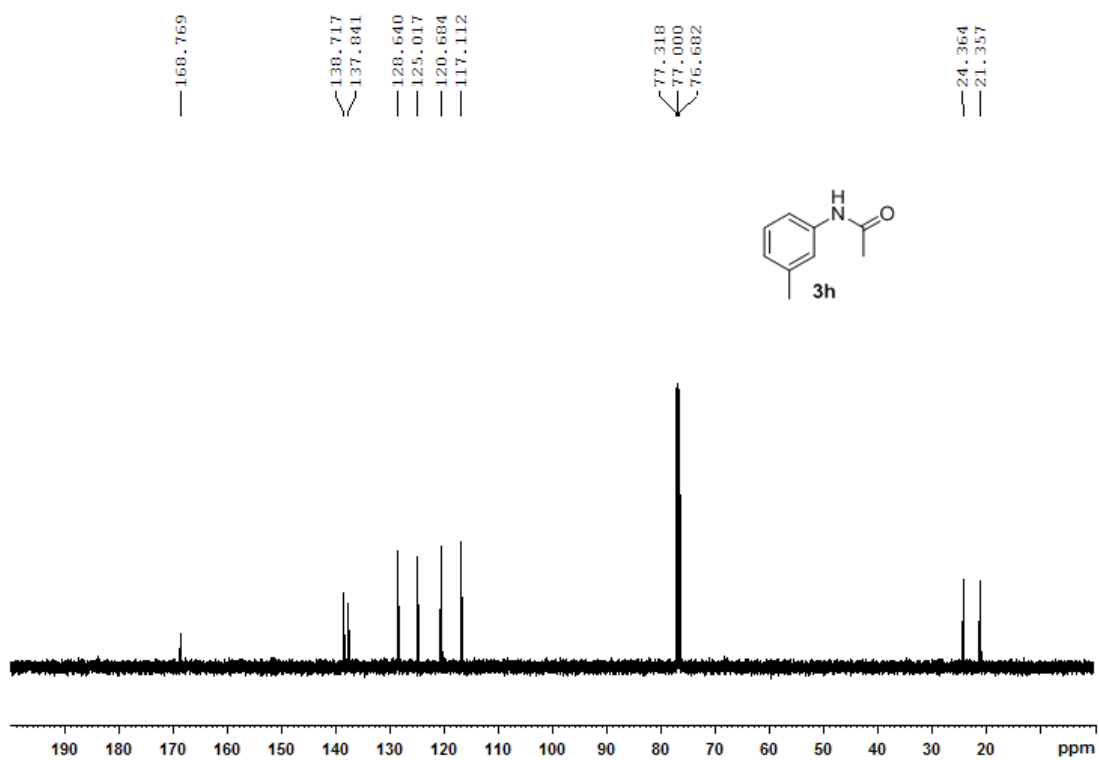

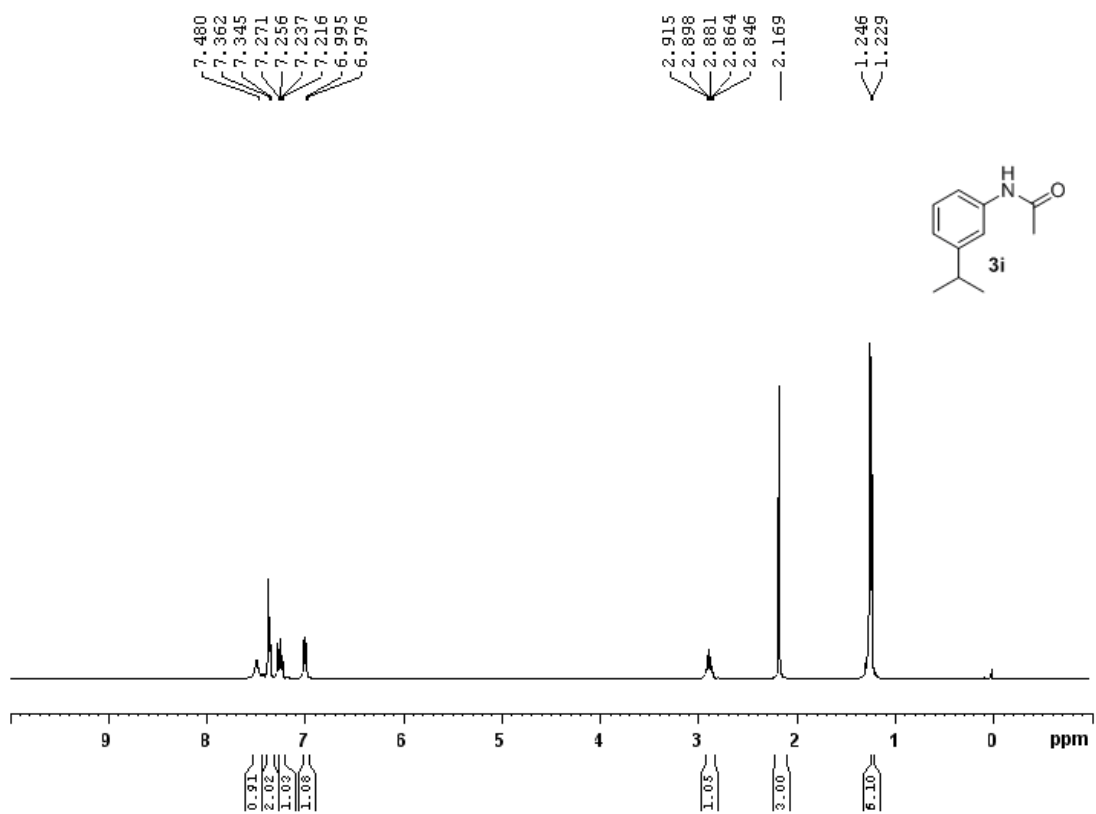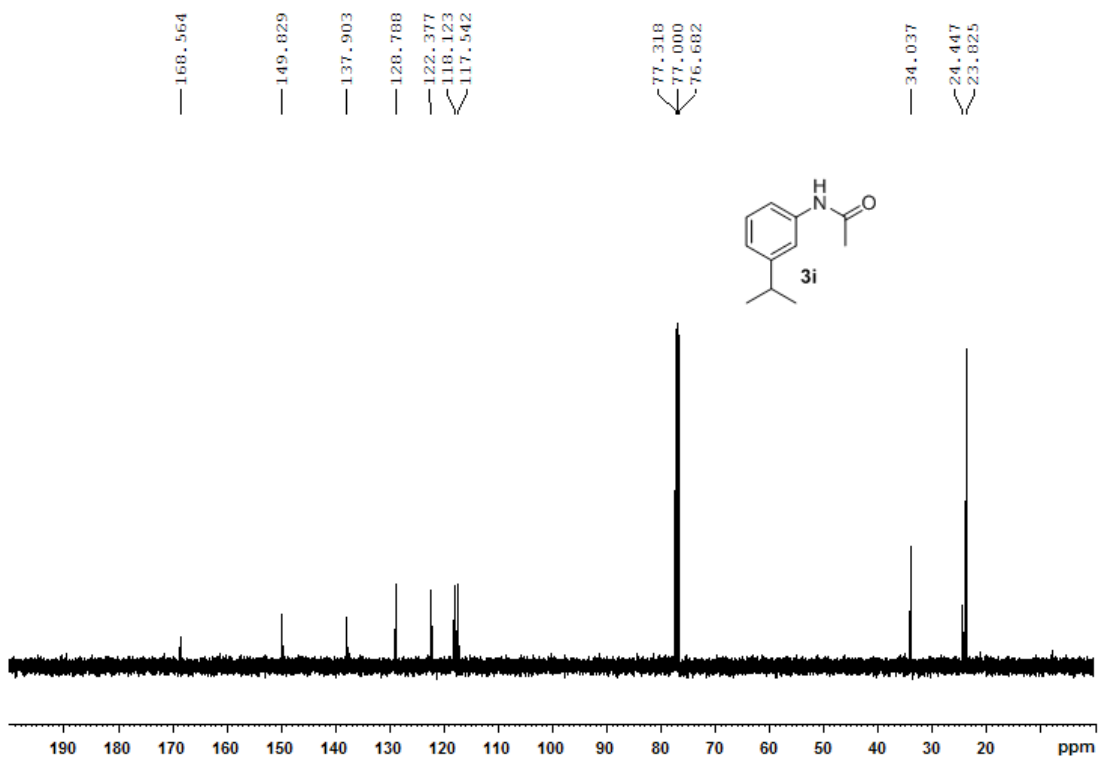

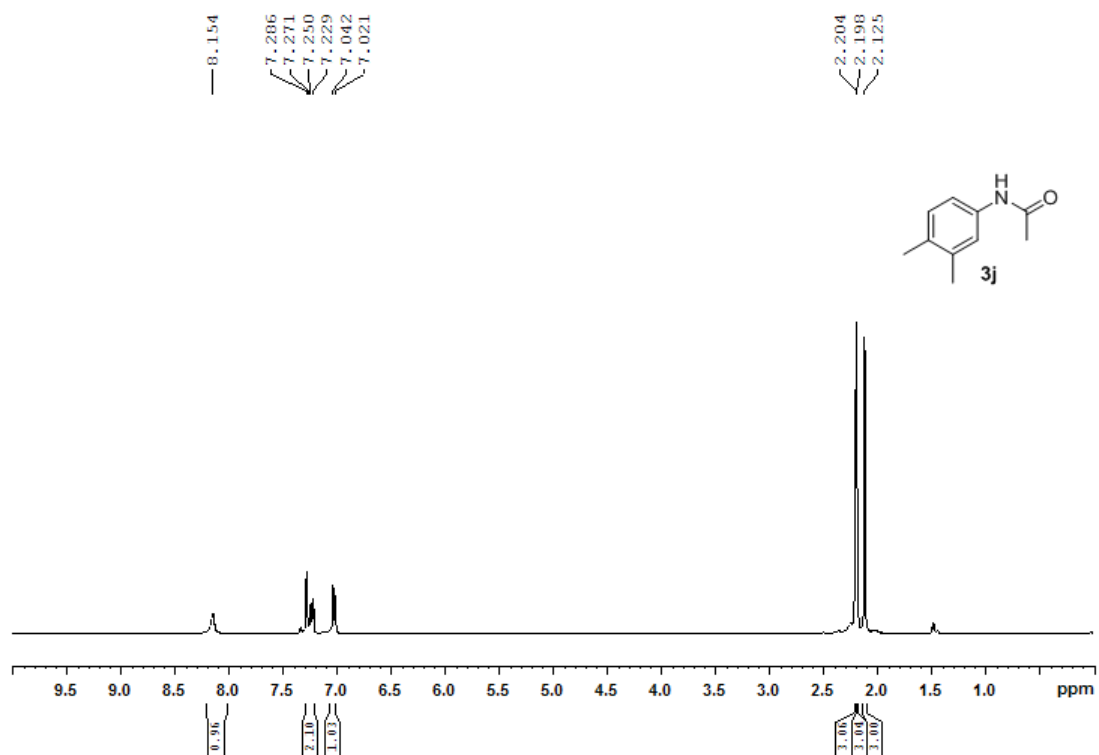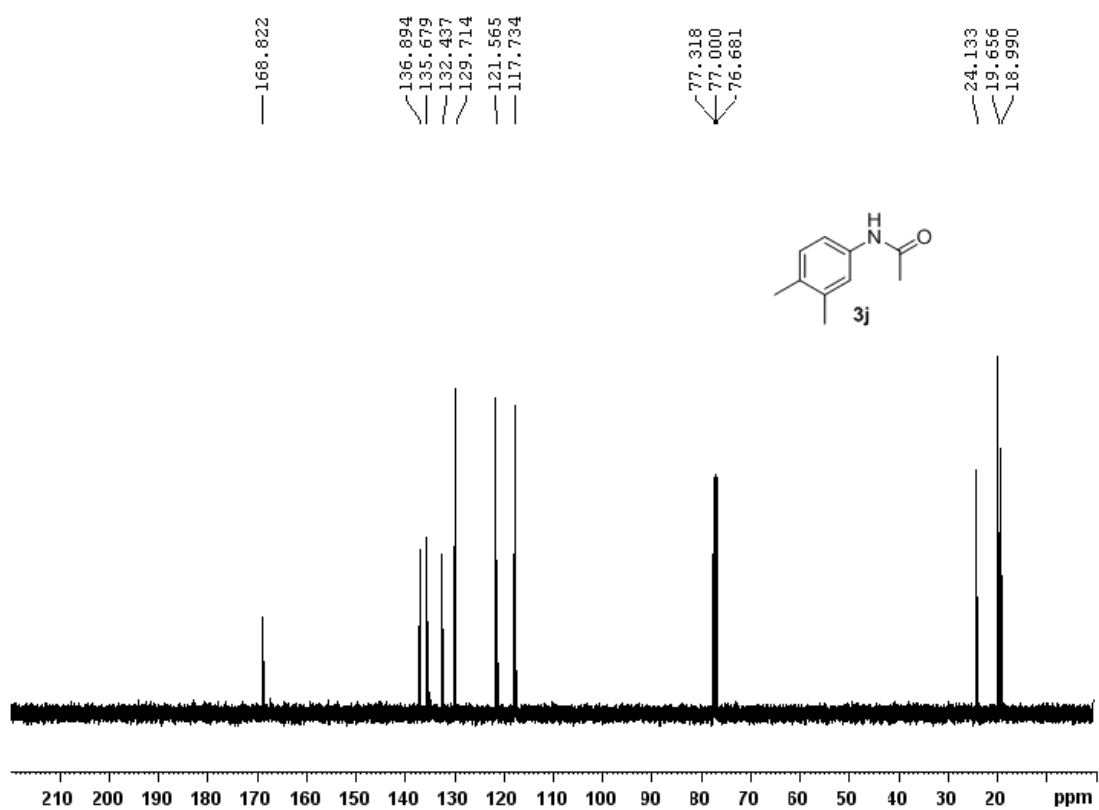



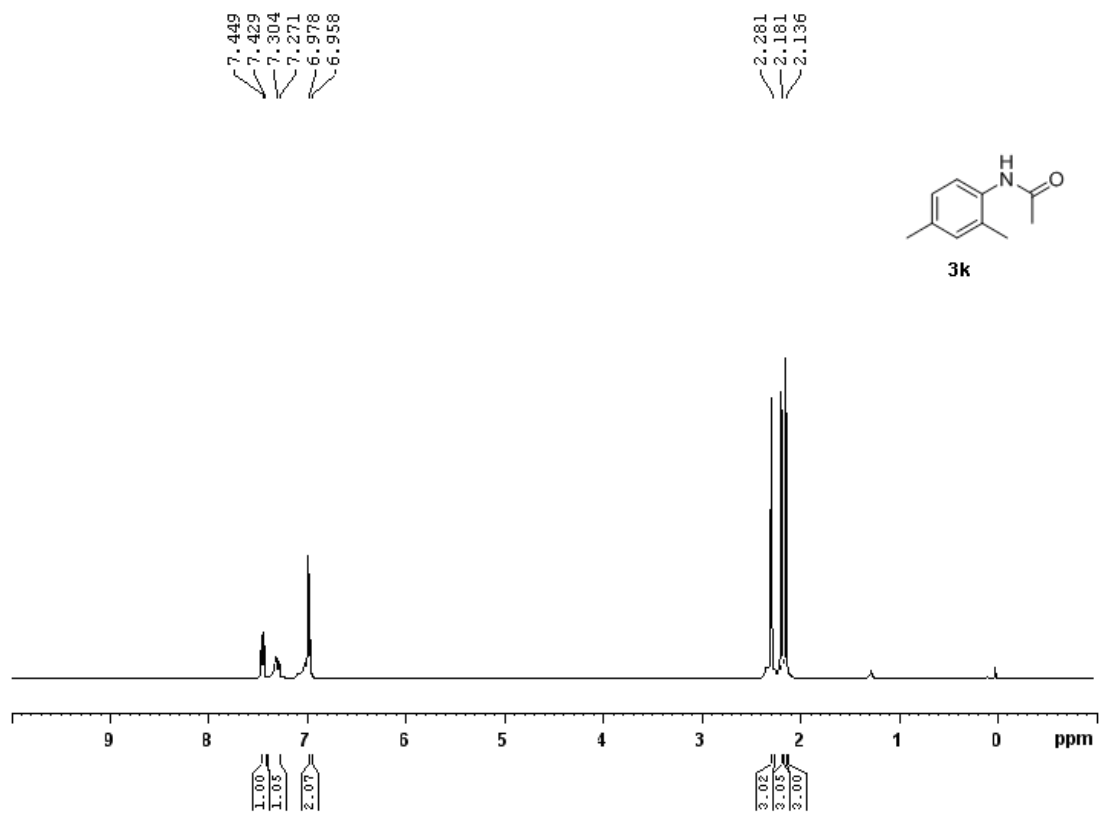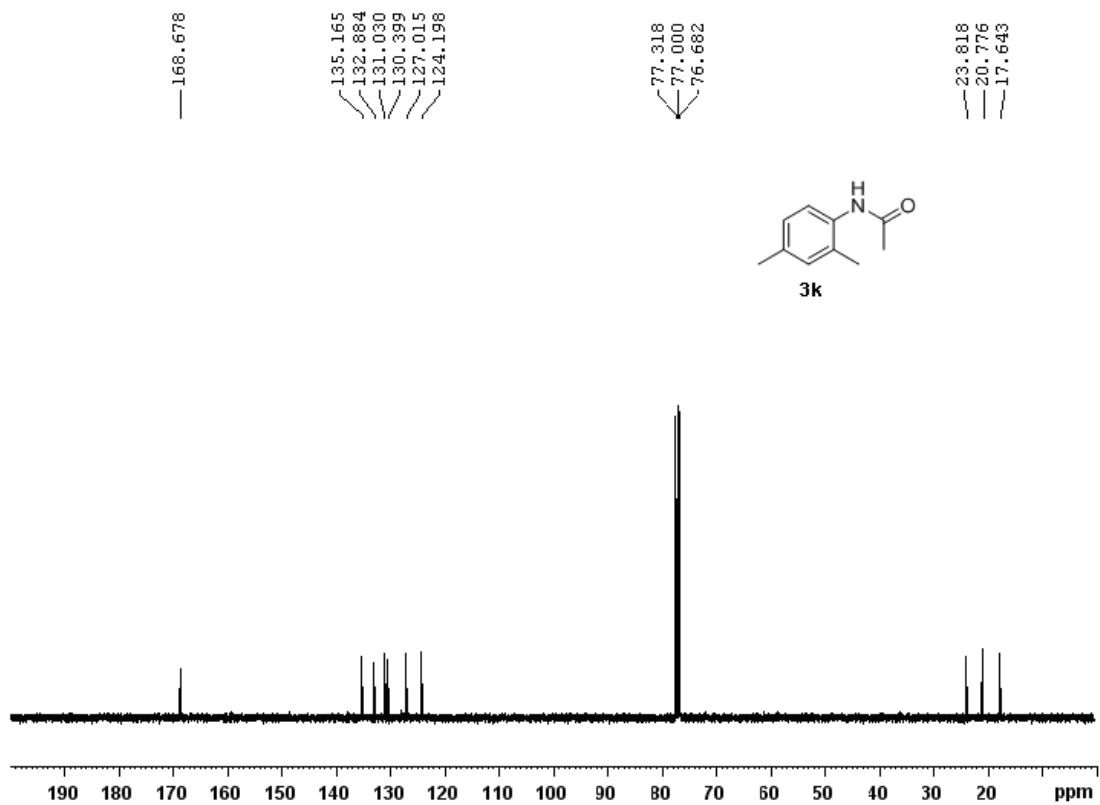

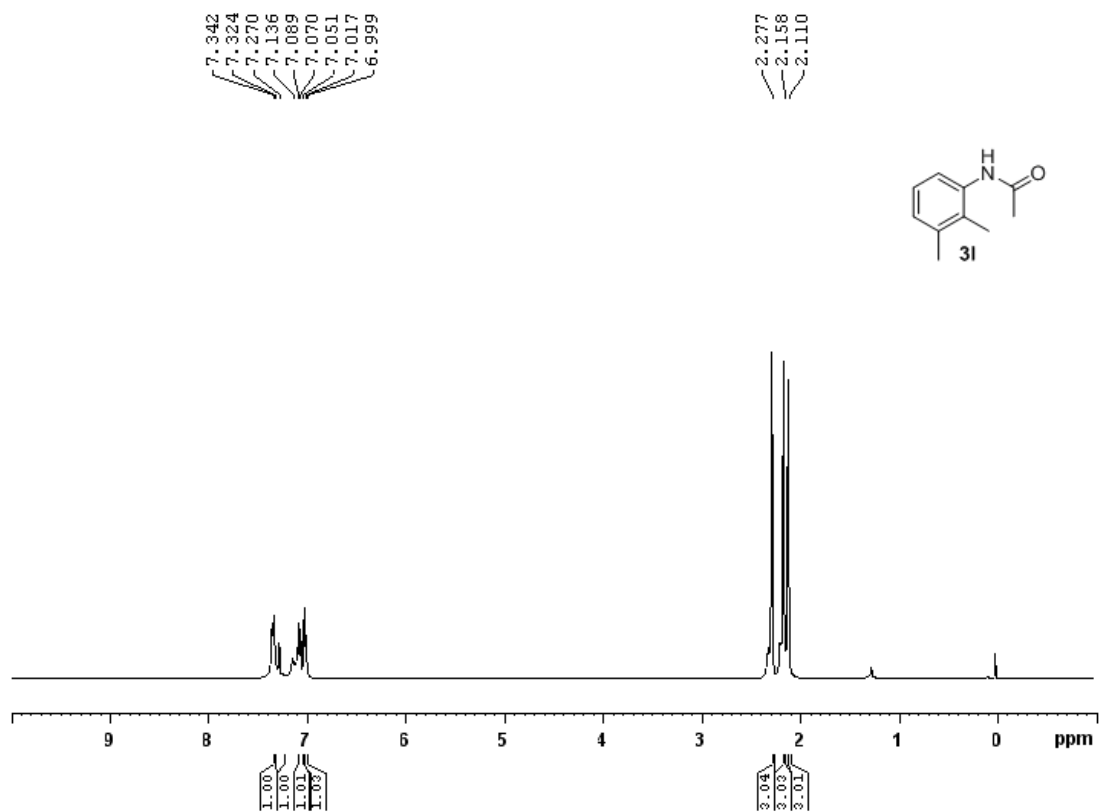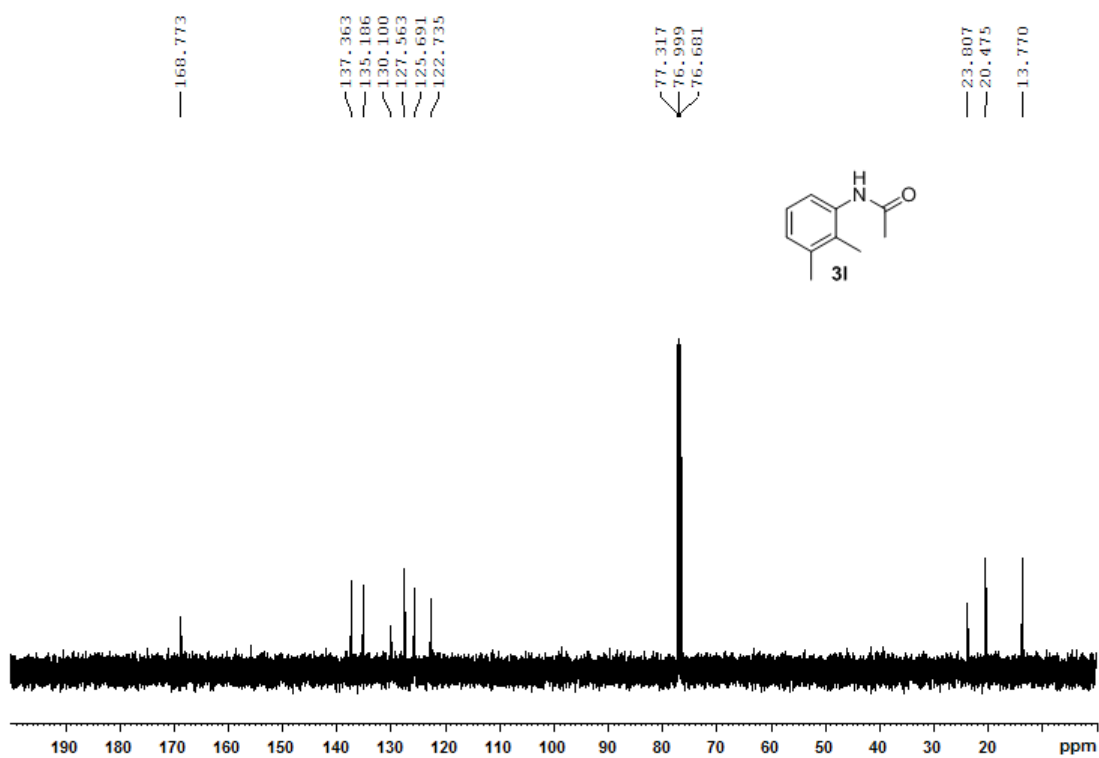

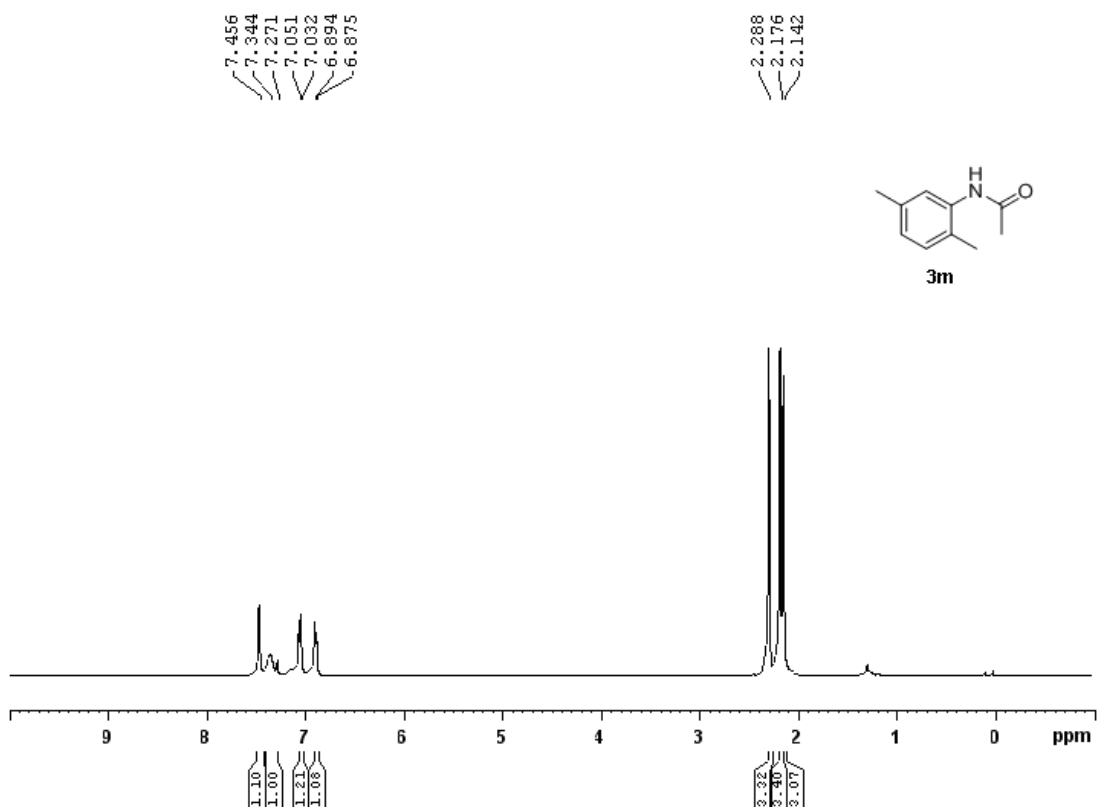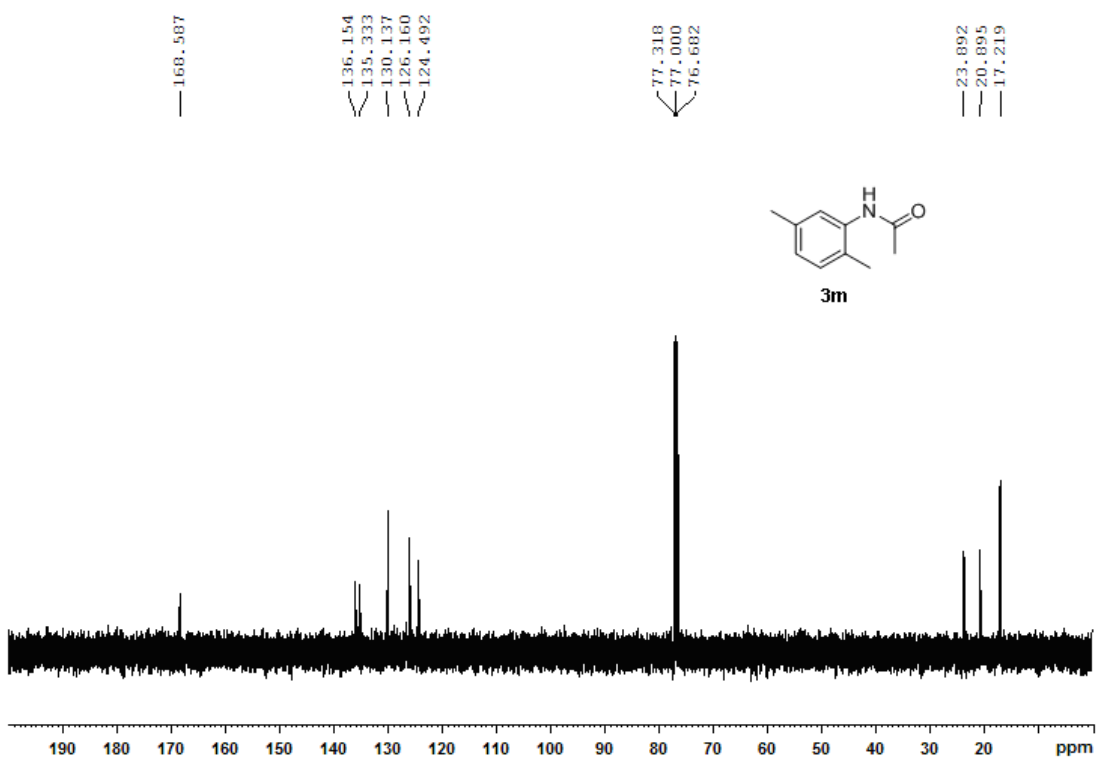

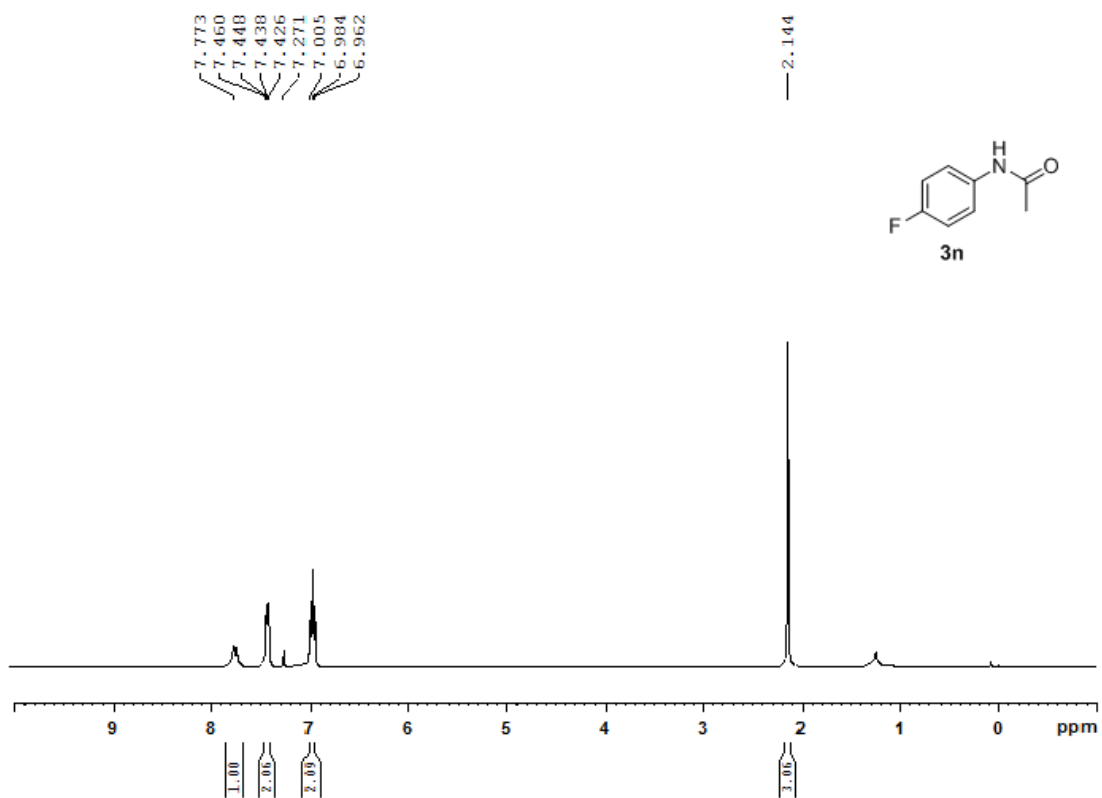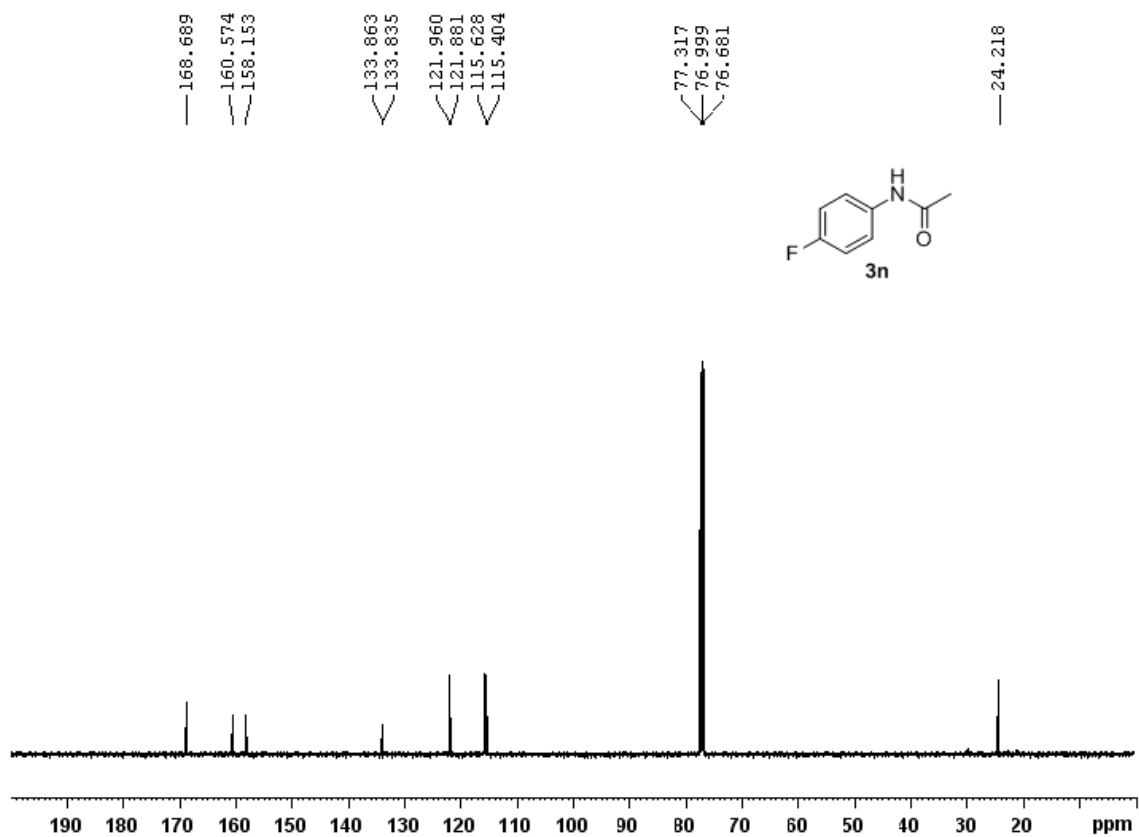

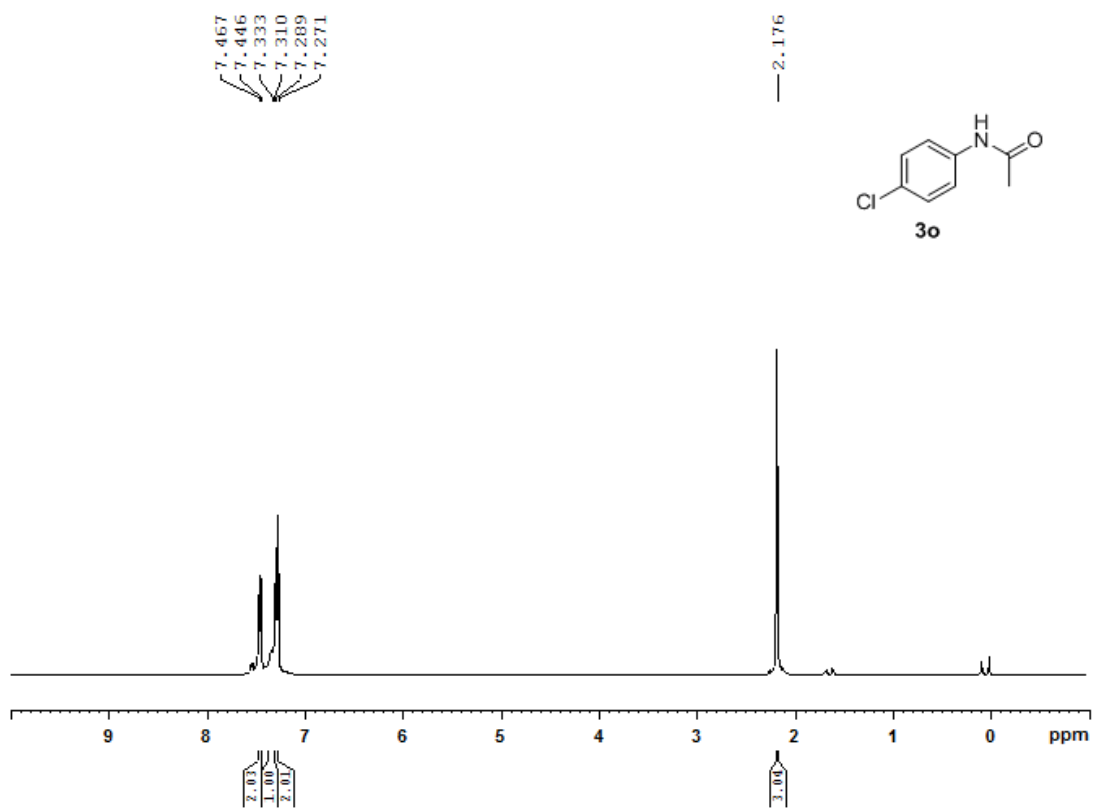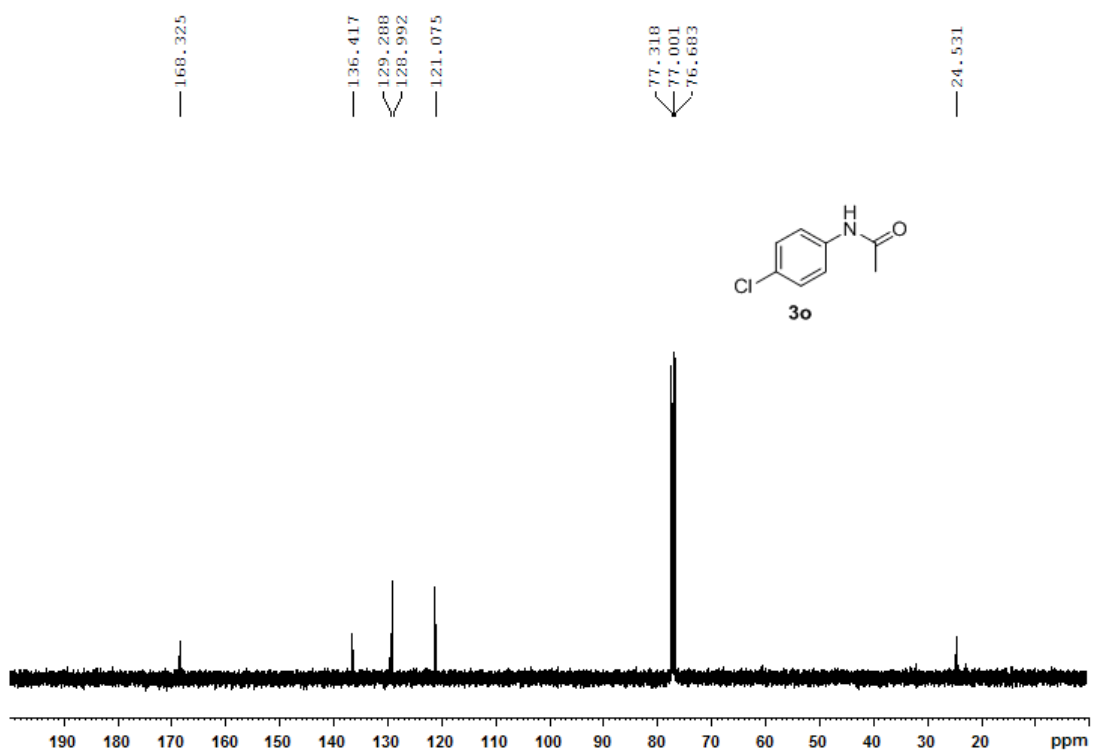

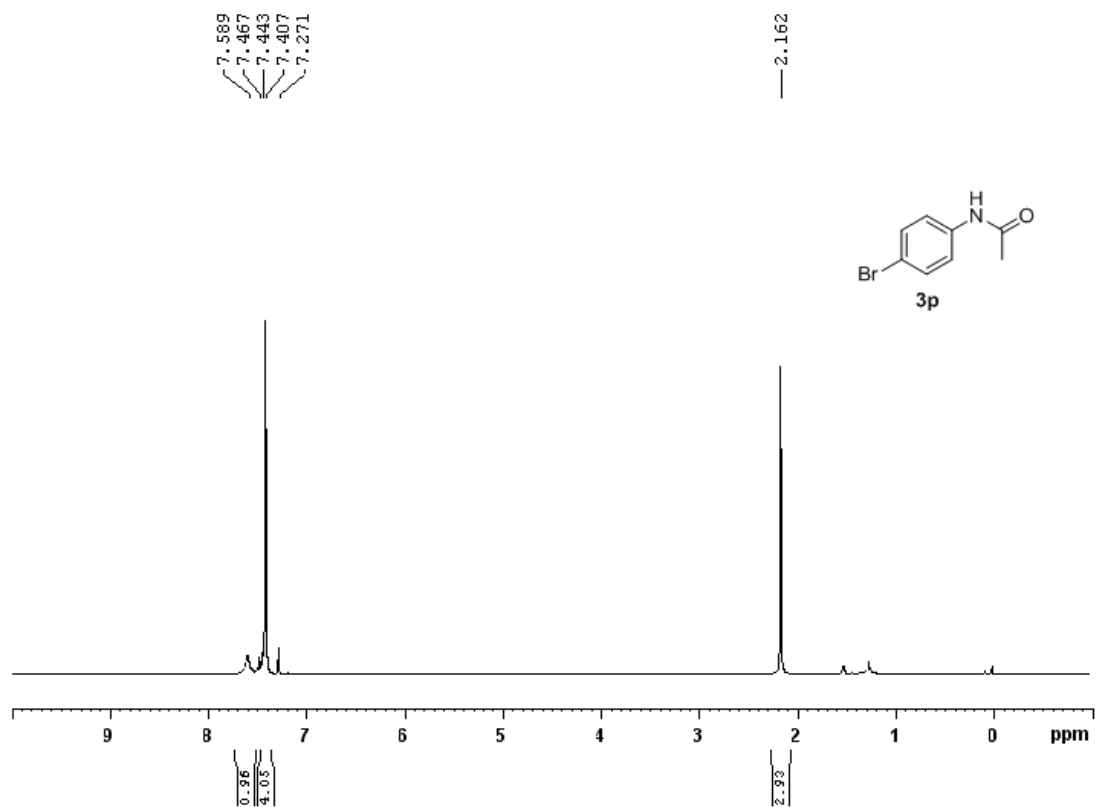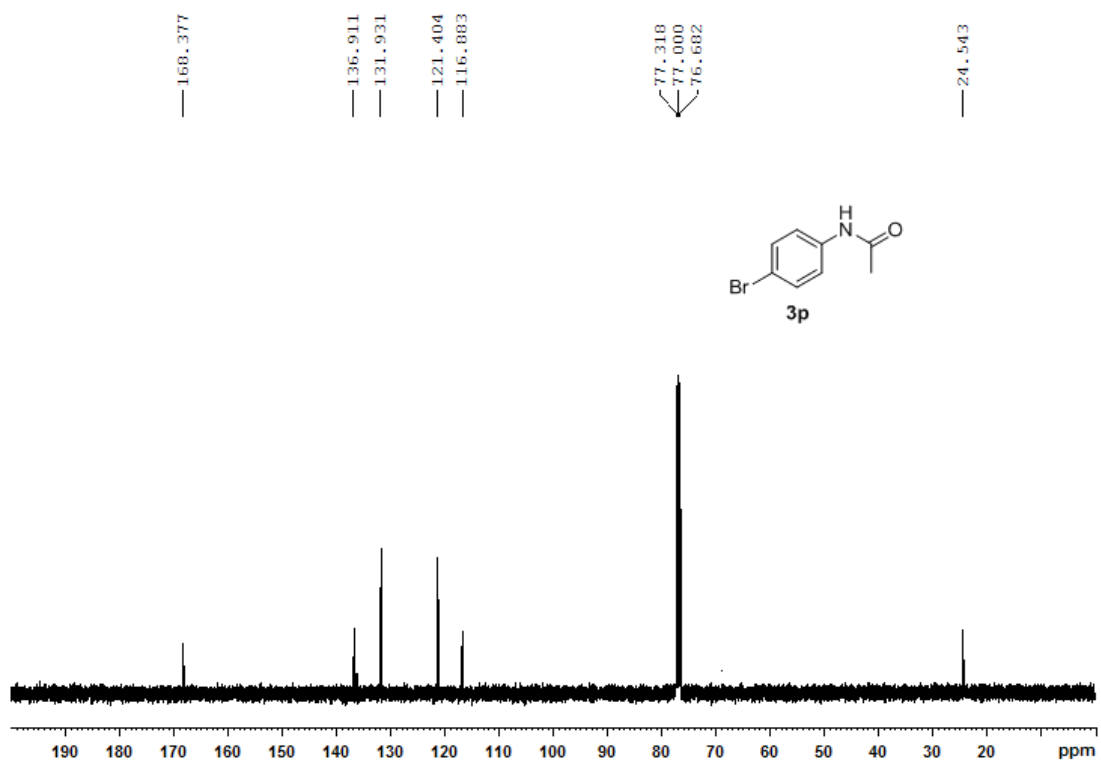

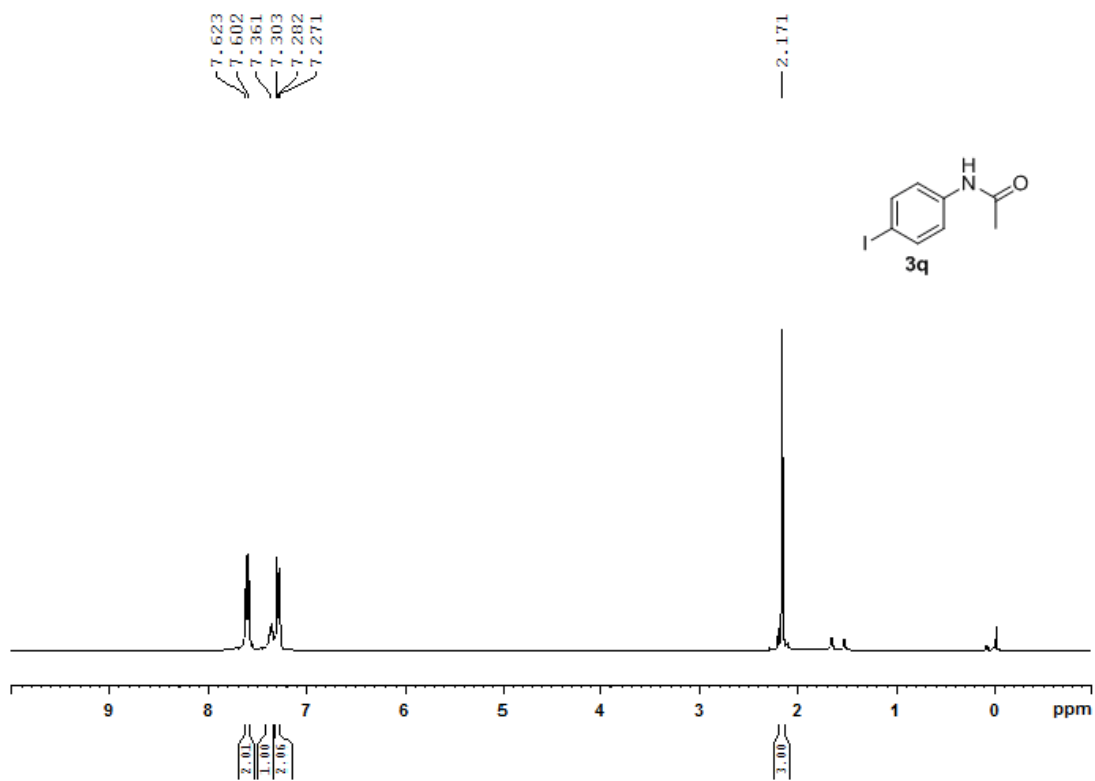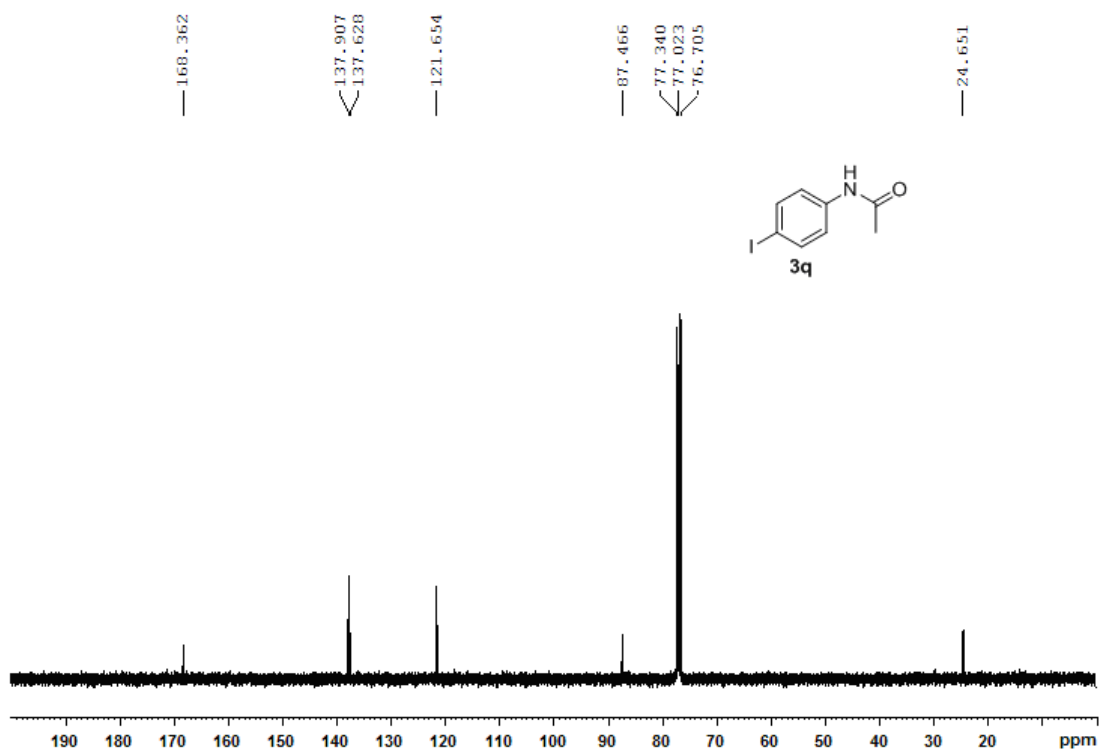

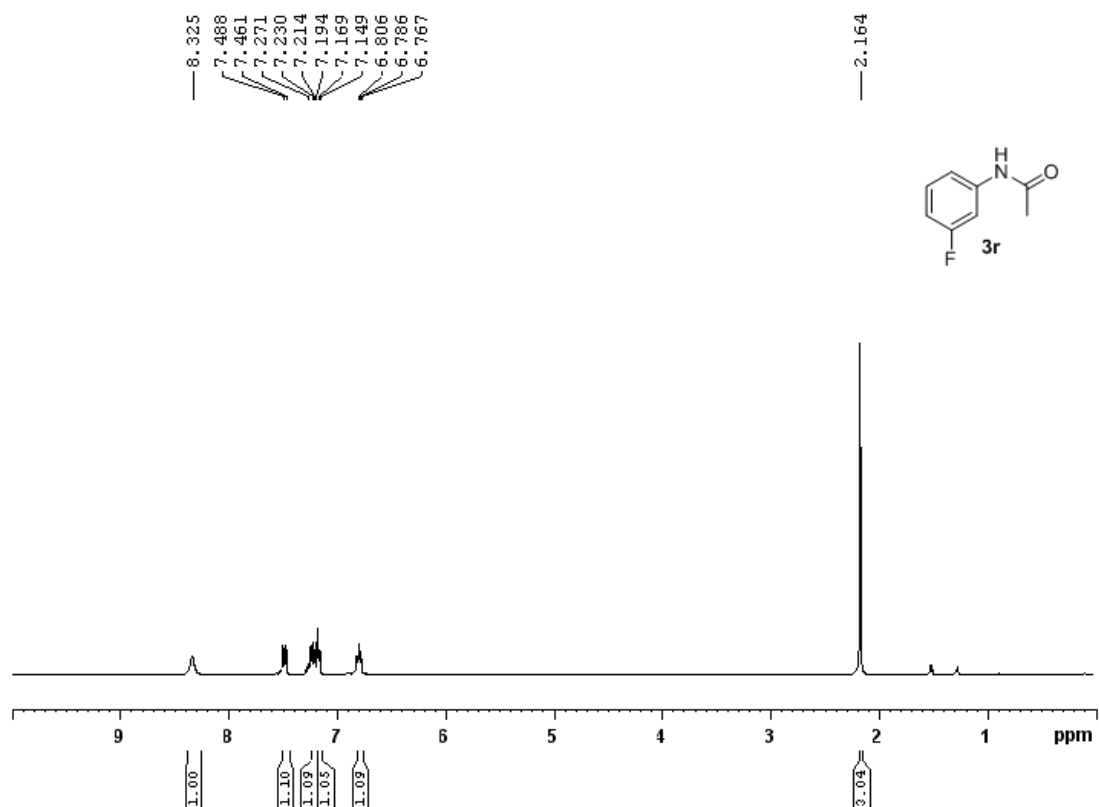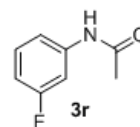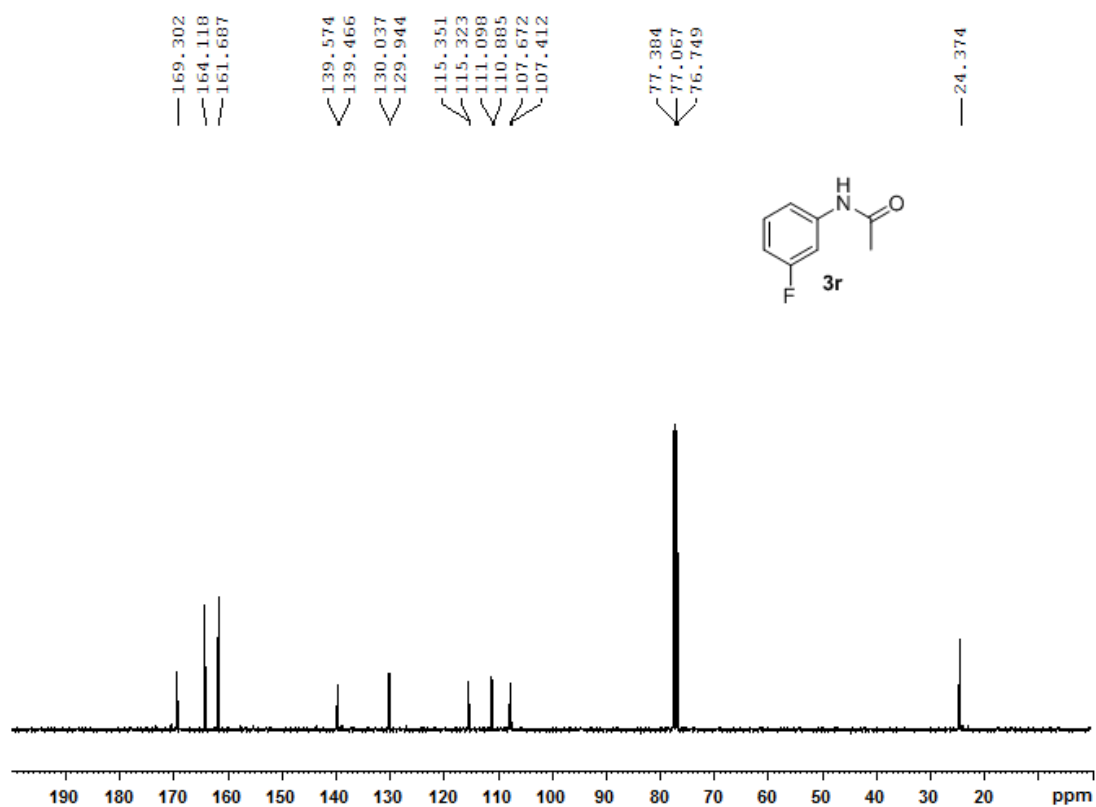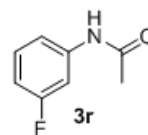



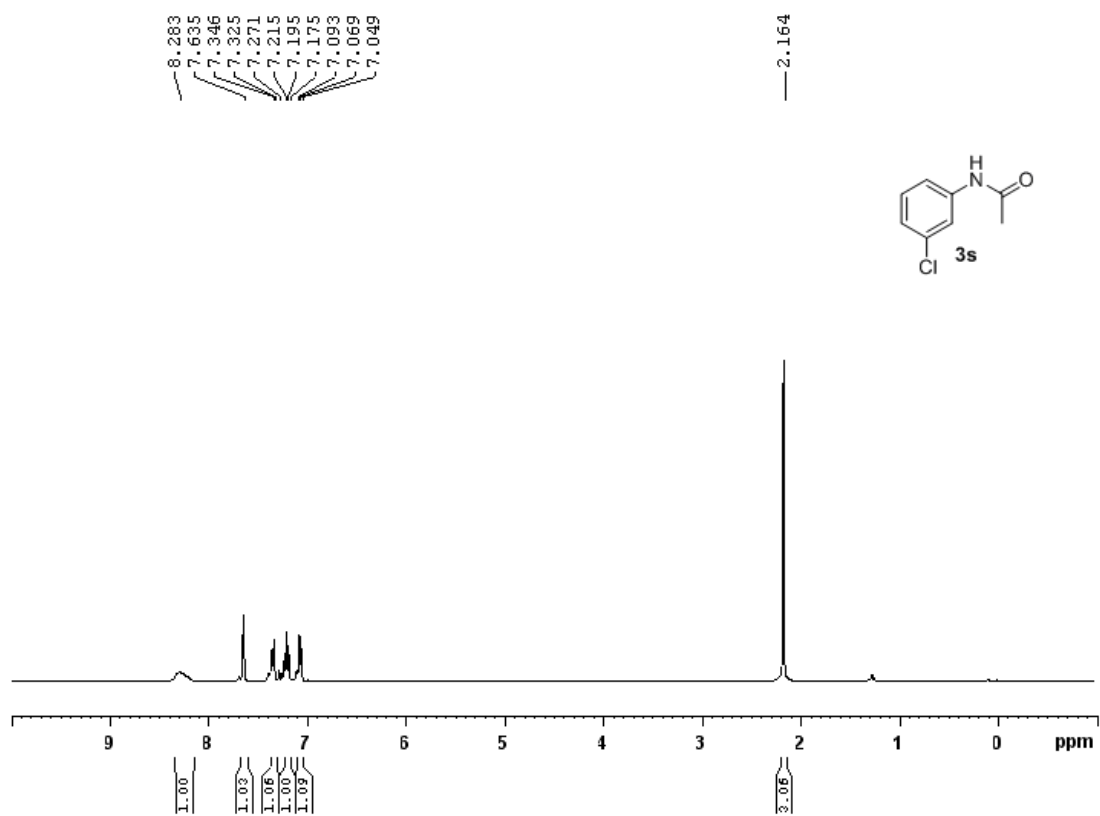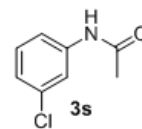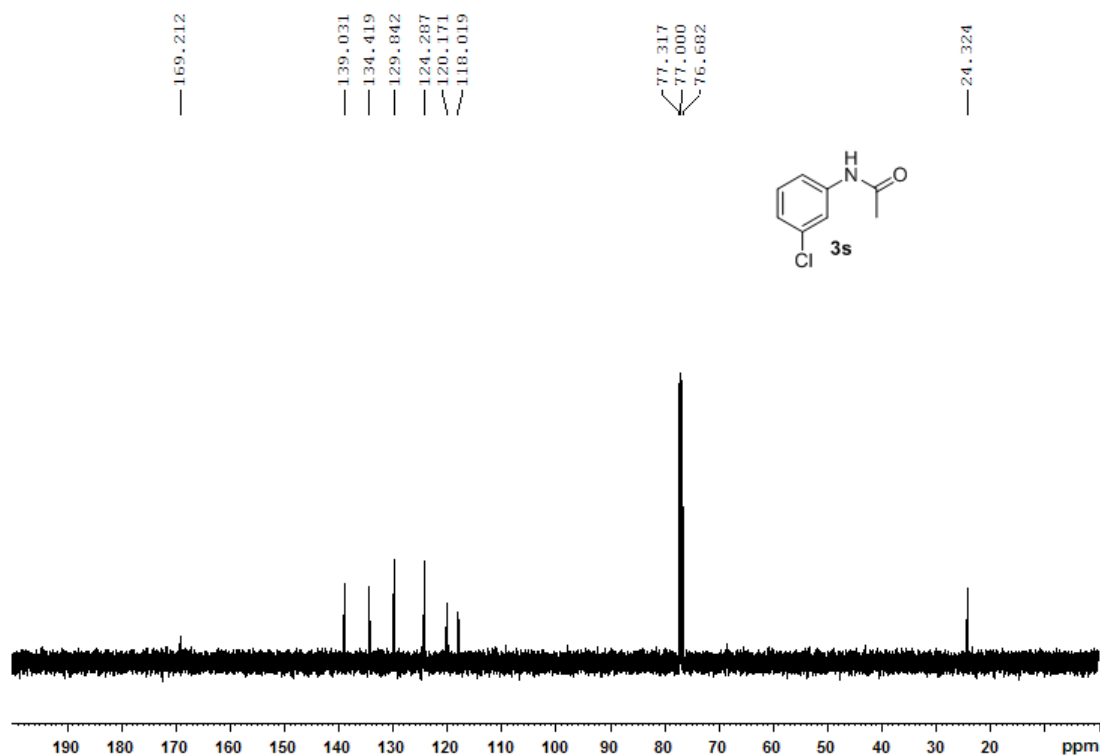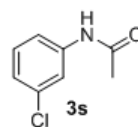

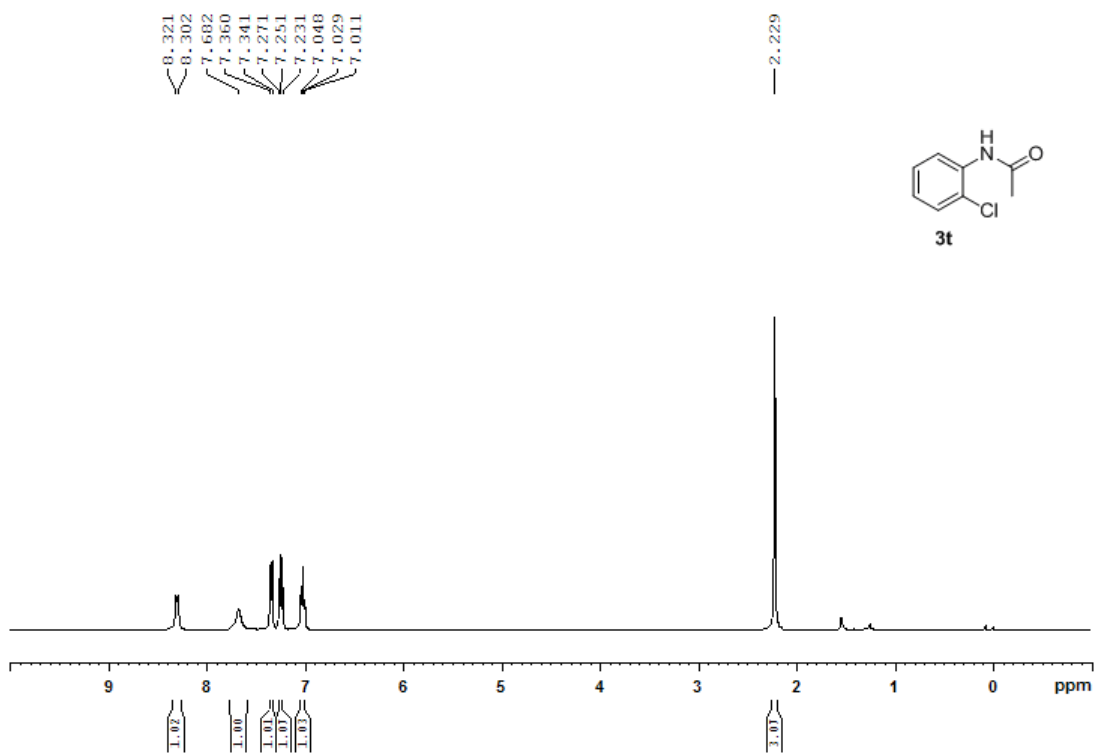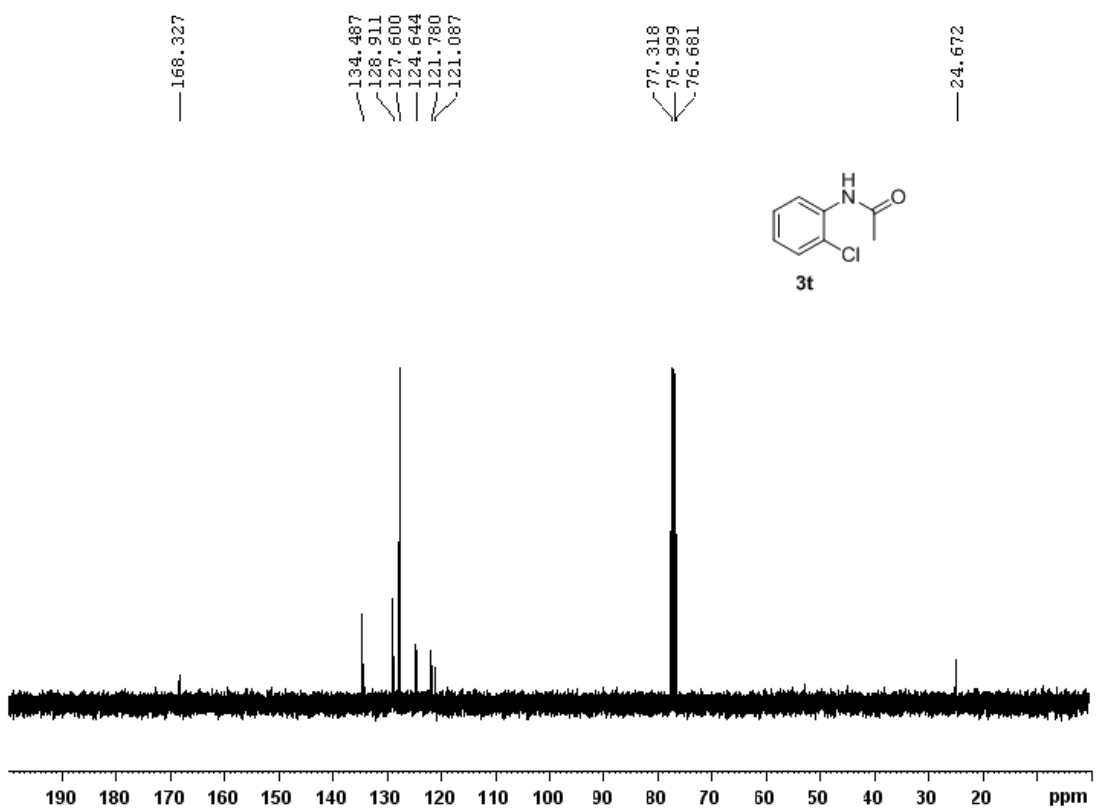

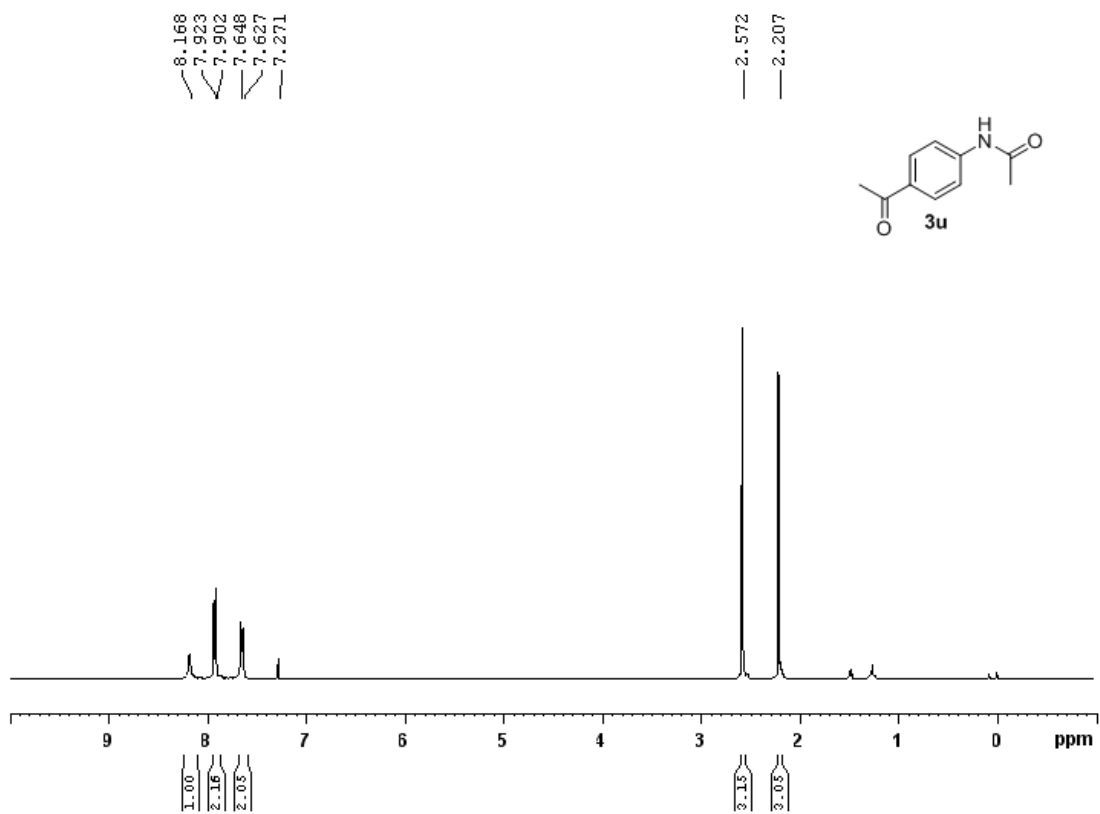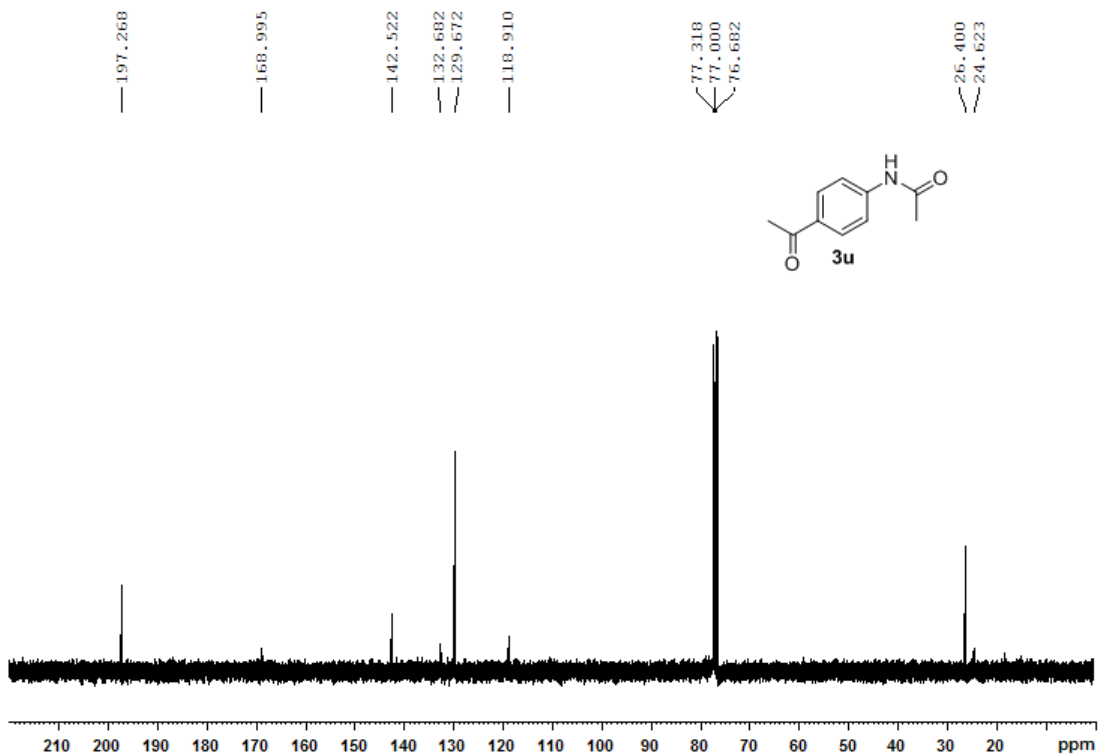

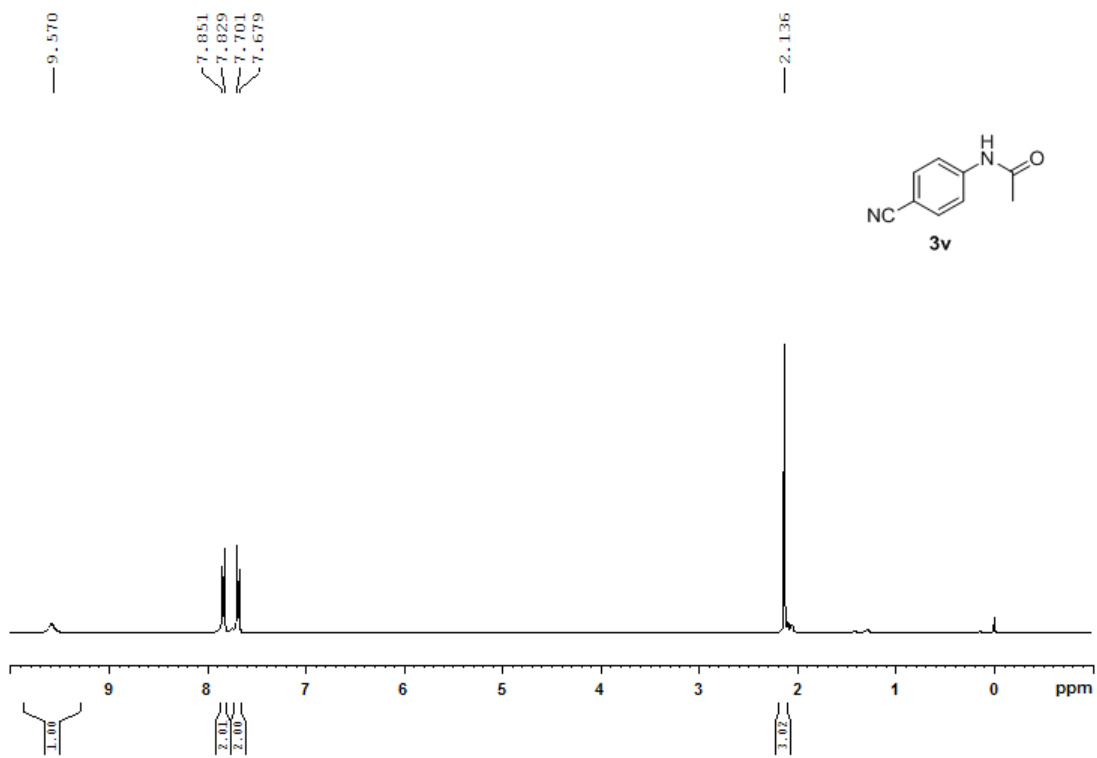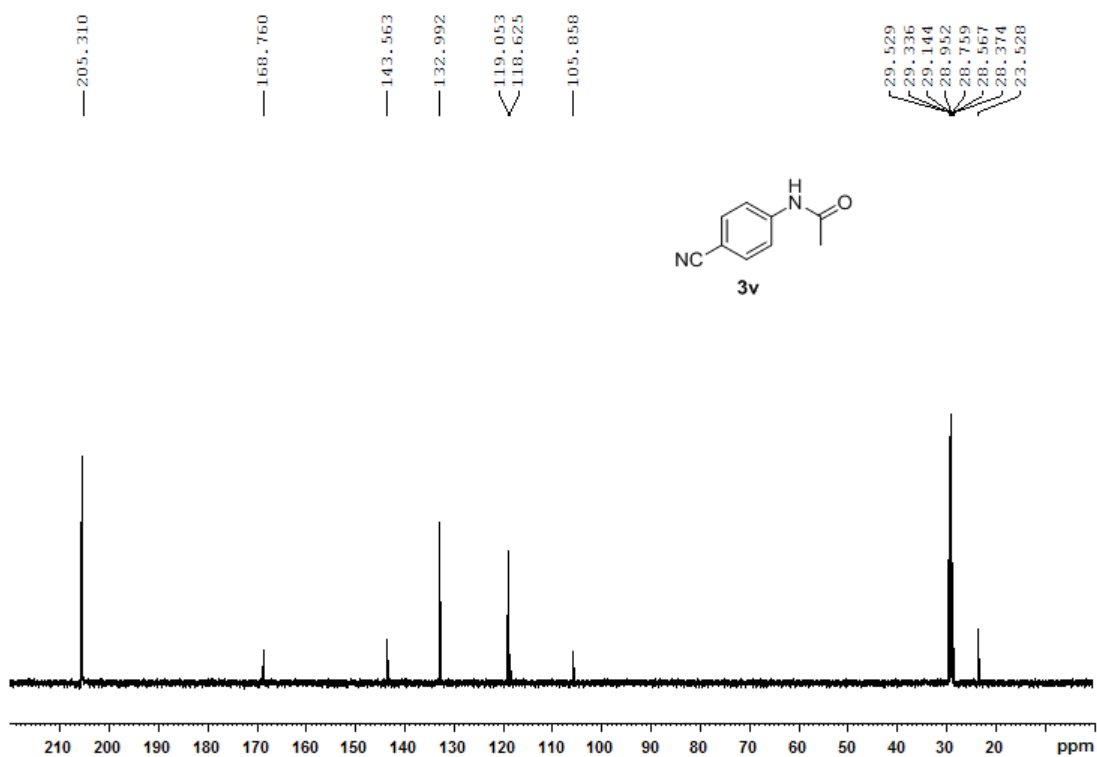

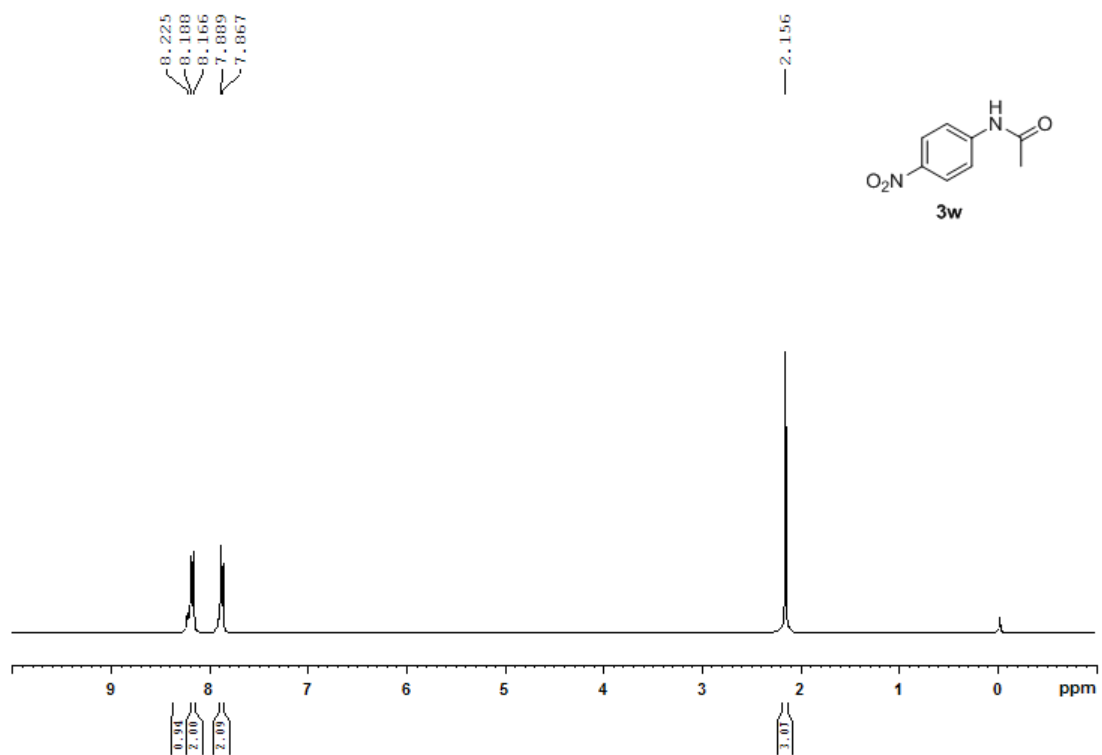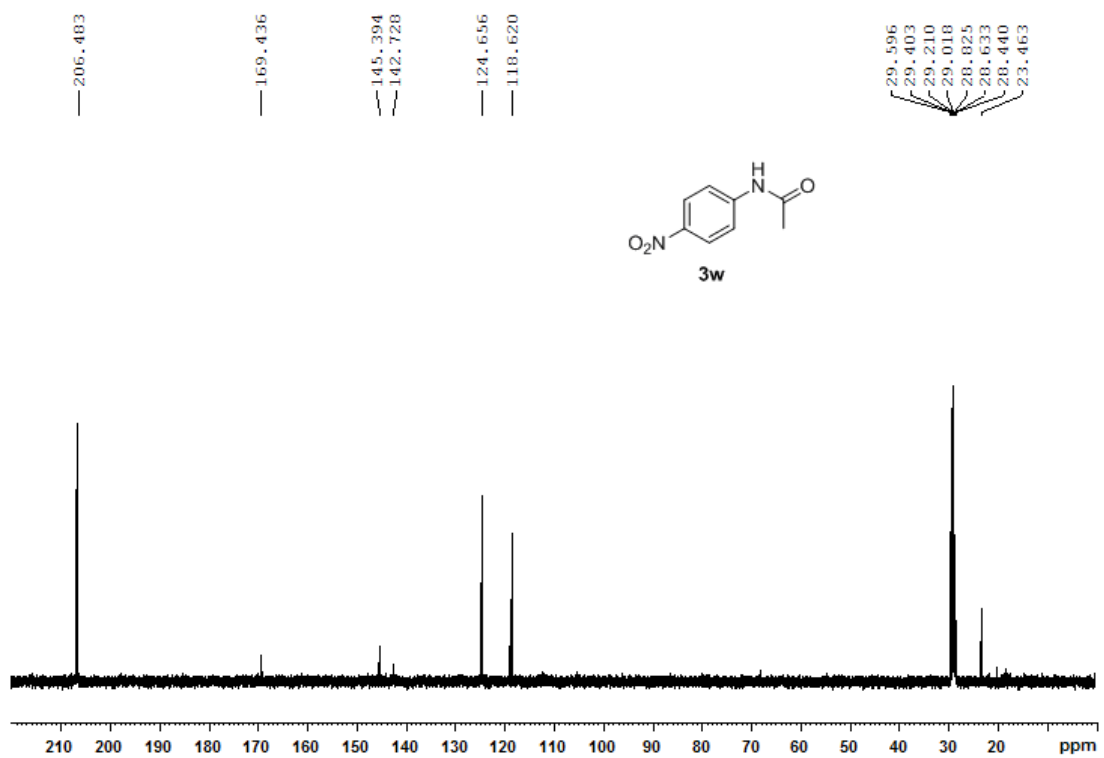

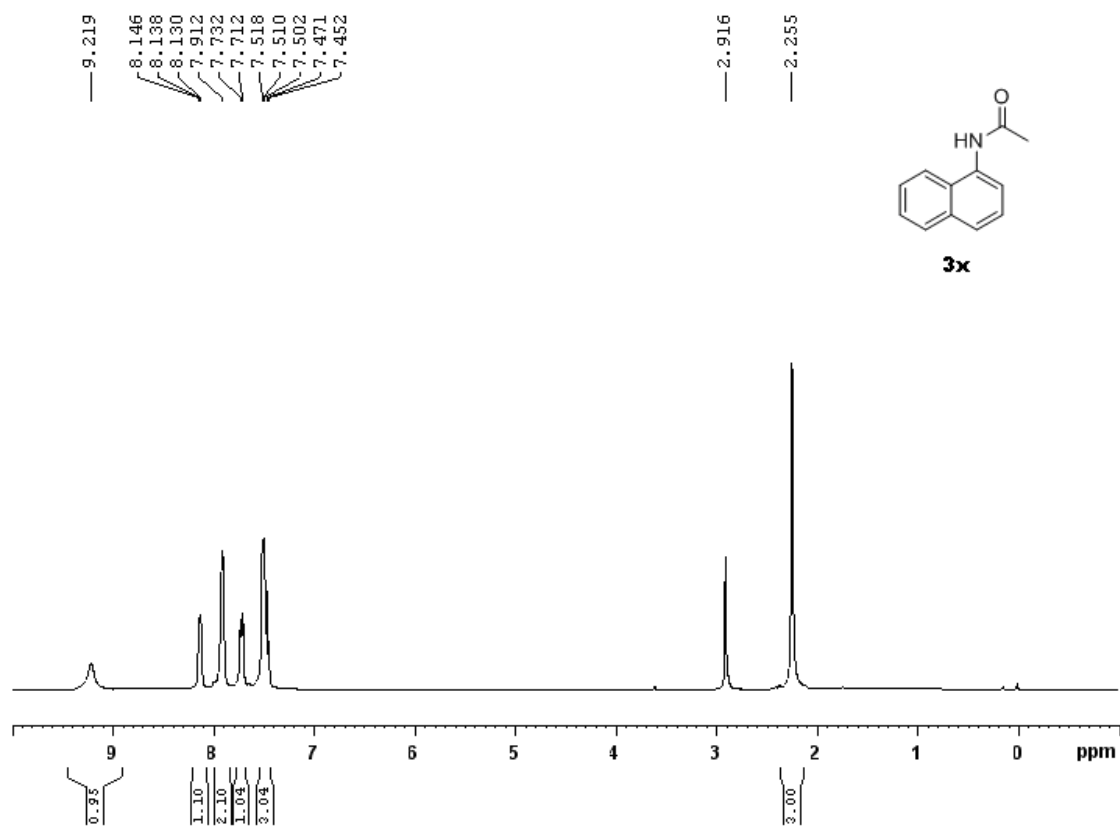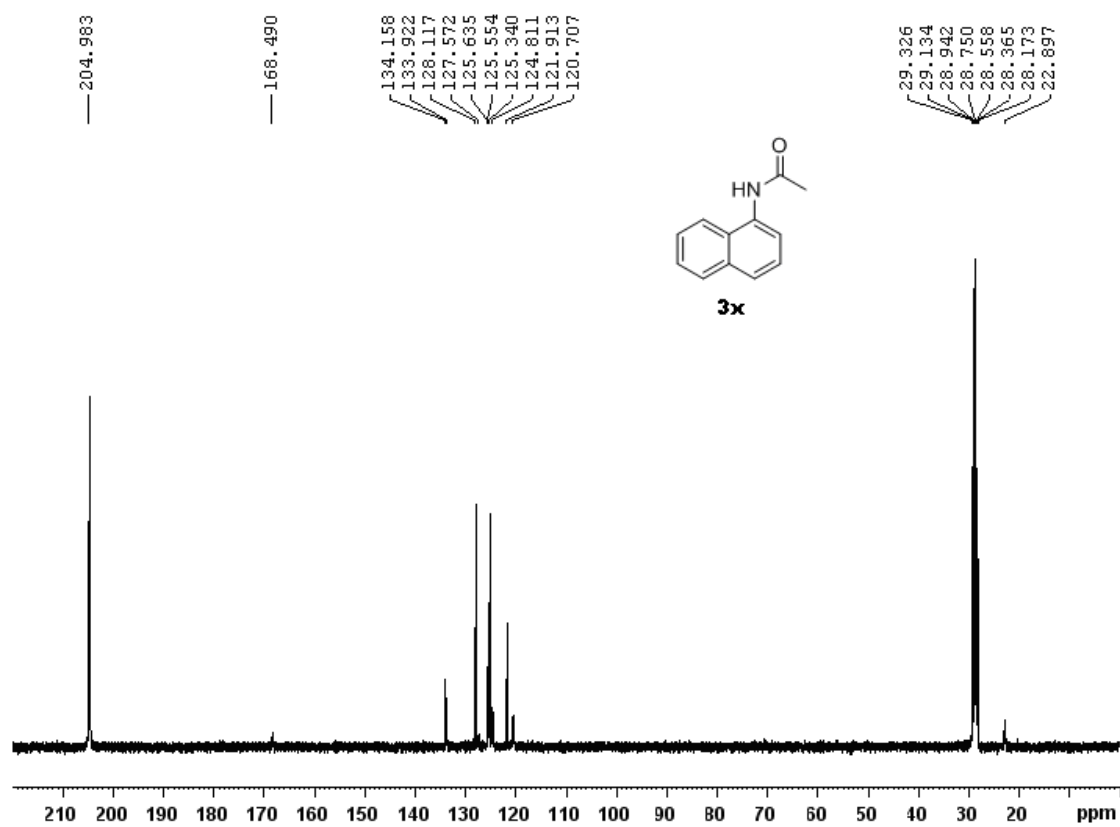

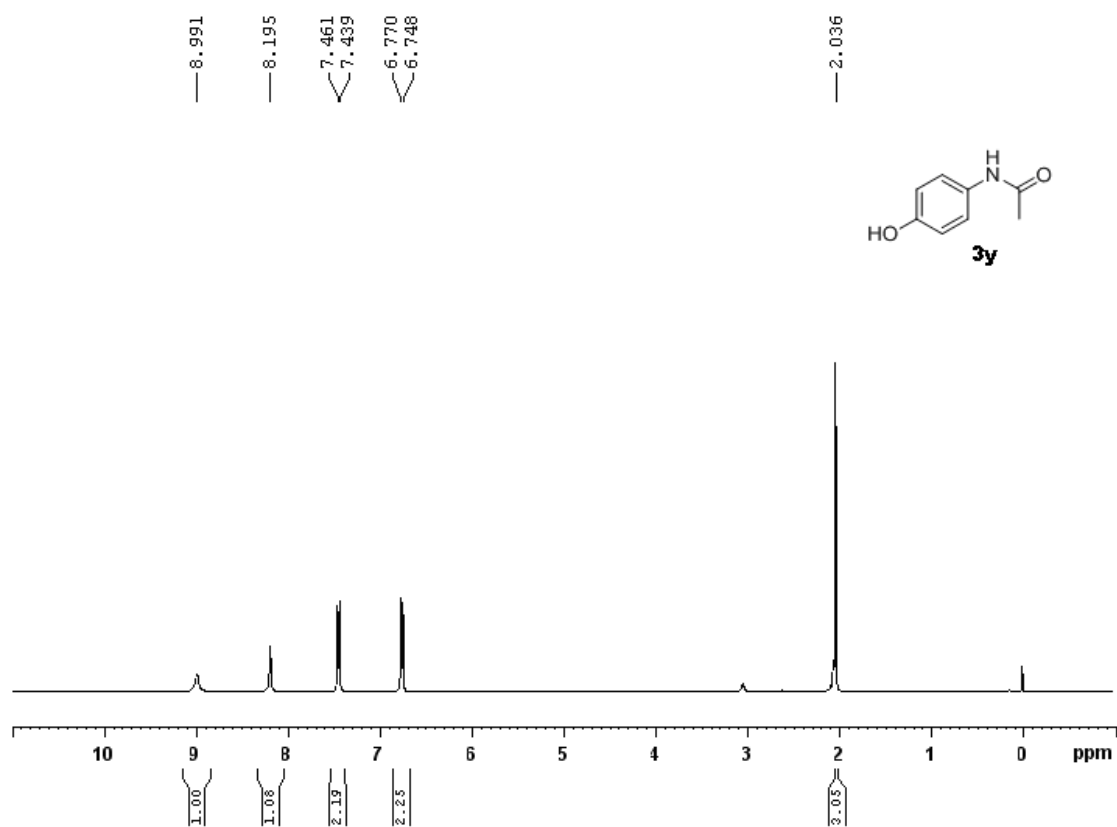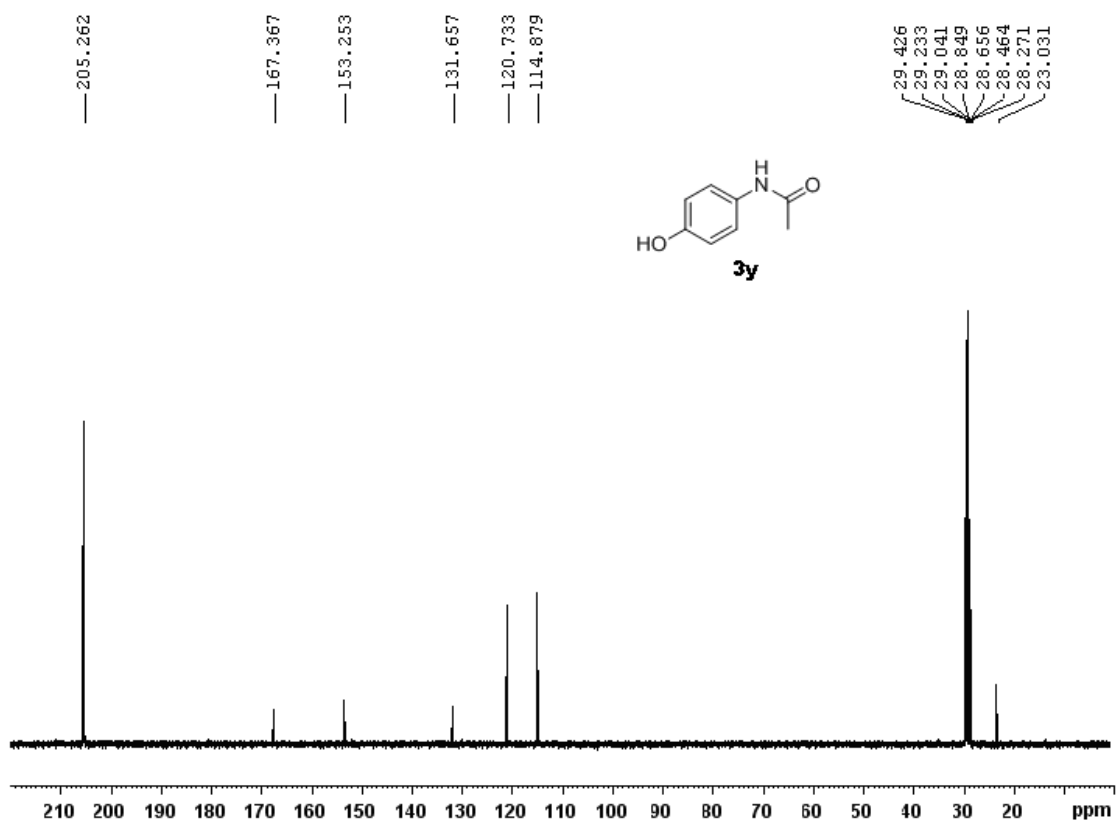

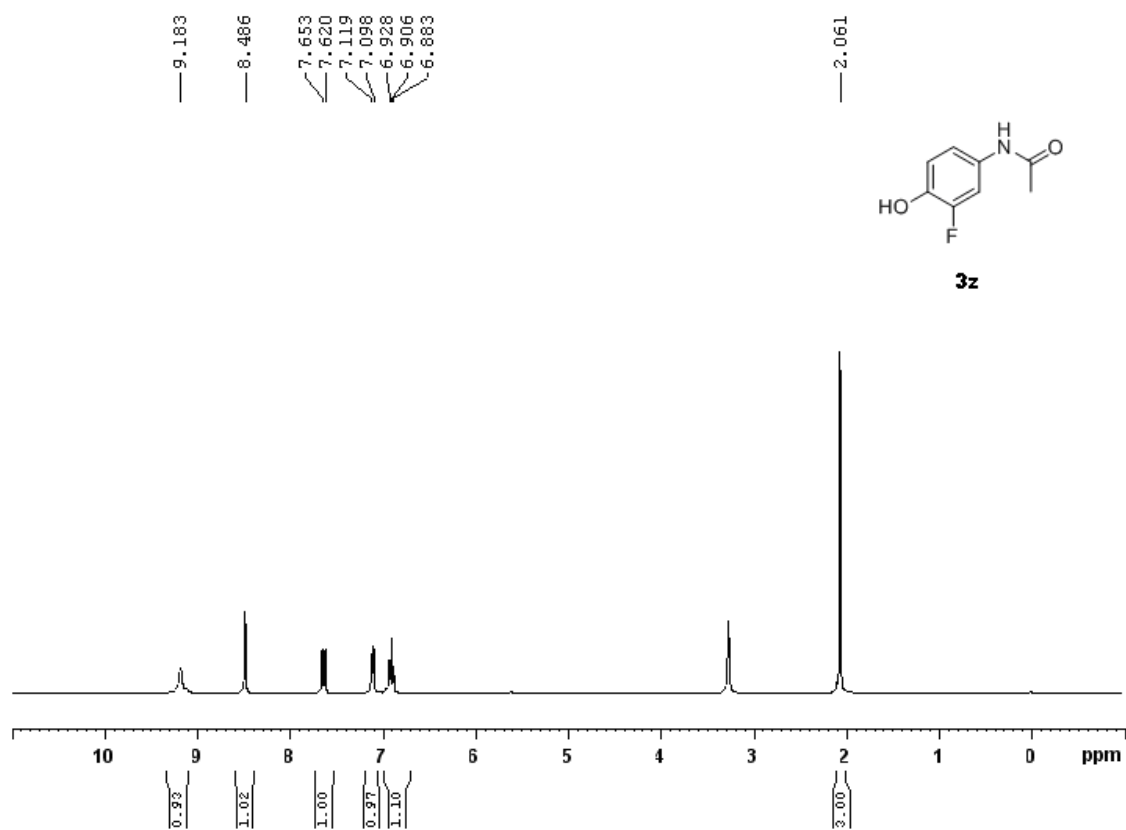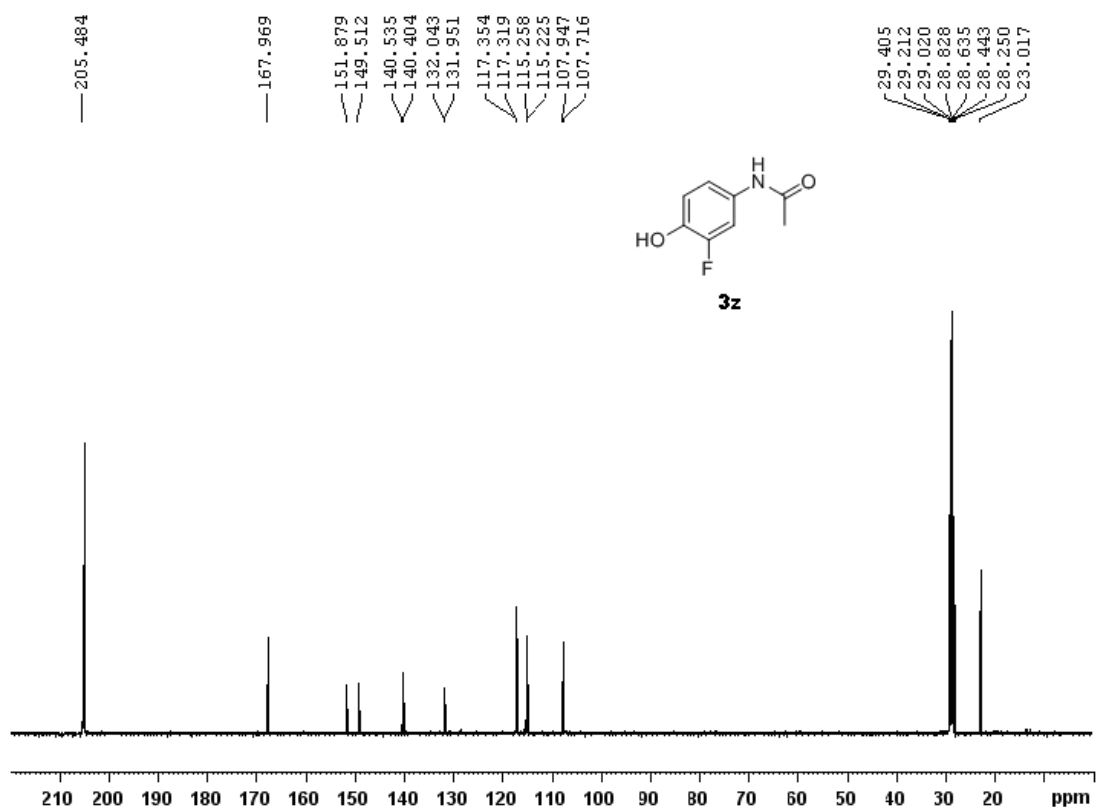



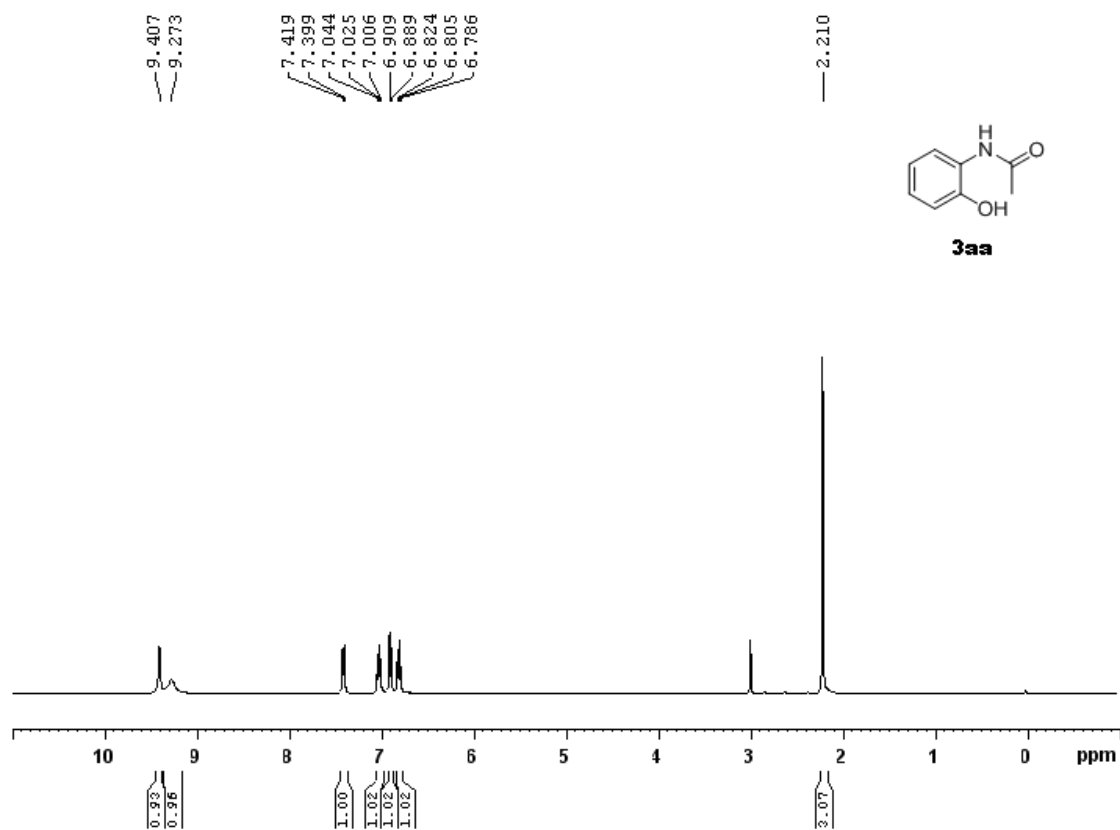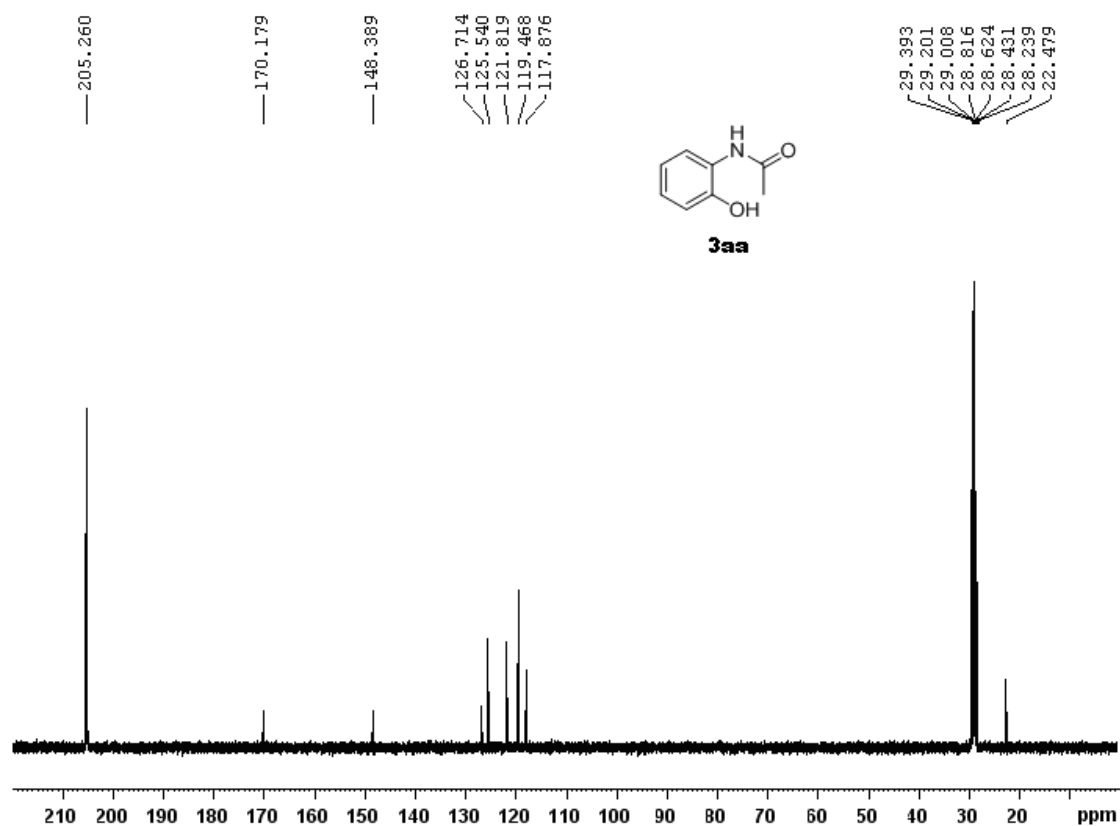

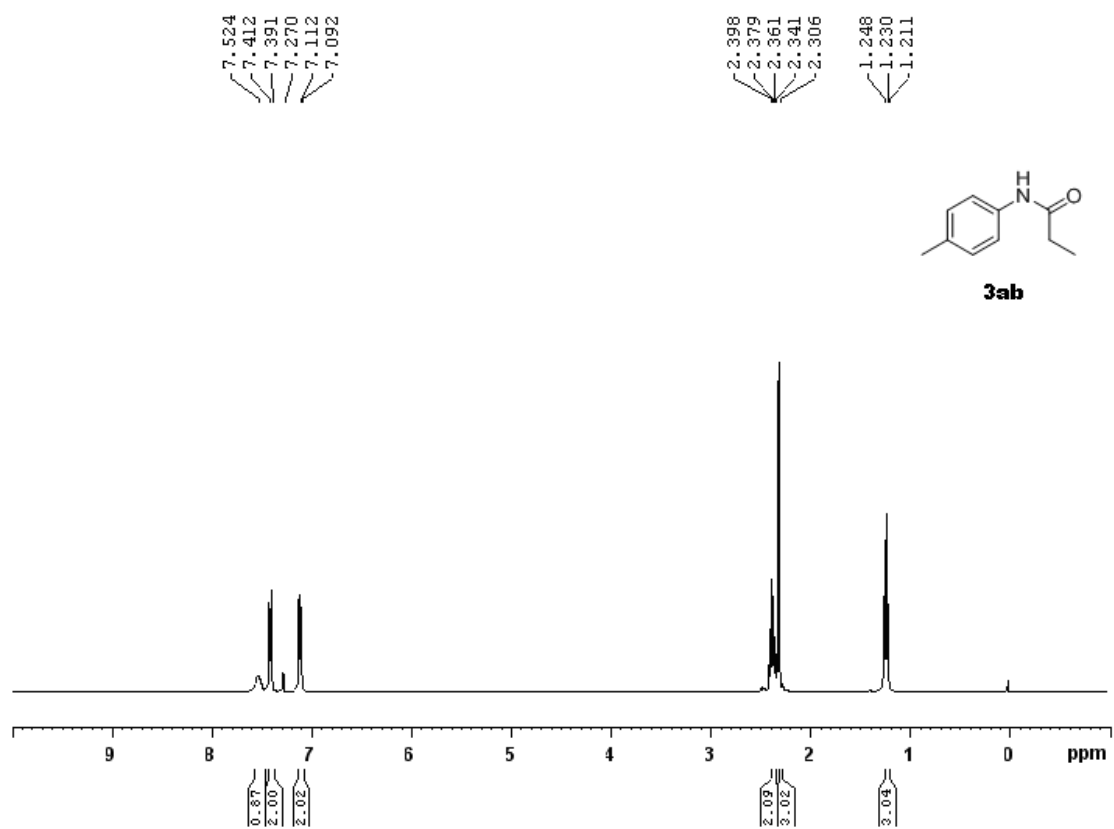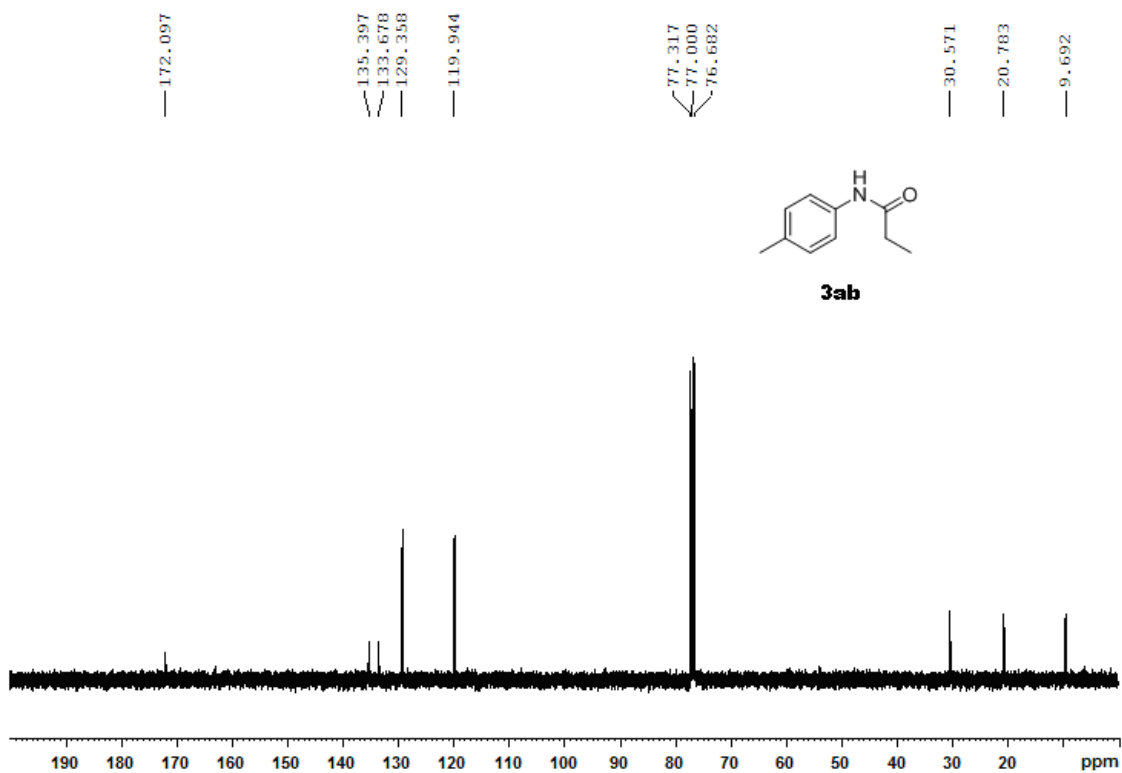

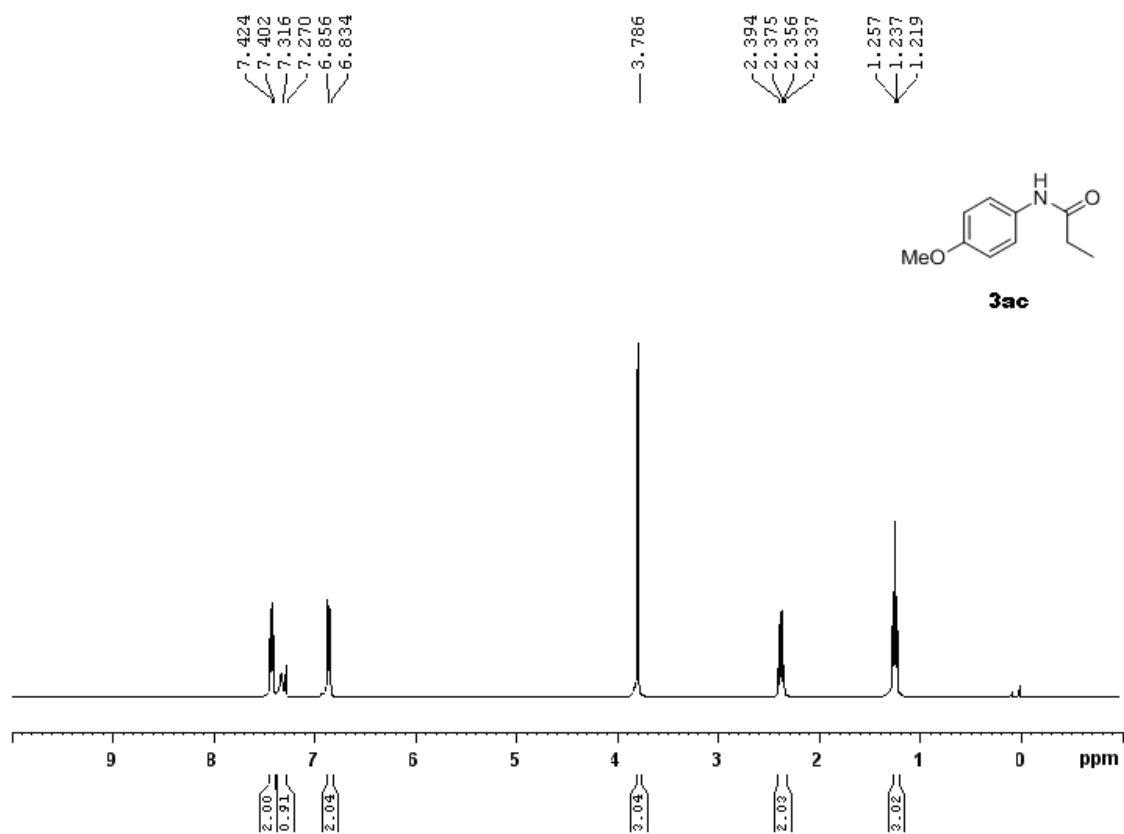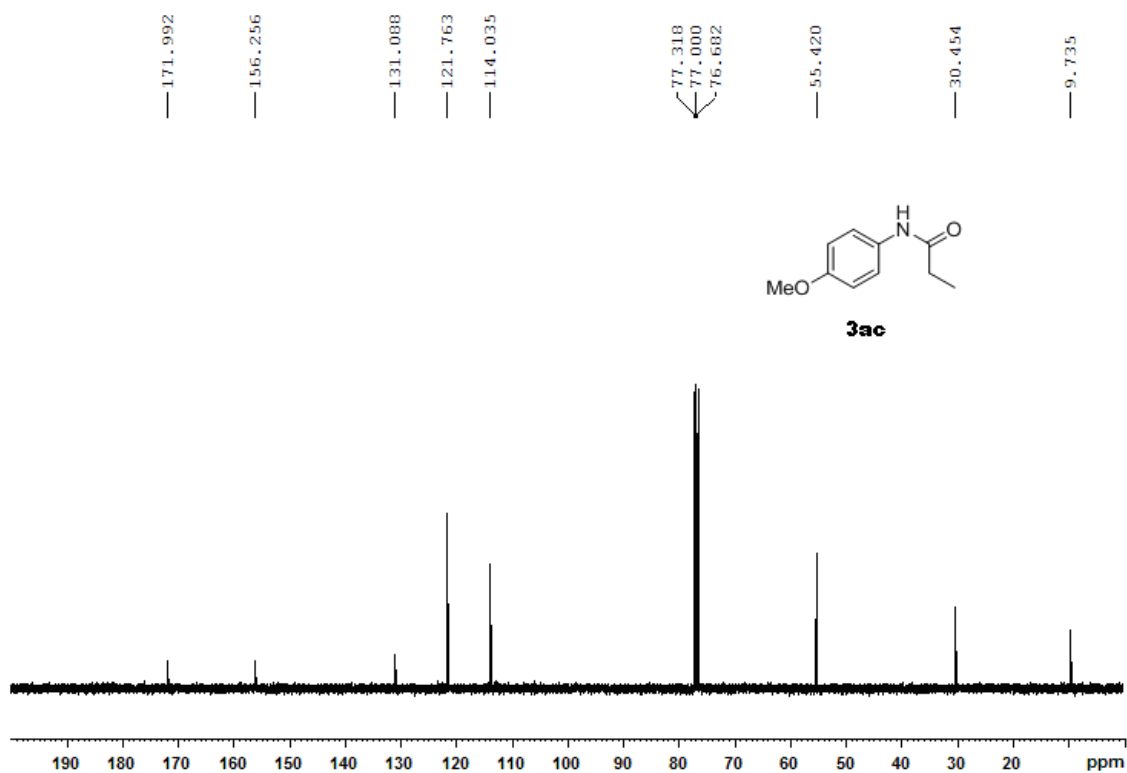

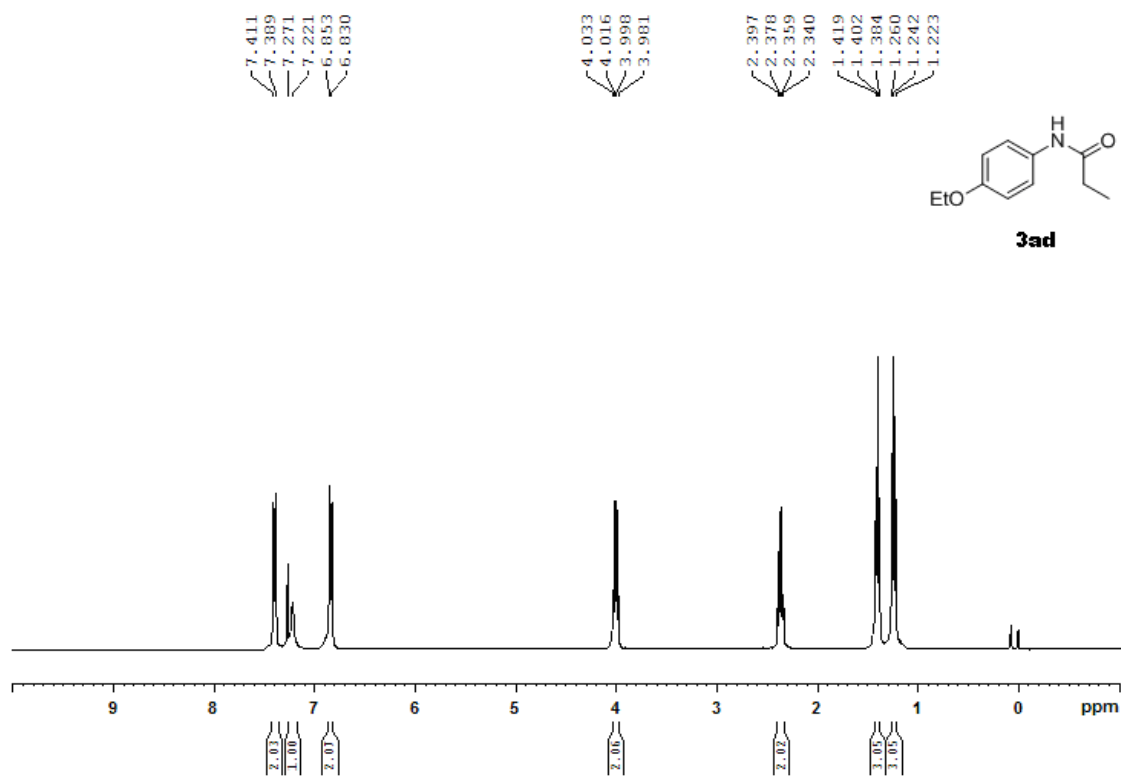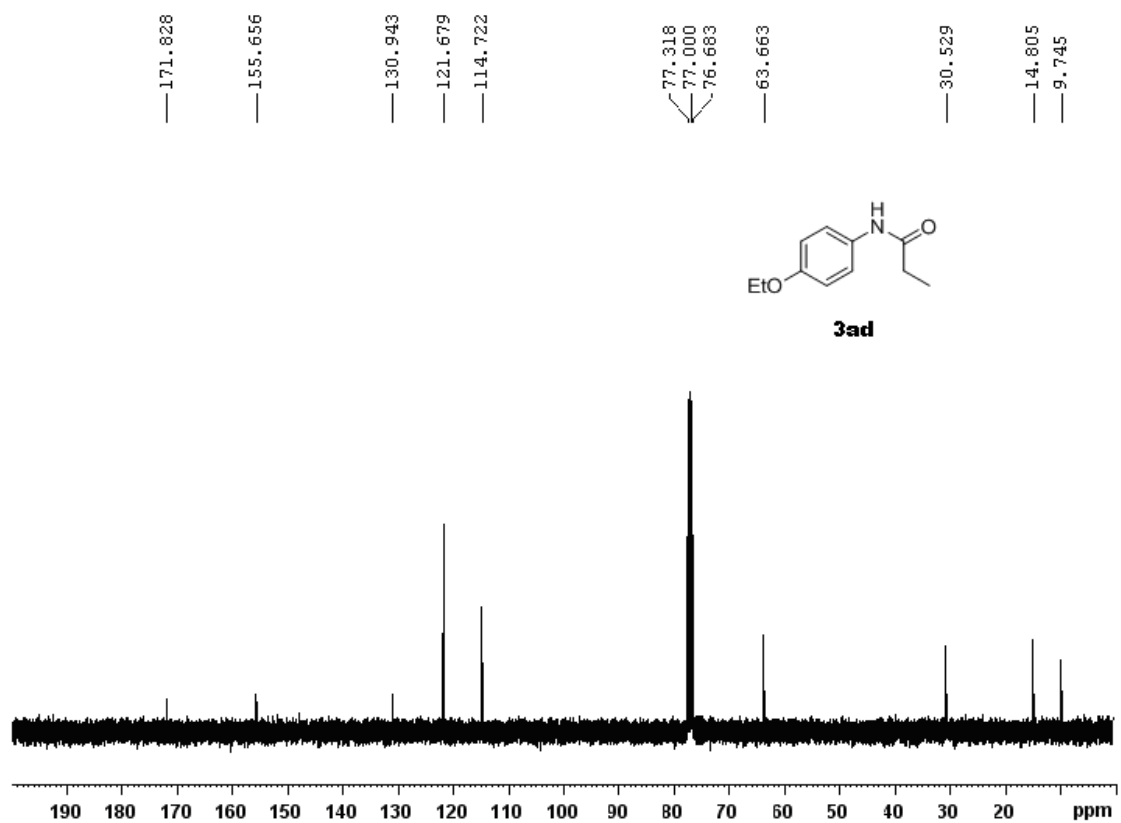

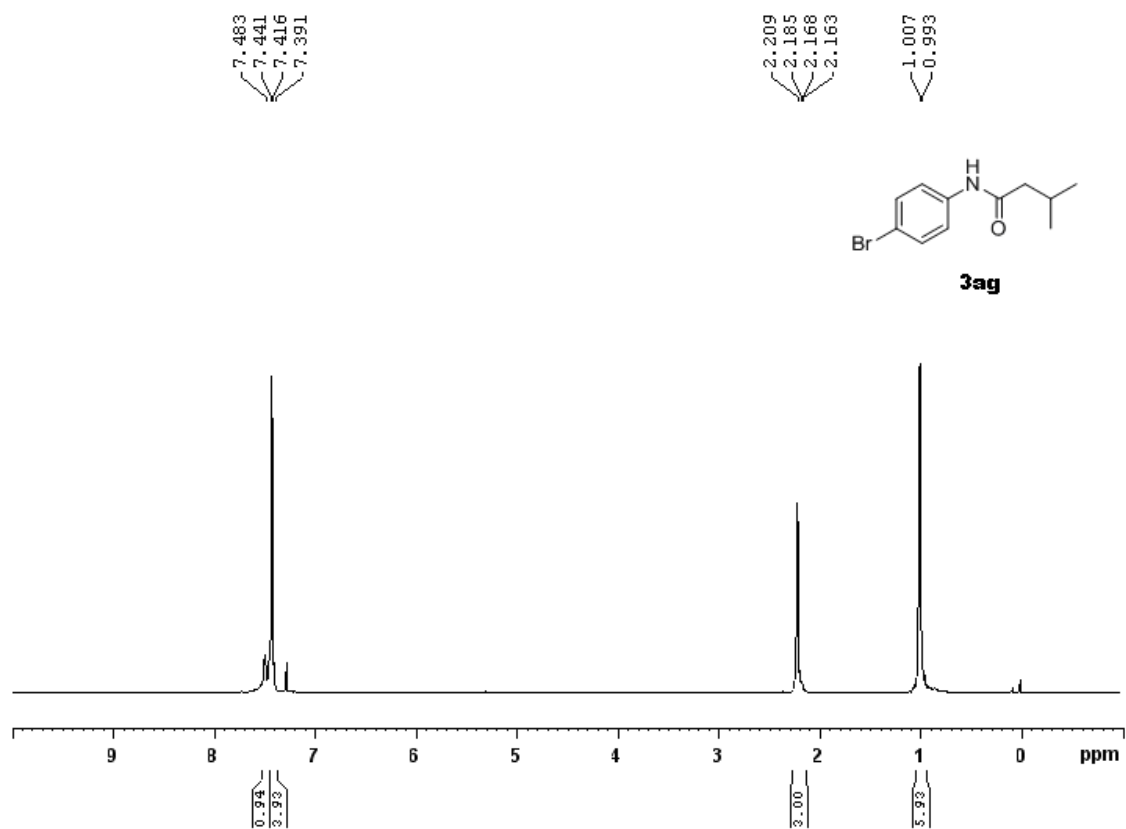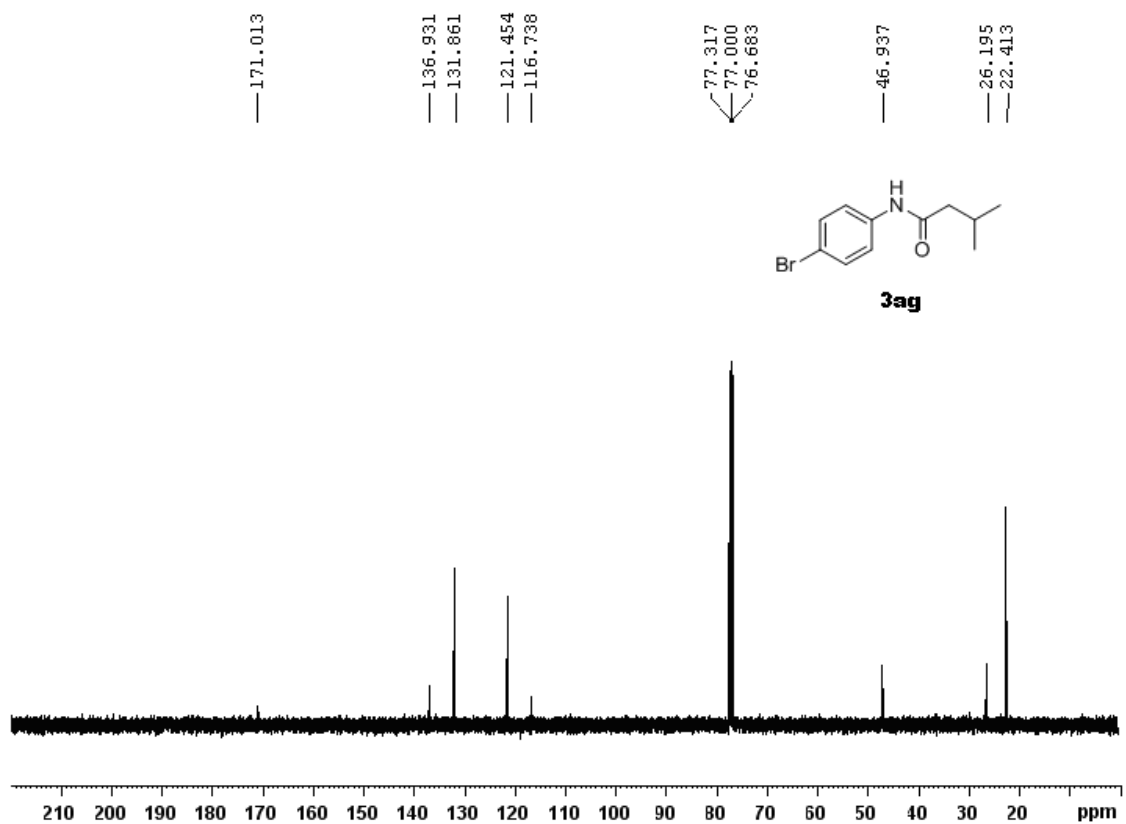

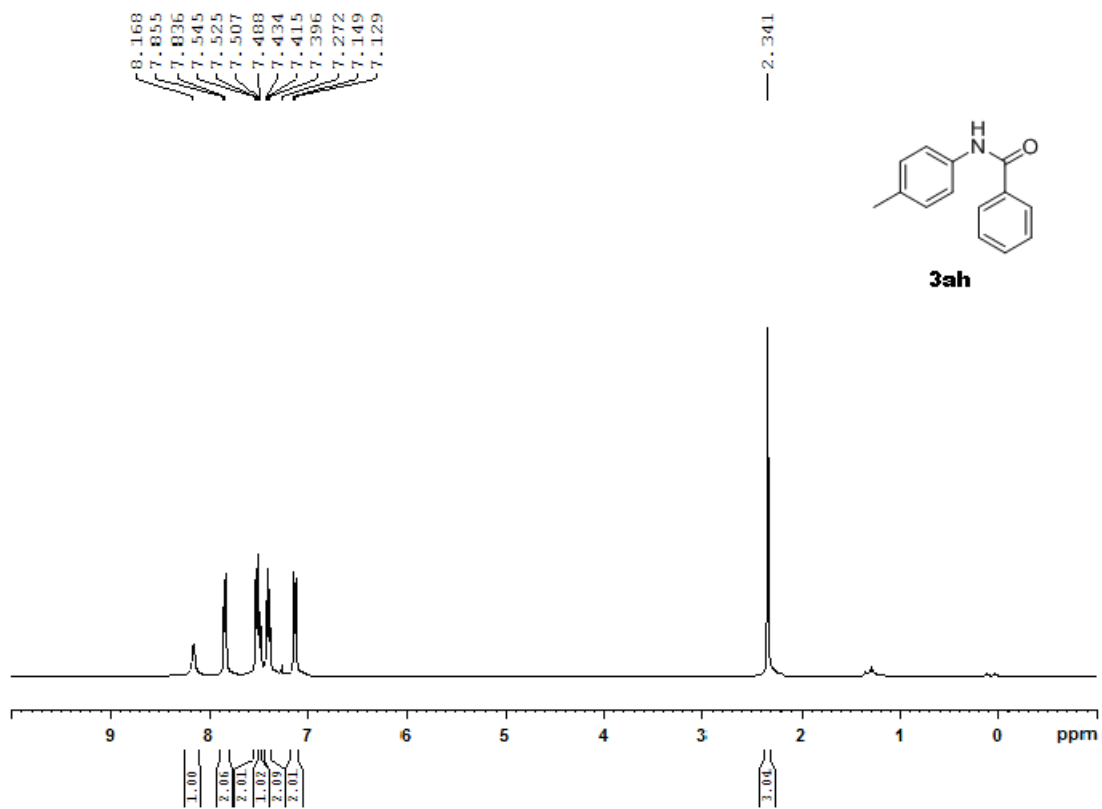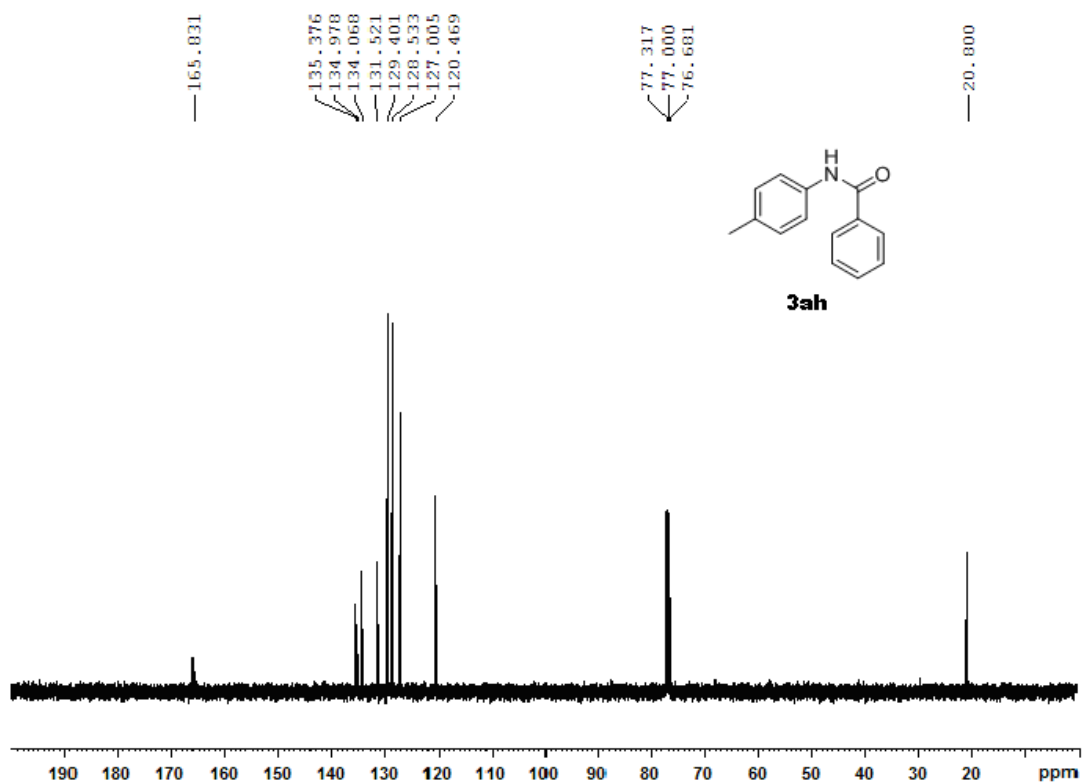

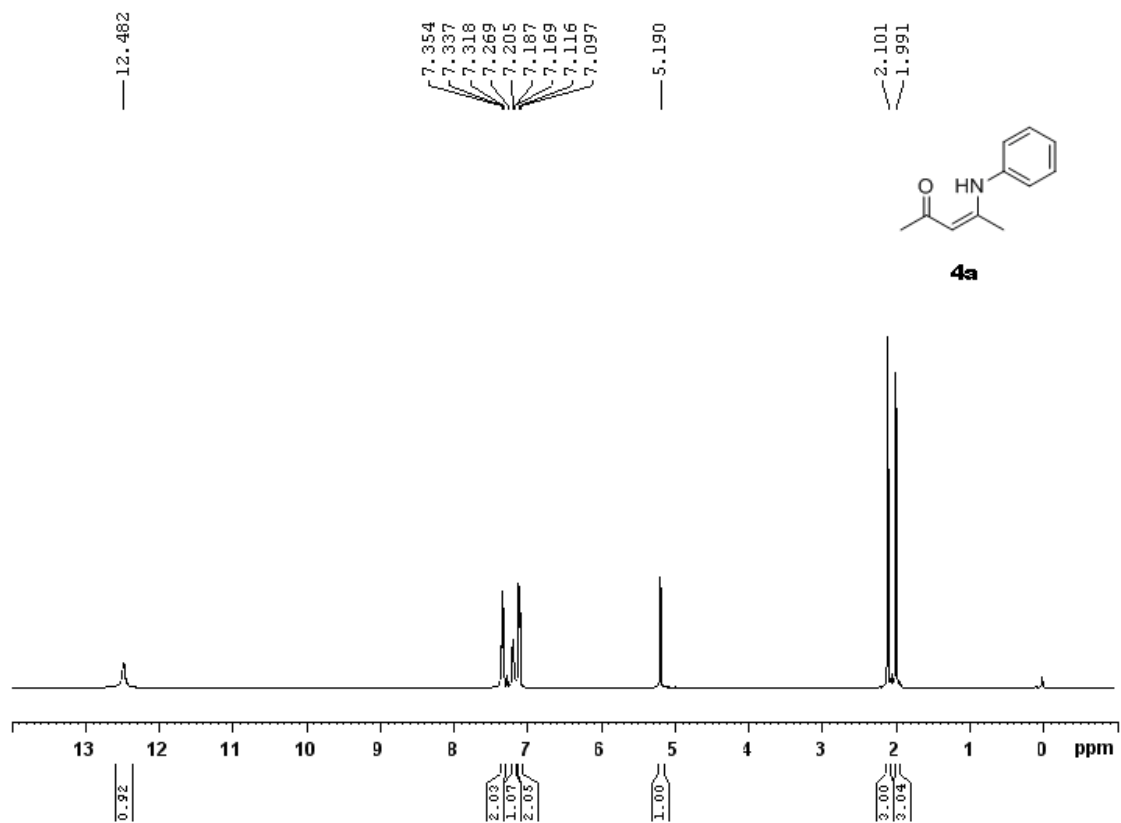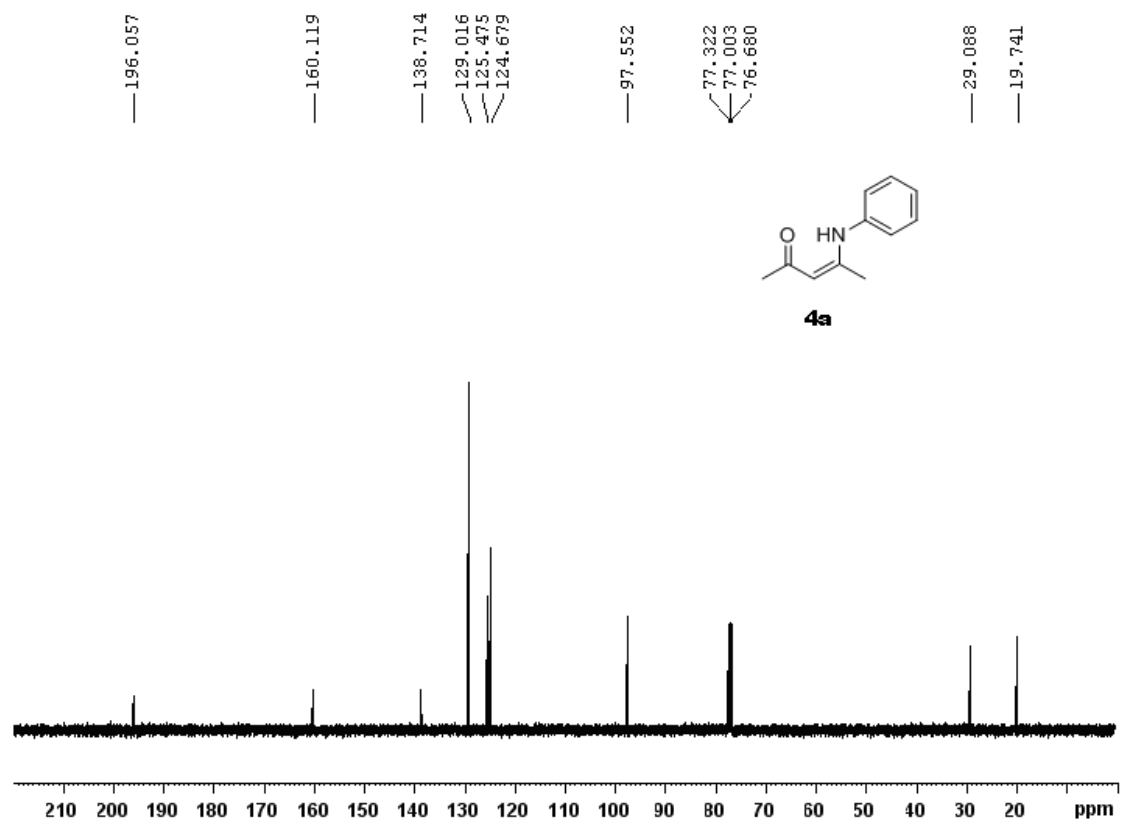

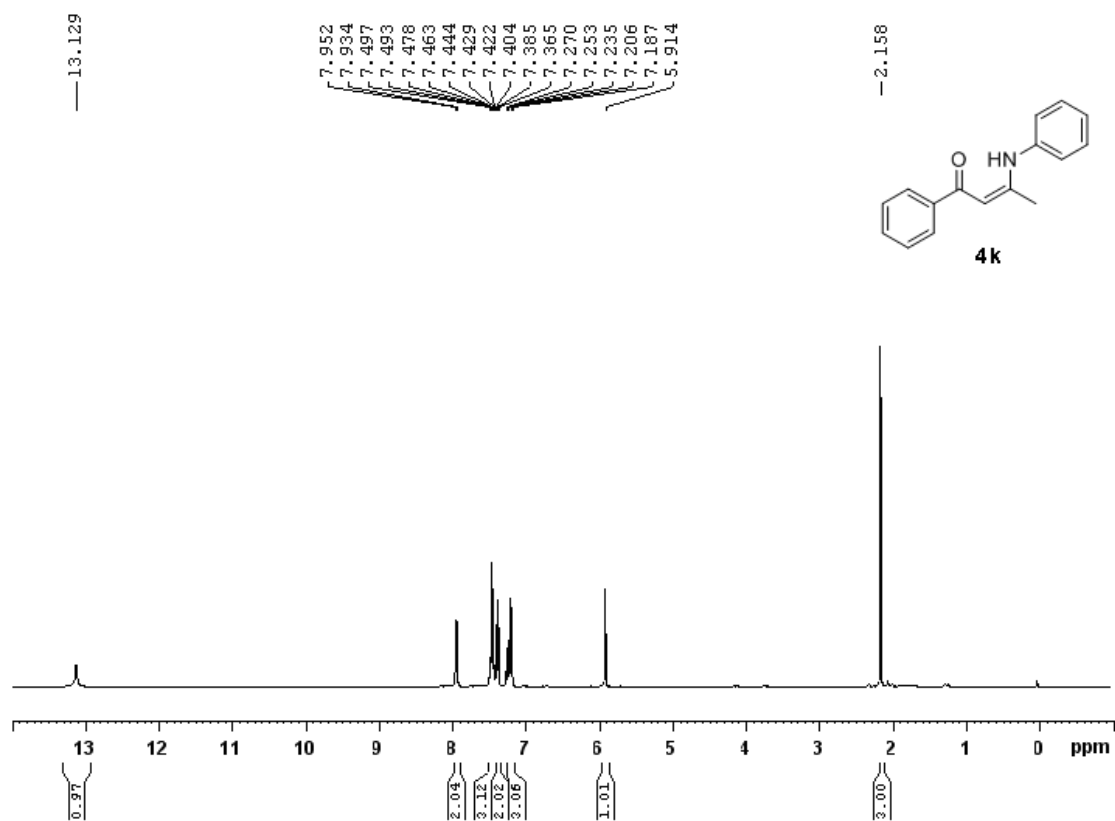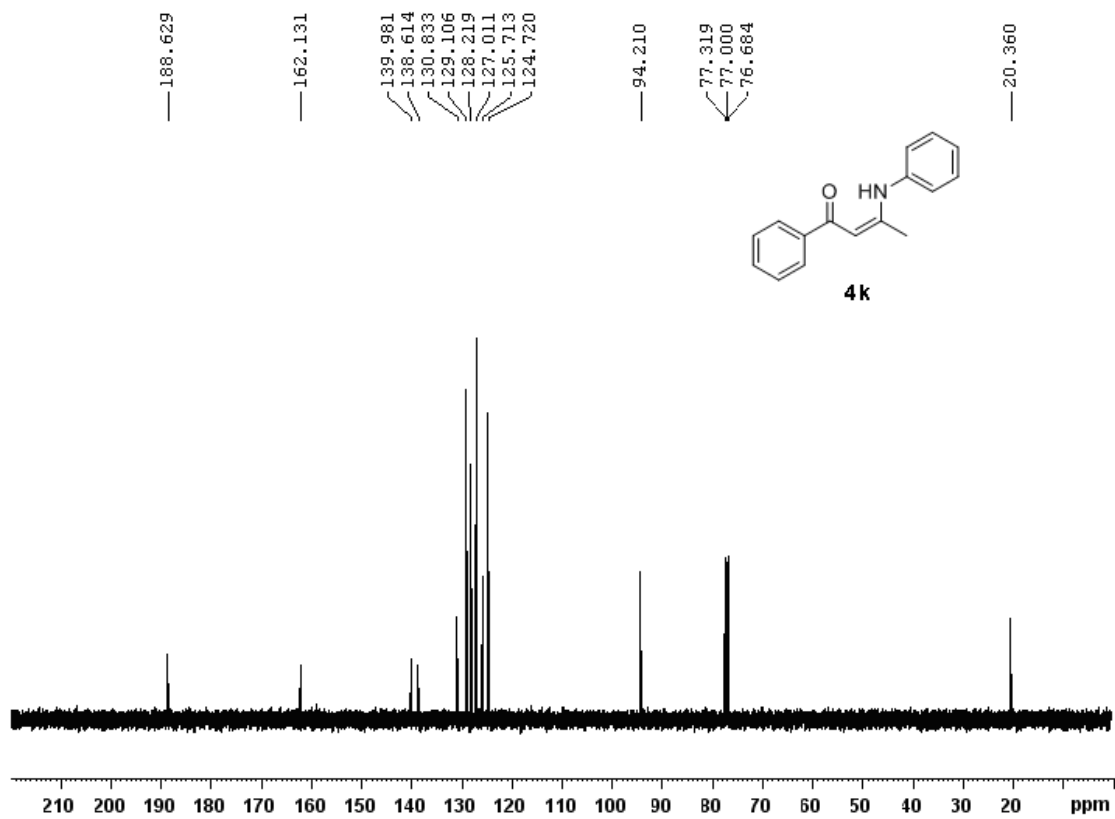



## 6. References

- [1] Furuya, Y.; Ishihara, K.; Yamamoto, H. *J. Am. Chem. Soc.* **2005**, *127*, 11240.
- [2] Li, M.; Hu, L.; Cao, X.; Hong, H.; Lu, J.; Gu, H. *Chem. Eur. J.* **2011**, *17*, 2763.
- [3] Bhattacharya, A.; Purohit, V. C.; Suarez, V.; Tichkule, R.; Parmera, G.; Rinaldi, F. *Tetrahedron Lett.* **2006**, *47*, 1861.
- [4] Bose, A. K.; Manhas, M. S.; Pednekar, S.; Ganguly, S. N.; Dang, H.; He, W.; Mandadi, A. *Tetrahedron Lett.* **2005**, *46*, 1901.
- [5] Saxena, A. K.; Arunamurthy, V.; Patnaik, G. K.; Jain, P. C.; Anand, N. *Indian J. Chem. B* **1980**, *19*, 10.
- [6] Zhang, Y.; Feng, J.; Li, C.-J. *J. Am. Chem. Soc.* **2008**, *130*, 2900.
- [7] Suzuki, H.; Tatsumi, A.; Ishibashi, T.; Mori, T. *J. Chem. Soc. Perkin. Trans. 1* **1995**, 339.
- [8] Kim, B. H.; Han, R.; Piao, F.; Jun, Y. M.; Baik, W.; Lee, B. M. *Tetrahedron Lett.* **2003**, *44*, 77.
- [9] Johnsson, R.; Meijer, A.; Ellervik, U. *Tetrahedron* **2005**, *61*, 11657.
- [10] Luque, R.; Budarin, V.; Clark, J. H.; Macquarrie, D. J. *Green Chem.* **2009**, *11*, 459.
- [11] Khaligh, N. G. *RSC Advances* **2013**, *3*, 99.
- [12] O'Neill, P. M.; Harrison, A. C.; Storr, R. C.; Hawley, S. R.; Ward, S. A.; Park, B. K. *J. Med. Chem.* **1994**, *37*, 1362.
- [13] Drillaud, N.; Banaszak-Léonard, E.; Pezron, I.; Len, C. *J. Org. Chem.* **2012**, *77*, 9553.
- [14] Ramalingan, C.; Park, Y.-T. *J. Org. Chem.* **2007**, *72*, 4536.
- [15] Hill, A. J.; Rabinowitz, I. *J. Am. Chem. Soc.* **1926**, *48*, 734.
- [16] Kuehn, M.; McElvain, S. M. *J. Am. Chem. Soc.* **1931**, *53*, 1173.
- [17] Zhang, M.; Imm, S.; Bähn, S.; Neubert, L.; Neumann, H.; Beller, M. *Angew. Chem. Int. Ed.* **2012**, *51*, 3905.
- [18] Epifano, F.; Genovese, S.; Curini, M. *Tetrahedron Lett.* **2007**, *48*, 2717.
- [19] Katritzky, A. R.; Hayden, A. E.; Kirichenko, K.; Pelphrey, P.; Ji, Y. *J. Org. Chem.* **2004**, *69*, 5108.
